# Supplementary material for: A behavioural dataset for studying individual differences in language skills
Source: PubMed Central journal article supplement (PMC7722889; doi:10.1038/s41597-020-00758-x), 2020-12-08
Supplement: 41597_2020_758_MOESM1_ESM.pdf [file 41597_2020_758_MOESM1_ESM.pdf]

| Test                                                 | Page | Test                                                        | Page |
|------------------------------------------------------|------|-------------------------------------------------------------|------|
| 0.1 Intake questionnaire                             | 1    | <b>Linguistic processing skills tests</b>                   |      |
| <b>Linguistic experience tests</b>                   |      | <i>Word production</i>                                      |      |
| 1. Stairs4Words                                      | 4    | 18. Picture naming test                                     | 89   |
| 2. Peabody picture vocabulary test                   | 71   | 19. Rapid automatized naming (RAN)                          | 90   |
| 3. Spelling test                                     | 72   | 20. Antonym production                                      | 91   |
| 4. Author recognition test                           | 74   | 21. Verbal fluency                                          | 92   |
| 5. Idiom recognition test                            | 78   | 22. Maximal speech rate                                     | 92   |
| 6. Prescriptive grammar test                         | 80   | 23. One-minute-test                                         | 93   |
| 7. Syntest                                           | 83   | 24. Klepel test                                             | 95   |
| <b>General cognitive skills tests</b>                |      | <i>Word comprehension</i>                                   |      |
| 8. Auditory simple reaction time test                | 83   | 25. Monitoring in noise in lists                            | 96   |
| 9. Auditory choice reaction time test                | 83   | 26. Rhyme judgment                                          | 102  |
| 10. Letter comparison test                           | 83   | 27. Auditory lexical decision                               | 103  |
| 11. Visual simple reaction time test                 | 85   | 28. Semantic categorization                                 | 105  |
| 12. Visual choice reaction time test                 | 85   | <i>Sentence production</i>                                  |      |
| 13. Digit span test (forward and backward)           | 85   | 29. Phrase and sentence generation                          | 107  |
| 14. Corsi block clicking test (forward and backward) | 86   | 30. Spontaneous speech                                      | 110  |
| 15. Eriksen Flanker test                             | 87   | <i>Sentence comprehension</i>                               |      |
| 16. Antisaccade test                                 | 87   | 31. Gender cue activation during sentence comprehension     | 111  |
| 17. Raven's advanced progressive matrices test       | 88   | 32. Verb semantics activation during sentence comprehension | 113  |
|                                                      |      | 33. Monitoring in noise in sentences                        | 114  |

## 0.1 Intake questionnaire

1. First name: \_\_\_\_\_
2. Last name: \_\_\_\_\_
3. Address  
Street: \_\_\_\_\_ House number: \_\_\_\_\_  
Postal code: \_\_\_\_\_ City/town/village: \_\_\_\_\_
4. Bank account: \_\_\_\_\_
5. ID number : \_\_\_\_\_
6. Email: \_\_\_\_\_
7. Date of birth (dd/mm/yyyy): \_\_\_\_\_
8. Gender: (M/F/other)
9. Country of birth: (choice menu)  
Choice 'Other' → Other, namely: \_\_\_\_\_  
Choice = Netherlands:  
Province of birth: (choice menu)  
Where did you grow up? \_\_\_\_\_
10. What is your native language (language acquired from birth)? (choice menu)  
Choice 'Other' → Other, namely: \_\_\_\_\_  
Choice = Dutch:  
Do you speak a dialect? (yes/no)  
If yes, which one: \_\_\_\_\_  
Choice ≠ Netherlands:  
At which age did you start learning Dutch? \_\_\_\_\_
11. Did you learn two or more languages from birth? (yes/no)  
Yes, namely: (choice menu)
12. Did you learn more languages at a later stage in life (for instance at school or while studying abroad)? (yes/no)  
Yes, namely: 1. choice menu since year: \_\_\_\_\_  
How often do you speak this language?  
choice menu (daily, weekly, monthly, incidental)  
2. choice menu since year: \_\_\_\_\_  
How often do you speak this language?  
choice menu (daily, weekly, monthly, incidental)  
(up until 5 languages)

Other: \_\_\_\_\_ since year: \_\_\_\_\_

How often do you speak this language?

choice menu (daily, weekly, monthly, incidental)

13. Are there other languages you use regularly? (yes/no)

Yes, namely: \_\_\_\_\_

14. What is your highest (completed) education? (choice menu)

What is the highest (completed) education of your mother? (choice menu)

What is the highest (completed) education of your father? (choice menu)

15. Are you currently a student? (yes/no)

Yes: Do you study part-time? (yes/no)

*(if answered no, participants will only see the questions about educational level and educational support; if answered yes, participants will also see the questions about their job)*

Yes: What is your current educational level? (choice menu)

Please select a sector for your educational program by choosing one of the options.  
(choice menu)

Other: \_\_\_\_\_

Do you receive educational support (for instance because of dyslexia, concentration problems, problems with hearing)? (yes/no)

If yes, please explain: \_\_\_\_\_

No:

Do you currently have a paid job? (yes/no)

Yes: Please select a sector for your job by choosing one of the options.  
(choice menu)

What is the scale of your income? (choice menu)

16. Do you currently play an instrument and/or do you sing (for instance in a choir), or did you do so in the past? (yes/no)

If yes, for how long? \_\_\_\_\_

17. How many hours per week do you watch Dutch television? \_\_\_\_\_

18. How many hours per week do you watch Dutch series and/or films? \_\_\_\_\_

19. How often do you listen to Dutch radio? \_\_\_\_\_

20. How many hours per week do you read in Dutch? \_\_\_\_\_

21. Do you carry out any of the above activities in (one of) your other languages? (yes/no)

Yes: How many hours per week do you watch television in (one of your other languages)?

\_\_\_\_\_

How many hours per week do you watch series and/or films in (one of) your other languages?

\_\_\_\_\_

How often do you listen to the radio in (one of) your other languages?

\_\_\_\_\_

How many hours per week do you read in (one of) your other languages?

\_\_\_\_\_

22. Do you have problems with your sight? (yes/no)

Yes: Is your sight corrected using glasses or contact lenses? (yes/no)

23. Are you color blind? (yes/no)

Yes: Which colors do you have difficulty seeing? \_\_\_\_\_

24. Do you have problems with your hearing? (yes/no)

Yes: Do you wear a hearing aid? (yes/no)

25. Are you right- or left-handed? (Right/Left/Both)

26. Do you have one or more left-handed first degree family members? (yes/no)

Yes: Is your father left-handed? (yes/no)

Is your mother left-handed? (yes/no)

Do you have a brother and/or sister that is left-handed? (yes/no)

27. Do you have an illness or handicap, which makes it difficult to use the keyboard? (yes/no)

28. Do you have dyslexia? (yes/no)

29. Do you have speech problems (e.g., stuttering)? (yes/no)

Yes, namely: \_\_\_\_\_

30. Do you have an illness impacting on your concentration and/or causing difficulties with learning (for instance ADHD, ADD or autism)? (yes/no)

Yes, namely: \_\_\_\_\_

## Linguistic experience

### 1. Stairs4Words

Run 1: Words

| Band | Word          | Prevalence | Log Google Frequency | Difference Belgium/Netherlands |
|------|---------------|------------|----------------------|--------------------------------|
| 1    | vaak          | 1.00       | 5.26                 | 0.0                            |
| 1    | stoeien       | 1.00       | 3.45                 | 0.0                            |
| 1    | snurken       | 1.00       | 3.41                 | 0.0                            |
| 1    | wens          | 1.00       | 4.43                 | 0.0                            |
| 1    | wurgen        | 1.00       | 3.50                 | 0.0                            |
| 1    | leegte        | 1.00       | 4.01                 | 0.0                            |
| 1    | klimmen       | 1.00       | 3.91                 | 0.0                            |
| 1    | begeleiden    | 1.00       | 3.98                 | 0.0                            |
| 1    | belang        | 1.00       | 5.09                 | 0.0                            |
| 1    | matig         | 1.00       | 3.87                 | 0.0                            |
| 1    | binnen        | 1.00       | 5.37                 | 0.0                            |
| 1    | verdwijnen    | 1.00       | 4.48                 | 0.0                            |
| 1    | plechtig      | 1.00       | 3.84                 | 0.0                            |
| 1    | verdrijven    | 1.00       | 3.74                 | 0.0                            |
| 1    | tiener        | 1.00       | 3.54                 | 0.0                            |
| 1    | bril          | 1.00       | 4.23                 | 0.0                            |
| 1    | traditie      | 1.00       | 4.65                 | 0.0                            |
| 1    | geheugen      | 1.00       | 4.29                 | 0.0                            |
| 1    | teleurgesteld | 1.00       | 4.04                 | 0.0                            |
| 1    | groep         | 1.00       | 5.05                 | 0.0                            |
| 2    | installeren   | 1.00       | 3.50                 | 0.0                            |
| 2    | belegging     | 1.00       | 3.25                 | 0.0                            |
| 2    | nationaal     | 1.00       | 4.73                 | 0.0                            |
| 2    | struik        | 1.00       | 3.77                 | 0.0                            |
| 2    | kunstzinnig   | 1.00       | 3.42                 | 0.0                            |
| 2    | opwindend     | 1.00       | 3.75                 | 0.0                            |
| 2    | stofzuiger    | 1.00       | 3.49                 | 0.0                            |
| 2    | poort         | 1.00       | 4.23                 | 0.0                            |
| 2    | stiefmoeder   | 1.00       | 3.52                 | 0.0                            |
| 2    | onderschatten | 1.00       | 3.60                 | 0.0                            |
| 2    | rommel        | 1.00       | 3.87                 | 0.0                            |
| 2    | authentiek    | 1.00       | 3.68                 | 0.0                            |
| 2    | mos           | 1.00       | 3.85                 | 0.0                            |
| 2    | appeltaart    | 1.00       | 3.52                 | 0.0                            |
| 2    | bijzonder     | 1.00       | 5.03                 | 0.0                            |
| 2    | sprookje      | 1.00       | 3.81                 | 0.0                            |
| 2    | hangmat       | 1.00       | 3.40                 | 0.0                            |
| 2    | bemoeien      | 1.00       | 3.86                 | 0.0                            |
| 2    | aanvallend    | 1.00       | 3.48                 | 0.0                            |
| 2    | deurknop      | 1.00       | 3.25                 | 0.0                            |
| 3    | rolschaats    | 1.00       | 2.57                 | -0.5                           |
| 3    | ongeval       | 1.00       | 3.67                 | 0.3                            |
| 3    | kaak          | 1.00       | 3.85                 | -0.4                           |

|   |                |      |      |      |
|---|----------------|------|------|------|
| 3 | snoeien        | 1.00 | 3.35 | -0.4 |
| 3 | verbinden      | 1.00 | 4.13 | -0.5 |
| 3 | afknapper      | 1.00 | 3.24 | -0.1 |
| 3 | voorspoedig    | 1.00 | 3.58 | 0.0  |
| 3 | bevruchting    | 1.00 | 3.34 | -0.7 |
| 3 | blok           | 1.00 | 4.29 | -0.4 |
| 3 | knop           | 1.00 | 3.93 | -0.1 |
| 3 | omtrek         | 1.00 | 3.74 | -0.4 |
| 3 | scheerschuim   | 1.00 | 2.98 | -0.4 |
| 3 | gokspel        | 1.00 | 2.95 | -0.4 |
| 3 | geestelijk     | 1.00 | 4.16 | 0.0  |
| 3 | worden         | 1.00 | 5.55 | 0.0  |
| 3 | nutteloos      | 1.00 | 3.68 | -0.4 |
| 3 | bepaald        | 1.00 | 4.96 | -0.4 |
| 3 | beeldspraak    | 1.00 | 3.69 | -0.4 |
| 3 | zandbak        | 1.00 | 3.42 | -0.4 |
| 3 | gelegenheid    | 1.00 | 4.82 | -0.4 |
| 4 | vraagstuk      | 1.00 | 4.05 | -0.1 |
| 4 | kunstenaar     | 1.00 | 4.50 | 0.3  |
| 4 | slotvraag      | 1.00 | 2.66 | -0.1 |
| 4 | schrikkeljaar  | 1.00 | 3.19 | -0.4 |
| 4 | zien           | 1.00 | 5.41 | -0.4 |
| 4 | spar           | 1.00 | 3.32 | 0.0  |
| 4 | fotografisch   | 1.00 | 3.40 | 0.0  |
| 4 | volwaardig     | 1.00 | 3.66 | 0.3  |
| 4 | fruit          | 1.00 | 4.20 | 0.0  |
| 4 | verfpot        | 1.00 | 2.53 | 0.0  |
| 4 | aanvoeren      | 1.00 | 3.50 | 0.3  |
| 4 | balkon         | 1.00 | 3.90 | 0.3  |
| 4 | blazen         | 1.00 | 3.94 | -0.5 |
| 4 | alleen         | 1.00 | 5.48 | -0.5 |
| 4 | geel           | 1.00 | 4.33 | 0.3  |
| 4 | eergisteren    | 1.00 | 3.53 | -0.4 |
| 4 | gezicht        | 1.00 | 5.15 | 0.4  |
| 4 | verblijfplaats | 1.00 | 3.75 | -0.4 |
| 4 | wachtlijst     | 1.00 | 3.35 | -0.1 |
| 4 | verkeer        | 1.00 | 4.46 | -0.1 |
| 5 | toen           | 1.00 | 5.14 | -0.4 |
| 5 | liggend        | 1.00 | 3.85 | -0.5 |
| 5 | roomijs        | 1.00 | 3.27 | 0.0  |
| 5 | huurwoning     | 1.00 | 3.13 | -0.4 |
| 5 | arresteren     | 1.00 | 3.58 | -0.1 |
| 5 | paskamer       | 1.00 | 2.67 | -0.4 |
| 5 | viol           | 1.00 | 3.76 | -0.5 |
| 5 | zwemster       | 1.00 | 3.07 | -0.4 |
| 5 | zelfportret    | 1.00 | 3.84 | -0.1 |
| 5 | idiot          | 1.00 | 3.90 | -0.1 |
| 5 | afkijken       | 1.00 | 3.14 | -0.1 |
| 5 | slapen         | 1.00 | 4.63 | -0.5 |
| 5 | onrecht        | 1.00 | 3.92 | -0.1 |
| 5 | relatief       | 1.00 | 4.63 | -0.4 |
| 5 | fietstocht     | 1.00 | 3.44 | -0.5 |
| 5 | ijzerdraad     | 1.00 | 3.36 | 0.0  |

|   |                |      |      |      |
|---|----------------|------|------|------|
| 5 | onvolledig     | 1.00 | 3.67 | -0.1 |
| 5 | sterven        | 1.00 | 4.47 | -0.4 |
| 5 | virus          | 1.00 | 3.85 | -0.1 |
| 5 | lef            | 1.00 | 3.71 | -0.1 |
| 6 | bedekt         | 1.00 | 4.15 | -0.4 |
| 6 | giftig         | 1.00 | 3.44 | -0.4 |
| 6 | chronologisch  | 1.00 | 3.84 | -0.5 |
| 6 | tonijn         | 1.00 | 3.23 | -0.1 |
| 6 | toenadering    | 1.00 | 3.76 | -0.4 |
| 6 | ruimdenkend    | 1.00 | 3.26 | 0.3  |
| 6 | ontketenen     | 1.00 | 3.32 | -0.5 |
| 6 | geluk          | 1.00 | 4.67 | 0.3  |
| 6 | ondertiteling  | 1.00 | 3.10 | -0.6 |
| 6 | oogschaduw     | 1.00 | 3.10 | -0.5 |
| 6 | compositie     | 1.00 | 4.15 | -0.5 |
| 6 | bloempot       | 1.00 | 3.29 | 0.3  |
| 6 | waarschijnlijk | 1.00 | 5.09 | 0.0  |
| 6 | medewerkster   | 1.00 | 3.50 | 0.4  |
| 6 | verwarmen      | 1.00 | 3.39 | 0.0  |
| 6 | eerder         | 1.00 | 5.19 | 0.3  |
| 6 | achtervolger   | 1.00 | 3.20 | -0.5 |
| 6 | oplichting     | 1.00 | 3.26 | -0.4 |
| 6 | hoofdrol       | 1.00 | 3.90 | 0.3  |
| 6 | beker          | 1.00 | 3.90 | 0.0  |
| 7 | missen         | 1.00 | 4.29 | -0.5 |
| 7 | gast           | 1.00 | 4.12 | 0.2  |
| 7 | storen         | 1.00 | 3.72 | 0.7  |
| 7 | bijspringen    | 1.00 | 2.99 | 0.0  |
| 7 | trommelen      | 1.00 | 3.52 | 0.6  |
| 7 | siroop         | 1.00 | 3.14 | 0.6  |
| 7 | knagen         | 1.00 | 3.48 | 0.4  |
| 7 | genieten       | 1.00 | 4.40 | -0.4 |
| 7 | tas            | 1.00 | 4.31 | 0.0  |
| 7 | overhandigen   | 1.00 | 3.55 | 0.0  |
| 7 | portret        | 1.00 | 4.44 | 0.3  |
| 7 | behoedzaam     | 1.00 | 3.81 | 0.7  |
| 7 | krab           | 1.00 | 3.47 | -0.1 |
| 7 | handbagage     | 1.00 | 3.16 | -0.6 |
| 7 | conditie       | 1.00 | 3.89 | -0.5 |
| 7 | beperkt        | 1.00 | 4.73 | -0.1 |
| 7 | opluchting     | 1.00 | 4.02 | -0.1 |
| 7 | samen          | 1.00 | 5.23 | 0.7  |
| 7 | schurk         | 1.00 | 3.58 | -0.2 |
| 7 | grondgebied    | 1.00 | 4.08 | -0.5 |
| 8 | verwoesting    | 1.00 | 3.68 | 0.3  |
| 8 | schaal         | 1.00 | 4.50 | -0.6 |
| 8 | ontnemen       | 1.00 | 3.56 | 0.2  |
| 8 | overbrengen    | 1.00 | 3.73 | 0.3  |
| 8 | socialist      | 1.00 | 3.80 | 0.2  |
| 8 | worm           | 1.00 | 3.56 | 0.6  |
| 8 | ovaal          | 1.00 | 3.47 | 0.3  |
| 8 | studeren       | 1.00 | 4.11 | -0.3 |
| 8 | trillen        | 1.00 | 3.86 | -0.1 |

|    |                   |      |      |      |
|----|-------------------|------|------|------|
| 8  | bovenbeen         | 1.00 | 3.17 | -0.4 |
| 8  | gasleiding        | 1.00 | 2.63 | 0.2  |
| 8  | hartslag          | 1.00 | 3.78 | -0.2 |
| 8  | eigen             | 1.00 | 5.34 | 0.3  |
| 8  | bijleggen         | 1.00 | 3.04 | 0.6  |
| 8  | recreatief        | 1.00 | 3.26 | 0.0  |
| 8  | luxe              | 1.00 | 4.16 | 0.7  |
| 8  | wandelstok        | 1.00 | 3.64 | 0.3  |
| 8  | bij               | 1.00 | 5.19 | 0.2  |
| 8  | dolfijn           | 1.00 | 3.57 | 0.7  |
| 8  | construeren       | 1.00 | 3.54 | -0.1 |
| 9  | verklaren         | 1.00 | 4.50 | -0.1 |
| 9  | versie            | 1.00 | 4.56 | 0.7  |
| 9  | breken            | 1.00 | 4.26 | -0.7 |
| 9  | veldtocht         | 1.00 | 3.66 | 0.6  |
| 9  | tocht             | 1.00 | 4.29 | 0.6  |
| 9  | deelwoord         | 1.00 | 3.32 | 0.0  |
| 9  | zonsverduistering | 1.00 | 3.26 | 0.2  |
| 9  | adresboek         | 1.00 | 3.16 | -0.2 |
| 9  | toewensen         | 1.00 | 3.22 | -0.6 |
| 9  | toestel           | 1.00 | 3.90 | 0.2  |
| 9  | microscop         | 1.00 | 3.40 | 0.6  |
| 9  | verkering         | 1.00 | 3.48 | -0.1 |
| 9  | gevoeligheid      | 1.00 | 3.73 | -0.2 |
| 9  | vissersboot       | 1.00 | 3.27 | -0.1 |
| 9  | tafelblad         | 1.00 | 3.56 | 0.2  |
| 9  | verleden          | 1.00 | 4.94 | 0.2  |
| 9  | bloedgroep        | 1.00 | 3.16 | 0.3  |
| 9  | betreffen         | 1.00 | 3.98 | -0.7 |
| 9  | slechts           | 1.00 | 5.18 | 0.2  |
| 9  | prima             | 1.00 | 4.46 | 0.2  |
| 10 | zelfcontrole      | 1.00 | 3.12 | -0.1 |
| 10 | diepte            | 1.00 | 4.18 | 0.3  |
| 10 | uitpluizen        | 1.00 | 3.18 | 0.1  |
| 10 | bereiken          | 1.00 | 4.68 | 0.7  |
| 10 | hemels            | 1.00 | 3.89 | 0.2  |
| 10 | meetkundig        | 1.00 | 2.93 | 0.7  |
| 10 | ontvanger         | 1.00 | 3.81 | 0.2  |
| 10 | verslag           | 1.00 | 4.67 | -0.2 |
| 10 | luisteren         | 1.00 | 4.45 | 0.6  |
| 10 | afsterven         | 1.00 | 3.43 | 0.7  |
| 10 | opdragen          | 1.00 | 3.42 | 0.6  |
| 10 | maand             | 1.00 | 4.76 | 0.7  |
| 10 | wachttoren        | 1.00 | 3.40 | -0.1 |
| 10 | fietsbel          | 1.00 | 2.98 | 0.2  |
| 10 | sterveling        | 1.00 | 3.51 | -0.1 |
| 10 | treuzelen         | 1.00 | 3.16 | -0.5 |
| 10 | blijkbaar         | 1.00 | 4.67 | 0.3  |
| 10 | poetsen           | 1.00 | 3.71 | -0.1 |
| 10 | geheim            | 1.00 | 4.56 | 0.3  |
| 10 | treinreis         | 1.00 | 3.46 | -0.5 |
| 11 | geladen           | 1.00 | 3.96 | 0.3  |
| 11 | schelp            | 1.00 | 3.64 | 0.2  |



|    |                 |      |      |      |
|----|-----------------|------|------|------|
| 11 | mislukken       | 1.00 | 3.78 | -0.1 |
| 11 | kunstmest       | 1.00 | 3.40 | -0.7 |
| 11 | voorschieten    | 1.00 | 2.68 | 0.3  |
| 11 | buitenschools   | 1.00 | 2.67 | -0.1 |
| 11 | ondervragen     | 1.00 | 3.48 | 0.0  |
| 11 | gereserveerd    | 1.00 | 3.87 | 0.3  |
| 11 | psycholoog      | 1.00 | 3.70 | -0.5 |
| 11 | alvast          | 1.00 | 4.08 | 0.3  |
| 11 | schildpad       | 1.00 | 3.49 | -0.6 |
| 11 | herenhuis       | 1.00 | 3.53 | -0.2 |
| 11 | lastpost        | 1.00 | 3.34 | -0.6 |
| 11 | roeiboort       | 1.00 | 3.54 | 0.4  |
| 11 | levensles       | 1.00 | 3.31 | -0.2 |
| 11 | decoratie       | 1.00 | 3.74 | 0.7  |
| 11 | uitglijden      | 1.00 | 2.95 | 0.5  |
| 11 | menselijkheid   | 1.00 | 3.64 | 0.2  |
| 11 | atoom           | 1.00 | 3.42 | -0.4 |
| 11 | moeite          | 1.00 | 4.84 | 0.6  |
| 12 | blik            | 1.00 | 4.95 | 0.3  |
| 12 | stoofvlees      | 1.00 | 3.10 | 0.5  |
| 12 | splitsing       | 1.00 | 3.72 | 0.2  |
| 12 | sommige         | 1.00 | 4.99 | 0.2  |
| 12 | onvervangbaar   | 1.00 | 3.30 | 0.1  |
| 12 | compleet        | 1.00 | 4.37 | -0.4 |
| 12 | versieren       | 1.00 | 3.64 | 0.7  |
| 12 | dreigbrief      | 1.00 | 3.26 | -0.1 |
| 12 | overmatig       | 1.00 | 3.42 | 0.7  |
| 12 | noordpool       | 1.00 | 3.52 | 0.1  |
| 12 | stroming        | 1.00 | 3.94 | 0.2  |
| 12 | begraafplaats   | 1.00 | 3.86 | -0.1 |
| 12 | veroveren       | 1.00 | 3.91 | -0.6 |
| 12 | overwaaien      | 1.00 | 3.16 | 0.5  |
| 12 | appelmoes       | 1.00 | 3.40 | 0.7  |
| 12 | gloednieuw      | 1.00 | 3.39 | 0.2  |
| 12 | agent           | 1.00 | 4.32 | 0.3  |
| 12 | dramatisch      | 1.00 | 3.89 | 0.1  |
| 12 | kunstvorm       | 1.00 | 3.42 | 0.2  |
| 12 | verzachten      | 1.00 | 3.53 | 0.3  |
| 13 | doorbrengen     | 1.00 | 3.85 | -0.3 |
| 13 | afmeten         | 1.00 | 3.15 | 0.6  |
| 13 | meevallen       | 1.00 | 3.32 | -0.2 |
| 13 | mogelijk        | 1.00 | 5.26 | 0.7  |
| 13 | sneeuw          | 1.00 | 4.37 | 0.1  |
| 13 | pier            | 1.00 | 3.81 | 0.3  |
| 13 | overhouden      | 1.00 | 3.38 | 0.5  |
| 13 | smal            | 1.00 | 3.96 | 0.6  |
| 13 | opzwellen       | 1.00 | 2.91 | 0.2  |
| 13 | inktvis         | 1.00 | 3.53 | 0.3  |
| 13 | weggeven        | 1.00 | 3.27 | -0.1 |
| 13 | paardrijden     | 1.00 | 3.52 | 0.9  |
| 13 | bevriezen       | 1.00 | 3.37 | 0.6  |
| 13 | bloedtransfusie | 1.00 | 3.16 | 0.7  |
| 13 | bioscoop        | 1.00 | 3.80 | -0.7 |

|    |              |      |      |      |
|----|--------------|------|------|------|
| 13 | aangeslagen  | 1.00 | 3.71 | 0.6  |
| 13 | mei          | 1.00 | 5.08 | 0.3  |
| 13 | daglicht     | 1.00 | 4.00 | 0.1  |
| 13 | weerstaan    | 1.00 | 3.75 | 0.6  |
| 13 | gewijzigd    | 1.00 | 4.16 | -0.4 |
| 14 | senior       | 1.00 | 3.91 | -0.7 |
| 14 | fietsband    | 1.00 | 2.95 | 0.6  |
| 14 | hoogst       | 1.00 | 4.20 | -0.4 |
| 14 | knoeien      | 1.00 | 3.35 | 0.2  |
| 14 | neerleggen   | 1.00 | 3.71 | 0.1  |
| 14 | malaria      | 1.00 | 3.53 | -0.3 |
| 14 | vereiste     | 1.00 | 4.08 | -0.1 |
| 14 | kapot        | 1.00 | 4.09 | -0.3 |
| 14 | muzikaal     | 0.99 | 3.47 | -0.9 |
| 14 | bergruimte   | 0.99 | 2.91 | 0.7  |
| 14 | inlapsen     | 0.99 | 3.39 | 0.8  |
| 14 | scooter      | 0.99 | 3.39 | 0.6  |
| 14 | platteland   | 0.99 | 4.28 | 0.5  |
| 14 | machteloos   | 0.99 | 3.83 | -0.7 |
| 14 | bonus        | 0.99 | 3.47 | -1.0 |
| 14 | bekroning    | 0.99 | 3.67 | -0.3 |
| 14 | schoolbel    | 0.99 | 2.74 | 0.1  |
| 14 | baksteen     | 0.99 | 3.79 | 0.7  |
| 14 | hulp         | 0.99 | 4.79 | 1.0  |
| 14 | opera        | 0.99 | 4.26 | -0.3 |
| 15 | wereldwonder | 0.99 | 3.40 | 0.6  |
| 15 | allereerste  | 0.99 | 3.91 | 0.2  |
| 15 | nietszeggend | 0.99 | 3.34 | -0.3 |
| 15 | overwerkt    | 0.99 | 3.25 | -0.7 |
| 15 | bevolkt      | 0.99 | 3.67 | -0.1 |
| 15 | taal         | 0.99 | 5.08 | 0.1  |
| 15 | onderkaak    | 0.99 | 3.18 | 0.4  |
| 15 | verdraagzaam | 0.99 | 3.26 | 0.6  |
| 15 | paniekzaaier | 0.99 | 2.61 | -0.8 |
| 15 | wegvoeren    | 0.99 | 3.11 | -0.4 |
| 15 | afbijten     | 0.99 | 3.18 | 0.2  |
| 15 | vogelpoep    | 0.99 | 2.86 | -0.7 |
| 15 | majoor       | 0.99 | 3.97 | -0.4 |
| 15 | heterdaad    | 0.99 | 3.42 | 0.5  |
| 15 | hetzelfde    | 0.99 | 5.03 | 0.8  |
| 15 | onafgebroken | 0.99 | 3.77 | -0.4 |
| 15 | zelfvoldaan  | 0.99 | 3.10 | -0.7 |
| 15 | terecht      | 0.99 | 4.78 | 0.5  |
| 15 | gala         | 0.99 | 3.41 | 0.4  |
| 15 | gemoedelijk  | 0.99 | 3.47 | -0.1 |
| 16 | uitsluiting  | 0.99 | 3.90 | 0.4  |
| 16 | griezelen    | 0.99 | 3.53 | 0.6  |
| 16 | krokus       | 0.99 | 3.30 | 0.1  |
| 16 | schuilhouden | 0.99 | 3.16 | -0.7 |
| 16 | illegaal     | 0.99 | 3.70 | -0.5 |
| 16 | goddelijk    | 0.99 | 3.66 | -0.1 |
| 16 | klinisch     | 0.99 | 3.57 | -0.8 |
| 16 | pieken       | 0.99 | 3.53 | -0.5 |

|    |                |      |      |      |
|----|----------------|------|------|------|
| 16 | reporter       | 0.99 | 3.43 | 0.5  |
| 16 | bovenop        | 0.99 | 4.01 | -0.4 |
| 16 | materieel      | 0.99 | 3.94 | 0.6  |
| 16 | kwaad          | 0.99 | 4.65 | 0.6  |
| 16 | vaarwel        | 0.99 | 3.76 | 0.1  |
| 16 | aandoenlijk    | 0.99 | 3.62 | 0.8  |
| 16 | handel         | 0.99 | 4.76 | 0.5  |
| 16 | kei            | 0.99 | 3.63 | 0.5  |
| 16 | verduidelijken | 0.99 | 3.60 | 0.4  |
| 16 | spelvorm       | 0.99 | 3.05 | 0.0  |
| 16 | doorprikken    | 0.99 | 3.25 | 0.9  |
| 16 | ingetogen      | 0.99 | 3.63 | 0.2  |
| 17 | schouwburg     | 0.99 | 3.91 | -0.9 |
| 17 | zeeleeuw       | 0.99 | 3.06 | 0.1  |
| 17 | douche         | 0.99 | 3.96 | 0.9  |
| 17 | pauzeren       | 0.99 | 3.20 | 0.5  |
| 17 | staatsgrens    | 0.99 | 2.74 | 0.2  |
| 17 | handhaven      | 0.99 | 4.18 | -0.1 |
| 17 | betasten       | 0.99 | 3.30 | -0.4 |
| 17 | index          | 0.99 | 4.60 | -0.2 |
| 17 | triest         | 0.99 | 3.74 | 0.2  |
| 17 | levensduur     | 0.99 | 3.48 | 0.7  |
| 17 | continentaal   | 0.99 | 3.34 | -1.0 |
| 17 | baviaan        | 0.99 | 3.18 | 1.0  |
| 17 | overtrekken    | 0.99 | 3.17 | 0.5  |
| 17 | draad          | 0.99 | 4.15 | 0.4  |
| 17 | aandurven      | 0.99 | 3.34 | -0.1 |
| 17 | oceaan         | 0.99 | 4.11 | 1.1  |
| 17 | optie          | 0.99 | 4.06 | 0.5  |
| 17 | onbevestigd    | 0.99 | 2.20 | -0.3 |
| 17 | biljart        | 0.99 | 3.27 | -0.4 |
| 17 | disco          | 0.99 | 3.42 | 0.1  |
| 18 | uitwijken      | 0.99 | 3.36 | 1.4  |
| 18 | boter          | 0.99 | 4.04 | 0.7  |
| 18 | luisterspel    | 0.99 | 3.38 | 0.3  |
| 18 | taille         | 0.99 | 3.72 | -0.5 |
| 18 | trakteren      | 0.99 | 3.38 | -0.4 |
| 18 | coma           | 0.99 | 3.58 | -1.5 |
| 18 | draaibaar      | 0.99 | 2.96 | -0.2 |
| 18 | tevergeefs     | 0.99 | 4.02 | 1.3  |
| 18 | kauwgom        | 0.99 | 3.39 | 0.3  |
| 18 | voortijdig     | 0.99 | 3.68 | -0.4 |
| 18 | perforator     | 0.99 | 2.82 | 0.5  |
| 18 | bemiddelaar    | 0.99 | 3.55 | 0.9  |
| 18 | psychiatrisch  | 0.99 | 3.51 | 0.6  |
| 18 | stilstaan      | 0.99 | 3.84 | 0.4  |
| 18 | achttien       | 0.99 | 4.14 | -1.1 |
| 18 | rugslag        | 0.99 | 2.35 | -0.4 |
| 18 | afscheiden     | 0.99 | 3.20 | 1.5  |
| 18 | miauwen        | 0.99 | 2.81 | -0.4 |
| 18 | opdagen        | 0.99 | 3.80 | -0.7 |
| 18 | opstopping     | 0.99 | 2.70 | -1.5 |
| 19 | verprutsen     | 0.99 | 2.77 | -0.1 |

|    |                |      |      |      |
|----|----------------|------|------|------|
| 19 | ondervoed      | 0.99 | 3.18 | 0.6  |
| 19 | drijfmat       | 0.99 | 3.11 | -0.5 |
| 19 | verdrinking    | 0.99 | 3.53 | 1.6  |
| 19 | surrealisme    | 0.99 | 3.47 | -1.4 |
| 19 | perfectioneren | 0.99 | 3.23 | 1.3  |
| 19 | spray          | 0.99 | 3.12 | -0.5 |
| 19 | pluizig        | 0.99 | 3.21 | 1.2  |
| 19 | regisseur      | 0.99 | 3.88 | 0.1  |
| 19 | nachtelijk     | 0.99 | 3.62 | -0.2 |
| 19 | waarin         | 0.99 | 5.27 | 0.1  |
| 19 | passer         | 0.99 | 4.00 | -0.6 |
| 19 | strekend       | 0.99 | 2.85 | -1.0 |
| 19 | berglucht      | 0.99 | 2.69 | 0.0  |
| 19 | vuistslag      | 0.99 | 3.34 | -0.5 |
| 19 | dubbele        | 0.99 | 4.44 | 0.7  |
| 19 | uithollen      | 0.99 | 2.96 | -0.9 |
| 19 | oogmasker      | 0.99 | 2.45 | 0.6  |
| 19 | uitrukken      | 0.99 | 2.98 | 0.2  |
| 19 | verloten       | 0.99 | 3.18 | -1.1 |
| 20 | manicure       | 0.99 | 3.02 | 1.2  |
| 20 | noordelijk     | 0.99 | 3.86 | 0.7  |
| 20 | wegscheren     | 0.99 | 2.02 | -0.8 |
| 20 | links          | 0.99 | 4.80 | 0.7  |
| 20 | golfspel       | 0.99 | 2.42 | -0.3 |
| 20 | friemelen      | 0.99 | 3.01 | -1.4 |
| 20 | naroepen       | 0.99 | 2.44 | 0.5  |
| 20 | satelliet      | 0.99 | 3.36 | -1.3 |
| 20 | omkieperen     | 0.99 | 2.05 | 0.3  |
| 20 | ravijn         | 0.99 | 3.62 | -1.0 |
| 20 | verfrommelen   | 0.99 | 2.35 | -0.8 |
| 20 | redenering     | 0.99 | 3.93 | 0.0  |
| 20 | afhangen       | 0.99 | 3.60 | 0.1  |
| 20 | inhuldigen     | 0.99 | 2.40 | 1.2  |
| 20 | mengbak        | 0.99 | 0.60 | -0.4 |
| 20 | wegglijden     | 0.99 | 3.21 | 1.7  |
| 20 | oogvocht       | 0.99 | 1.91 | 1.1  |
| 20 | herleiden      | 0.99 | 3.57 | 1.0  |
| 20 | parfum         | 0.99 | 3.66 | 0.9  |
| 20 | binnenste      | 0.99 | 3.84 | 0.9  |
| 21 | besef          | 0.99 | 4.42 | 1.9  |
| 21 | fotokopie      | 0.99 | 3.47 | -0.8 |
| 21 | consequent     | 0.99 | 3.95 | -0.4 |
| 21 | ongeliefd      | 0.99 | 2.57 | 0.7  |
| 21 | uitmoorden     | 0.99 | 3.09 | 0.0  |
| 21 | getik          | 0.99 | 3.33 | -1.1 |
| 21 | everzwijn      | 0.99 | 3.39 | 1.1  |
| 21 | sturing        | 0.99 | 3.58 | 0.5  |
| 21 | suggereren     | 0.99 | 3.87 | -1.1 |
| 21 | zitbank        | 0.99 | 2.87 | 1.1  |
| 21 | rabarber       | 0.99 | 3.23 | -1.0 |
| 21 | naad           | 0.99 | 3.32 | -1.3 |
| 21 | slimmerd       | 0.99 | 2.52 | 0.5  |
| 21 | kantlijn       | 0.99 | 3.49 | 1.4  |

|    |               |      |      |      |
|----|---------------|------|------|------|
| 21 | evenveel      | 0.99 | 4.06 | -0.8 |
| 21 | wantrouwig    | 0.99 | 3.47 | 1.5  |
| 21 | overig        | 0.99 | 3.85 | 0.1  |
| 21 | eigenares     | 0.99 | 3.50 | 0.4  |
| 21 | achterhaald   | 0.99 | 3.79 | 1.9  |
| 21 | onverwachts   | 0.99 | 3.72 | -1.0 |
| 22 | hooggespannen | 0.99 | 3.41 | -1.3 |
| 22 | inscannen     | 0.99 | 2.85 | 0.2  |
| 22 | beweeglijk    | 0.99 | 3.35 | -0.9 |
| 22 | houtvuur      | 0.99 | 3.07 | 0.9  |
| 22 | reukloos      | 0.99 | 2.61 | -1.2 |
| 22 | gekneusd      | 0.99 | 3.28 | 0.1  |
| 22 | wederzien     | 0.99 | 3.03 | 0.8  |
| 22 | spelmaker     | 0.99 | 2.11 | -0.2 |
| 22 | koffiekoek    | 0.99 | 2.04 | 1.4  |
| 22 | eindstuk      | 0.99 | 2.40 | -0.3 |
| 22 | mensachtig    | 0.99 | 2.59 | -0.8 |
| 22 | ontsnapping   | 0.99 | 3.75 | 2.0  |
| 22 | binnenlaten   | 0.99 | 3.19 | 1.7  |
| 22 | onbeweeglijk  | 0.99 | 3.56 | 1.0  |
| 22 | stembrief     | 0.99 | 1.76 | 1.6  |
| 22 | zomerzon      | 0.99 | 3.58 | -1.3 |
| 22 | basisteam     | 0.99 | 2.17 | 1.1  |
| 22 | meerekenen    | 0.99 | 2.79 | -0.5 |
| 22 | brulaap       | 0.99 | 3.71 | -0.2 |
| 22 | gestoei       | 0.99 | 2.72 | 1.3  |
| 23 | tekeer        | 0.98 | 3.64 | -1.4 |
| 23 | attribuut     | 0.98 | 3.38 | -0.4 |
| 23 | atleet        | 0.98 | 3.25 | -0.2 |
| 23 | baksel        | 0.98 | 2.92 | -1.8 |
| 23 | degraderen    | 0.98 | 3.00 | -0.4 |
| 23 | terugvliegen  | 0.98 | 2.52 | 0.0  |
| 23 | gewelddadig   | 0.98 | 3.63 | -0.5 |
| 23 | uiensaus      | 0.98 | 2.11 | -0.3 |
| 23 | verven        | 0.98 | 3.52 | 1.7  |
| 23 | cabine        | 0.98 | 3.46 | -2.2 |
| 23 | rondgaan      | 0.98 | 3.28 | 1.5  |
| 23 | festijn       | 0.98 | 3.26 | -0.5 |
| 23 | schermer      | 0.98 | 3.56 | -0.9 |
| 23 | grenslijn     | 0.98 | 2.97 | 0.8  |
| 23 | uitlezen      | 0.98 | 3.27 | 1.1  |
| 23 | genre         | 0.98 | 4.43 | 1.6  |
| 23 | oefenpop      | 0.98 | 0.85 | 1.2  |
| 23 | stamlid       | 0.98 | 2.50 | 0.0  |
| 23 | inplannen     | 0.98 | 2.97 | 0.7  |
| 23 | maagholte     | 0.98 | 0.90 | 0.1  |
| 24 | hendel        | 0.98 | 3.28 | -0.7 |
| 24 | onverslagen   | 0.98 | 2.36 | 0.9  |
| 24 | toereiken     | 0.98 | 2.13 | -1.0 |
| 24 | muildier      | 0.98 | 2.74 | 1.4  |
| 24 | erfgrond      | 0.98 | 2.16 | -1.0 |
| 24 | censuur       | 0.98 | 3.75 | -0.3 |
| 24 | topduel       | 0.98 | 0.30 | -0.5 |

|    |                |      |      |      |
|----|----------------|------|------|------|
| 24 | plaatsmaken    | 0.98 | 3.24 | -0.2 |
| 24 | steppe         | 0.98 | 3.63 | -2.6 |
| 24 | doorsteek      | 0.98 | 2.69 | 0.9  |
| 24 | nonchalant     | 0.98 | 3.71 | 2.3  |
| 24 | omspringen     | 0.98 | 3.24 | 0.1  |
| 24 | opklimmen      | 0.98 | 3.22 | 1.8  |
| 24 | waterpoel      | 0.98 | 2.85 | 0.4  |
| 24 | minimalistisch | 0.98 | 3.31 | 0.8  |
| 24 | pixel          | 0.98 | 3.26 | -1.5 |
| 24 | uitbuiten      | 0.98 | 2.49 | 1.2  |
| 24 | ongelooflijk   | 0.98 | 3.98 | 0.9  |
| 24 | naturalisme    | 0.98 | 3.58 | -0.1 |
| 24 | kippenpoot     | 0.98 | 2.38 | -1.5 |
| 25 | oefenbaan      | 0.98 | 1.34 | 0.0  |
| 25 | langverwacht   | 0.98 | 3.07 | 0.6  |
| 25 | mestput        | 0.98 | 2.21 | 0.6  |
| 25 | moedercel      | 0.98 | 1.65 | 0.7  |
| 25 | eindsom        | 0.98 | 0.95 | -2.1 |
| 25 | gesnauw        | 0.98 | 2.16 | -0.2 |
| 25 | afleider       | 0.98 | 2.39 | 0.8  |
| 25 | ingezoomd      | 0.98 | 3.21 | 2.5  |
| 25 | heenrit        | 0.98 | 1.56 | 0.1  |
| 25 | inwijden       | 0.98 | 3.21 | -0.4 |
| 25 | fitnessen      | 0.98 | 2.92 | 1.4  |
| 25 | loopwagen      | 0.98 | 2.39 | 1.5  |
| 25 | disfunctioneel | 0.98 | 3.00 | 0.3  |
| 25 | uitprinten     | 0.98 | 2.96 | -0.2 |
| 25 | instaan        | 0.98 | 3.40 | 1.6  |
| 25 | stijldans      | 0.98 | 2.21 | 1.2  |
| 25 | conceptueel    | 0.98 | 3.45 | 2.1  |
| 25 | visdraad       | 0.98 | 2.71 | 0.6  |
| 25 | procentteken   | 0.98 | 1.00 | -1.8 |
| 25 | appartement    | 0.98 | 4.16 | 0.6  |
| 26 | landdier       | 0.98 | 2.35 | 0.7  |
| 26 | vlakheid       | 0.98 | 2.89 | 0.3  |
| 26 | voeder         | 0.98 | 3.37 | -0.9 |
| 26 | leeskaart      | 0.98 | 2.67 | -1.8 |
| 26 | mozzarella     | 0.98 | 3.00 | 1.1  |
| 26 | hernoemen      | 0.98 | 2.13 | 0.2  |
| 26 | galopperen     | 0.98 | 3.14 | -0.9 |
| 26 | geaarzel       | 0.98 | 2.07 | -1.0 |
| 26 | immigreren     | 0.98 | 2.56 | -0.6 |
| 26 | irrigatie      | 0.98 | 3.12 | 1.1  |
| 26 | instructief    | 0.98 | 3.27 | 0.5  |
| 26 | ongeboeid      | 0.98 | 1.74 | 0.8  |
| 26 | graffiti       | 0.97 | 3.36 | -1.8 |
| 26 | bezitting      | 0.97 | 3.15 | -1.1 |
| 26 | geestigheid    | 0.97 | 3.29 | 1.5  |
| 26 | krijzen        | 0.97 | 3.56 | 2.0  |
| 26 | weegbaar       | 0.97 | 1.57 | -0.5 |
| 26 | stormlopen     | 0.97 | 2.16 | 3.2  |
| 26 | professor      | 0.97 | 4.44 | 2.7  |
| 26 | ledemaat       | 0.97 | 2.78 | 0.0  |

|    |                |      |      |      |
|----|----------------|------|------|------|
| 27 | rugsteun       | 0.97 | 2.10 | -1.2 |
| 27 | zwemslag       | 0.97 | 2.46 | -1.3 |
| 27 | verlener       | 0.97 | 2.33 | 0.8  |
| 27 | spaarcent      | 0.97 | 0.30 | 1.8  |
| 27 | polariteit     | 0.97 | 3.16 | 2.6  |
| 27 | instuderen     | 0.97 | 3.21 | 2.9  |
| 27 | klutsen        | 0.97 | 2.57 | 0.2  |
| 27 | vastliggen     | 0.97 | 2.94 | 0.9  |
| 27 | bestanddeel    | 0.97 | 3.52 | 0.7  |
| 27 | psychopathisch | 0.97 | 2.44 | 1.5  |
| 27 | aanreiken      | 0.97 | 3.37 | -0.6 |
| 27 | ongekeurd      | 0.97 | 0.85 | -1.7 |
| 27 | aanheffen      | 0.97 | 2.98 | 0.1  |
| 27 | flirterig      | 0.97 | 2.71 | 2.2  |
| 27 | oncomfortabel  | 0.97 | 2.97 | 0.7  |
| 27 | afwendig       | 0.97 | 2.67 | -1.7 |
| 27 | toegeeflijk    | 0.97 | 3.06 | 1.7  |
| 27 | zelfvoldoening | 0.97 | 2.35 | -0.3 |
| 27 | metabolisme    | 0.97 | 3.02 | 3.0  |
| 27 | omroeren       | 0.97 | 2.19 | 2.4  |
| 28 | inhalatie      | 0.97 | 2.50 | -3.4 |
| 28 | emigrante      | 0.97 | 3.72 | -2.0 |
| 28 | onstuimig      | 0.97 | 3.64 | -1.9 |
| 28 | onbeloond      | 0.97 | 2.11 | 1.3  |
| 28 | concurreren    | 0.97 | 3.59 | 1.8  |
| 28 | dennenappel    | 0.97 | 2.84 | -2.9 |
| 28 | vuilmaken      | 0.97 | 2.74 | -1.3 |
| 28 | gedachteloos   | 0.97 | 3.48 | -2.3 |
| 28 | daarentegen    | 0.97 | 4.62 | 2.3  |
| 28 | aflosser       | 0.97 | 1.41 | 2.3  |
| 28 | veehoeder      | 0.97 | 2.43 | 1.7  |
| 28 | opdeling       | 0.97 | 3.40 | 1.2  |
| 28 | immuun         | 0.97 | 3.37 | 0.1  |
| 28 | loshaken       | 0.97 | 2.00 | 1.1  |
| 28 | neerdalen      | 0.97 | 3.24 | 2.7  |
| 28 | toevoeren      | 0.97 | 2.10 | -2.7 |
| 28 | invoegsel      | 0.96 | 1.00 | 3.7  |
| 28 | verhoorder     | 0.96 | 2.42 | -2.3 |
| 28 | aanhaling      | 0.96 | 3.17 | 1.9  |
| 28 | gashendel      | 0.96 | 2.40 | 0.9  |
| 29 | betuiging      | 0.96 | 2.94 | 1.6  |
| 29 | heerszuchtig   | 0.96 | 2.80 | 0.3  |
| 29 | tennisnet      | 0.96 | 0.78 | 4.1  |
| 29 | reflectief     | 0.96 | 3.08 | 0.0  |
| 29 | openduwen      | 0.96 | 2.24 | 0.7  |
| 29 | vleien         | 0.96 | 3.18 | 0.9  |
| 29 | basket         | 0.96 | 3.24 | 4.3  |
| 29 | chagrijnig     | 0.96 | 3.51 | 2.5  |
| 29 | irriterend     | 0.96 | 2.85 | 3.5  |
| 29 | wervelen       | 0.96 | 3.00 | -0.9 |
| 29 | afspringen     | 0.96 | 2.80 | 3.2  |
| 29 | smoking        | 0.96 | 3.42 | 2.4  |
| 29 | naspreken      | 0.96 | 2.40 | -0.6 |

|    |                |      |      |      |
|----|----------------|------|------|------|
| 29 | ongelaagd      | 0.96 | 0.70 | -1.9 |
| 29 | liaan          | 0.96 | 2.75 | -1.3 |
| 29 | kieuw          | 0.96 | 3.18 | -0.6 |
| 29 | ongewogen      | 0.96 | 2.48 | -2.5 |
| 29 | boomzaag       | 0.96 | 1.85 | 3.9  |
| 29 | zwever         | 0.96 | 2.74 | -0.2 |
| 29 | continu        | 0.96 | 3.89 | 3.6  |
| 30 | ongebogen      | 0.96 | 1.97 | 0.3  |
| 30 | goedwillig     | 0.96 | 2.25 | -0.6 |
| 30 | recessief      | 0.96 | 2.41 | -2.8 |
| 30 | hoofdwet       | 0.96 | 2.50 | -1.1 |
| 30 | mascarpone     | 0.96 | 2.78 | 1.1  |
| 30 | zeepschuim     | 0.96 | 2.14 | 1.4  |
| 30 | leerpunt       | 0.96 | 2.78 | -1.2 |
| 30 | denkkader      | 0.96 | 3.24 | 2.8  |
| 30 | ontwaking      | 0.96 | 2.93 | -1.4 |
| 30 | nazingen       | 0.96 | 2.62 | 0.4  |
| 30 | formatteren    | 0.96 | 2.16 | 1.4  |
| 30 | filtratie      | 0.95 | 2.39 | -1.2 |
| 30 | knelling       | 0.95 | 1.88 | -0.1 |
| 30 | betreding      | 0.95 | 2.61 | 1.1  |
| 30 | huisgevel      | 0.95 | 2.13 | 3.1  |
| 30 | opdweilen      | 0.95 | 2.27 | -1.1 |
| 30 | anekdotisch    | 0.95 | 3.40 | -0.1 |
| 30 | douchegel      | 0.95 | 2.94 | 2.8  |
| 30 | pianospelen    | 0.95 | 3.37 | -2.9 |
| 30 | intypen        | 0.95 | 3.02 | -0.4 |
| 31 | jaargetij      | 0.95 | 2.76 | -0.7 |
| 31 | halsreikend    | 0.95 | 2.82 | 0.8  |
| 31 | afzakking      | 0.95 | 0.48 | -1.8 |
| 31 | skioord        | 0.95 | 3.00 | 1.9  |
| 31 | stukmaken      | 0.95 | 2.71 | 1.9  |
| 31 | inning         | 0.95 | 3.51 | 1.6  |
| 31 | netvormig      | 0.95 | 1.92 | 0.7  |
| 31 | toeleven       | 0.95 | 2.74 | -2.2 |
| 31 | afkoping       | 0.95 | 1.73 | -3.0 |
| 31 | extensief      | 0.95 | 3.02 | 3.1  |
| 31 | africhter      | 0.95 | 1.91 | 3.8  |
| 31 | applaudisseren | 0.95 | 3.08 | -4.4 |
| 31 | rempedaal      | 0.95 | 2.47 | 3.7  |
| 31 | lokduif        | 0.95 | 0.48 | 1.9  |
| 31 | hoogstand      | 0.95 | 2.43 | -0.1 |
| 31 | agressieveling | 0.95 | 2.21 | 4.4  |
| 31 | herbivoor      | 0.95 | 2.34 | 0.1  |
| 31 | poederig       | 0.94 | 2.11 | 3.2  |
| 31 | opstuwen       | 0.94 | 2.57 | 2.4  |
| 31 | bibliografie   | 0.94 | 4.51 | 5.2  |
| 32 | blubberen      | 0.94 | 1.72 | -2.5 |
| 32 | voorband       | 0.94 | 2.45 | -3.7 |
| 32 | danskoord      | 0.94 | 0.90 | 4.3  |
| 32 | adellijk       | 0.94 | 3.50 | -3.7 |
| 32 | jachtbuit      | 0.94 | 2.50 | 2.9  |
| 32 | stoppelhaar    | 0.94 | 1.81 | 1.5  |



|    |                |      |      |      |
|----|----------------|------|------|------|
| 32 | gespook        | 0.94 | 2.30 | -5.7 |
| 32 | watervlak      | 0.94 | 2.76 | 3.5  |
| 32 | afslijten      | 0.94 | 2.38 | 4.0  |
| 32 | verstoteling   | 0.94 | 2.34 | 4.4  |
| 32 | bijwoordelijk  | 0.94 | 2.31 | 1.7  |
| 32 | omranding      | 0.94 | 2.42 | -0.6 |
| 32 | afknagen       | 0.94 | 2.00 | 3.5  |
| 32 | verbitteren    | 0.94 | 2.44 | 2.1  |
| 32 | tegenin        | 0.94 | 3.35 | 0.8  |
| 32 | pasgetrouwd    | 0.94 | 3.08 | -3.1 |
| 32 | diezelfde      | 0.94 | 4.38 | 2.6  |
| 32 | aftreding      | 0.94 | 2.31 | 1.1  |
| 32 | fluwelig       | 0.94 | 2.63 | -4.3 |
| 32 | hondenren      | 0.94 | 1.88 | 2.6  |
| 33 | onnoembaar     | 0.93 | 2.64 | 6.5  |
| 33 | wrangheid      | 0.93 | 2.69 | 2.5  |
| 33 | hoogteligging  | 0.93 | 2.40 | 5.6  |
| 33 | afdruksel      | 0.93 | 0.90 | 2.1  |
| 33 | buigpunt       | 0.93 | 1.63 | 1.9  |
| 33 | desintegratie  | 0.93 | 3.41 | 5.2  |
| 33 | avonduur       | 0.93 | 2.68 | -6.7 |
| 33 | militarisme    | 0.93 | 3.29 | 3.4  |
| 33 | afkapping      | 0.93 | 2.15 | 2.7  |
| 33 | afvoering      | 0.93 | 2.07 | 0.5  |
| 33 | inkomst        | 0.93 | 3.19 | 2.9  |
| 33 | glansloos      | 0.93 | 2.56 | 5.8  |
| 33 | daartegenover  | 0.93 | 3.72 | 4.8  |
| 33 | opmeting       | 0.93 | 2.85 | 6.9  |
| 33 | sensorisch     | 0.93 | 2.65 | -4.5 |
| 33 | jeukerig       | 0.93 | 1.86 | -3.2 |
| 33 | overmand       | 0.93 | 3.67 | -1.3 |
| 33 | pyromanie      | 0.93 | 2.08 | 5.3  |
| 33 | stereotypering | 0.93 | 3.20 | -0.6 |
| 33 | verdergaan     | 0.93 | 3.41 | 5.7  |
| 34 | gezagsvol      | 0.92 | 0.90 | 3.8  |
| 34 | volbouwen      | 0.92 | 2.66 | -4.8 |
| 34 | flatteren      | 0.92 | 2.49 | 3.1  |
| 34 | martelarij     | 0.92 | 0.85 | 4.4  |
| 34 | ingeroest      | 0.92 | 1.58 | 0.5  |
| 34 | halsader       | 0.92 | 1.78 | -4.8 |
| 34 | symbolist      | 0.92 | 3.33 | -0.3 |
| 34 | onderbenut     | 0.92 | 2.50 | 3.8  |
| 34 | pronker        | 0.92 | 3.02 | 2.9  |
| 34 | verreikend     | 0.92 | 2.44 | 1.9  |
| 34 | reglement      | 0.92 | 3.98 | 7.1  |
| 34 | trotsheid      | 0.92 | 2.43 | 1.3  |
| 34 | scepticisme    | 0.92 | 3.37 | 5.1  |
| 34 | kluisteren     | 0.92 | 3.08 | -0.5 |
| 34 | noodcel        | 0.92 | 0.00 | 2.1  |
| 34 | sisklank       | 0.92 | 1.95 | 4.6  |
| 34 | collecteur     | 0.91 | 2.75 | 0.6  |
| 34 | ineengedrongen | 0.91 | 2.29 | -0.7 |
| 34 | nawinter       | 0.91 | 2.03 | 1.2  |

|    |                 |      |      |      |
|----|-----------------|------|------|------|
| 34 | hiertussen      | 0.91 | 3.12 | 2.1  |
| 35 | convergeren     | 0.91 | 2.97 | 4.8  |
| 35 | aanstotelijk    | 0.91 | 2.34 | 3.9  |
| 35 | introversie     | 0.91 | 2.85 | 6.7  |
| 35 | makheid         | 0.91 | 1.82 | -0.9 |
| 35 | inzetting       | 0.91 | 2.59 | 0.5  |
| 35 | stoeierij       | 0.91 | 0.48 | -7.5 |
| 35 | daarvandaan     | 0.91 | 3.46 | -1.3 |
| 35 | langzaamaan     | 0.91 | 3.53 | 2.7  |
| 35 | liefelijk       | 0.91 | 3.19 | -1.5 |
| 35 | zeegolf         | 0.91 | 2.26 | 2.3  |
| 35 | tembaar         | 0.91 | 0.78 | -0.2 |
| 35 | bejagen         | 0.91 | 2.57 | -4.1 |
| 35 | kwadrateren     | 0.91 | 2.01 | -0.9 |
| 35 | uitpeuteren     | 0.90 | 1.62 | 3.7  |
| 35 | vanglijn        | 0.90 | 1.89 | 6.2  |
| 35 | omhelsd         | 0.90 | 3.39 | 2.2  |
| 35 | binnenhuis      | 0.90 | 3.50 | -2.9 |
| 35 | gerook          | 0.90 | 2.04 | -4.1 |
| 35 | plooiel         | 0.90 | 0.85 | 2.3  |
| 35 | vraagzin        | 0.90 | 2.57 | 7.5  |
| 36 | verdrogen       | 0.90 | 2.87 | -7.8 |
| 36 | majoriteit      | 0.90 | 1.73 | 4.9  |
| 36 | baatzucht       | 0.90 | 2.45 | -0.9 |
| 36 | doodsvonnissen  | 0.90 | 2.88 | 4.1  |
| 36 | bladerig        | 0.90 | 0.60 | 3.6  |
| 36 | smaden          | 0.90 | 2.55 | -0.8 |
| 36 | hakkelig        | 0.90 | 2.20 | -7.8 |
| 36 | aanstuwen       | 0.90 | 0.78 | 5.2  |
| 36 | volmaking       | 0.90 | 2.92 | 0.7  |
| 36 | oliegas         | 0.89 | 0.70 | -0.7 |
| 36 | doelnet         | 0.89 | 0.00 | 2.8  |
| 36 | verstrakken     | 0.89 | 2.77 | 7.1  |
| 36 | kladderig       | 0.89 | 0.60 | -6.1 |
| 36 | epidemiologie   | 0.89 | 3.29 | 0.9  |
| 36 | propeller       | 0.89 | 2.95 | 5.7  |
| 36 | uitdoving       | 0.89 | 2.45 | 7.8  |
| 36 | voorfilm        | 0.89 | 2.51 | -1.4 |
| 36 | aanvulsel       | 0.89 | 0.48 | 2.7  |
| 36 | onromantisch    | 0.89 | 2.51 | 0.7  |
| 36 | anatomist       | 0.89 | 2.64 | 3.2  |
| 37 | uitlegger       | 0.88 | 2.98 | -2.2 |
| 37 | wikkeling       | 0.88 | 3.17 | -0.2 |
| 37 | veldrat         | 0.88 | 0.78 | 1.9  |
| 37 | bidder          | 0.88 | 3.04 | -4.4 |
| 37 | tenietgaan      | 0.88 | 2.84 | 2.7  |
| 37 | geschermd       | 0.88 | 1.81 | -2.0 |
| 37 | boekrol         | 0.88 | 3.10 | 3.4  |
| 37 | veldnaam        | 0.88 | 2.40 | 4.5  |
| 37 | inluizen        | 0.88 | 0.30 | -4.7 |
| 37 | linkerrij       | 0.88 | 1.66 | 0.8  |
| 37 | standaardisatie | 0.88 | 3.30 | -5.0 |
| 37 | schraalte       | 0.88 | 1.97 | 0.1  |

|    |                  |      |      |      |
|----|------------------|------|------|------|
| 37 | xenograaf        | 0.88 | 0.30 | 3.5  |
| 37 | cilindrisch      | 0.87 | 2.72 | -1.2 |
| 37 | afsteek          | 0.87 | 1.79 | -2.7 |
| 37 | halftij          | 0.87 | 0.78 | -1.5 |
| 37 | ertussenin       | 0.87 | 3.29 | -0.4 |
| 37 | dialectiek       | 0.87 | 3.48 | 1.2  |
| 37 | wegpraten        | 0.87 | 2.01 | 2.4  |
| 37 | klaaghuis        | 0.87 | 0.30 | 0.0  |
| 38 | antagonistisch   | 0.87 | 2.49 | 3.6  |
| 38 | admissie         | 0.87 | 2.74 | 3.7  |
| 38 | drijfslaag       | 0.87 | 0.60 | -1.3 |
| 38 | vraagpunt        | 0.87 | 2.60 | -4.8 |
| 38 | blijgeestig      | 0.86 | 1.00 | 2.3  |
| 38 | floepen          | 0.86 | 2.59 | 3.6  |
| 38 | stamtijd         | 0.86 | 0.30 | 3.2  |
| 38 | harigheid        | 0.86 | 2.27 | -1.4 |
| 38 | nesteling        | 0.86 | 2.73 | -2.3 |
| 38 | treinziek        | 0.86 | 0.00 | 5.5  |
| 38 | lofprijzend      | 0.86 | 1.57 | 3.2  |
| 38 | ijswinter        | 0.86 | 0.30 | 3.9  |
| 38 | roesmiddel       | 0.85 | 2.45 | 3.4  |
| 38 | onberecht        | 0.85 | 0.48 | 1.8  |
| 38 | zwemluier        | 0.85 | 0.85 | -0.7 |
| 38 | graviteit        | 0.85 | 1.82 | 2.8  |
| 38 | polijster        | 0.85 | 2.09 | 2.3  |
| 38 | smijter          | 0.85 | 2.75 | 4.1  |
| 38 | rumoeren         | 0.85 | 2.08 | -4.9 |
| 38 | bevanging        | 0.85 | 0.70 | 4.0  |
| 39 | verwijven        | 0.85 | 0.60 | -5.7 |
| 39 | montering        | 0.85 | 2.29 | -2.0 |
| 39 | collectivistisch | 0.84 | 2.58 | 6.1  |
| 39 | verjaging        | 0.84 | 2.38 | 1.9  |
| 39 | lengtecirkel     | 0.84 | 0.48 | -5.0 |
| 39 | droogten         | 0.84 | 1.75 | -3.8 |
| 39 | kielen           | 0.84 | 3.08 | -1.1 |
| 39 | duvelen          | 0.84 | 2.12 | -4.6 |
| 39 | scheper          | 0.84 | 3.21 | 1.3  |
| 39 | graveersel       | 0.84 | 0.70 | 3.8  |
| 39 | oervogel         | 0.83 | 2.01 | -0.8 |
| 39 | zeiker           | 0.83 | 2.13 | 6.4  |
| 39 | exotisme         | 0.83 | 3.44 | 8.3  |
| 39 | onbegaafd        | 0.83 | 1.92 | 4.9  |
| 39 | telboek          | 0.83 | 3.76 | 5.1  |
| 39 | polytheen        | 0.83 | 0.95 | -4.4 |
| 39 | aanvoegen        | 0.83 | 0.60 | -2.4 |
| 39 | kletserij        | 0.83 | 0.48 | -4.6 |
| 39 | aanrennen        | 0.83 | 3.05 | -0.9 |
| 39 | bekakken         | 0.83 | 0.60 | 0.3  |
| 40 | epsilon          | 0.83 | 3.26 | -2.6 |
| 40 | structuralist    | 0.83 | 2.97 | 1.2  |
| 40 | zoekvak          | 0.83 | 2.53 | 6.5  |
| 40 | werkarm          | 0.82 | 0.48 | 2.9  |
| 40 | remhendel        | 0.82 | 0.85 | 0.5  |

|    |                |      |      |      |
|----|----------------|------|------|------|
| 40 | brouwhuis      | 0.82 | 2.51 | 0.6  |
| 40 | aanzetsel      | 0.82 | 0.70 | 2.0  |
| 40 | nestbak        | 0.82 | 0.00 | 5.6  |
| 40 | versmeden      | 0.82 | 0.85 | -2.9 |
| 40 | alreeds        | 0.82 | 3.01 | -6.3 |
| 40 | bakwagen       | 0.81 | 0.95 | 3.4  |
| 40 | visruim        | 0.81 | 0.78 | 4.7  |
| 40 | strengelen     | 0.81 | 2.12 | -4.3 |
| 40 | opbieding      | 0.81 | 0.30 | 3.1  |
| 40 | afzepen        | 0.81 | 0.00 | -2.3 |
| 40 | hefvlak        | 0.81 | 0.00 | 4.9  |
| 40 | respectief     | 0.81 | 1.85 | 0.3  |
| 40 | persman        | 0.81 | 2.47 | 2.0  |
| 40 | meerderwaardig | 0.81 | 1.77 | 2.6  |
| 40 | doorwerkt      | 0.81 | 3.36 | -1.2 |
| 41 | omstralen      | 0.80 | 1.45 | -2.8 |
| 41 | zatheid        | 0.80 | 2.16 | 5.6  |
| 41 | spokerig       | 0.80 | 0.30 | 1.1  |
| 41 | omwerking      | 0.80 | 3.06 | -0.7 |
| 41 | grommer        | 0.80 | 1.77 | -4.8 |
| 41 | preektoon      | 0.80 | 2.56 | 3.5  |
| 41 | blauwheid      | 0.80 | 2.00 | -1.1 |
| 41 | keiachtig      | 0.79 | 0.30 | -2.7 |
| 41 | groenheid      | 0.79 | 2.33 | -5.2 |
| 41 | benijder       | 0.79 | 0.95 | -0.4 |
| 41 | proximaal      | 0.79 | 2.36 | -6.5 |
| 41 | oplaaiing      | 0.79 | 1.00 | 2.0  |
| 41 | paleografie    | 0.78 | 3.14 | 5.4  |
| 41 | selecteur      | 0.78 | 2.37 | -5.8 |
| 41 | loszinnig      | 0.78 | 1.81 | 2.9  |
| 41 | inwaaien       | 0.78 | 1.82 | 1.5  |
| 41 | carbolineum    | 0.78 | 3.16 | -9.1 |
| 41 | narijden       | 0.78 | 0.60 | 2.7  |
| 41 | messnee        | 0.78 | 0.85 | -3.6 |
| 41 | valkerij       | 0.78 | 3.11 | 2.4  |
| 42 | tokken         | 0.78 | 2.27 | 4.3  |
| 42 | snijdsel       | 0.77 | 1.70 | -6.8 |
| 42 | spinnig        | 0.77 | 0.85 | -0.9 |
| 42 | ecstasy        | 0.77 | 3.22 | 0.8  |
| 42 | zinsbedrog     | 0.77 | 2.82 | -5.1 |
| 42 | rotskunst      | 0.77 | 2.31 | 0.4  |
| 42 | zaakkundig     | 0.77 | 1.81 | 1.1  |
| 42 | instulping     | 0.77 | 1.65 | 8.0  |
| 42 | halfdek        | 0.77 | 2.20 | -3.4 |
| 42 | routeren       | 0.76 | 1.54 | -4.2 |
| 42 | rationale      | 0.76 | 3.40 | -1.0 |
| 42 | xenofilie      | 0.76 | 2.16 | 0.9  |
| 42 | planterij      | 0.76 | 0.90 | -3.5 |
| 42 | repulsie       | 0.76 | 1.60 | 9.7  |
| 42 | doorgankelijk  | 0.76 | 1.88 | 5.8  |
| 42 | rioleren       | 0.76 | 0.30 | -3.2 |
| 42 | dedicatie      | 0.76 | 2.82 | 9.9  |
| 42 | chromen        | 0.75 | 2.69 | -8.6 |

|    |                |      |      |      |
|----|----------------|------|------|------|
| 42 | doldriftig     | 0.75 | 2.03 | 3.6  |
| 42 | statica        | 0.75 | 2.85 | -1.1 |
| 43 | boogarm        | 0.74 | 0.00 | 1.1  |
| 43 | periculeus     | 0.74 | 1.90 | 3.8  |
| 43 | zuursel        | 0.74 | 1.85 | -1.6 |
| 43 | depreciatie    | 0.74 | 2.86 | 7.9  |
| 43 | verderfenis    | 0.74 | 0.90 | -0.9 |
| 43 | traverseren    | 0.74 | 1.00 | 10.1 |
| 43 | plagiator      | 0.74 | 2.47 | 0.2  |
| 43 | wasvat         | 0.74 | 1.67 | 4.5  |
| 43 | vistrip        | 0.74 | 0.60 | -3.0 |
| 43 | woeling        | 0.74 | 2.54 | 2.5  |
| 43 | reticulair     | 0.73 | 1.88 | 1.3  |
| 43 | notulant       | 0.73 | 1.94 | -4.5 |
| 43 | conciliatie    | 0.73 | 2.71 | 3.7  |
| 43 | zandkop        | 0.73 | 0.48 | 1.6  |
| 43 | kwallig        | 0.73 | 1.00 | 0.8  |
| 43 | prothesis      | 0.72 | 2.24 | 6.3  |
| 43 | hymnisch       | 0.72 | 2.35 | -3.4 |
| 43 | titelen        | 0.72 | 2.06 | 1.1  |
| 43 | idiomatisch    | 0.72 | 2.67 | 2.2  |
| 43 | keisteen       | 0.71 | 2.35 | -2.6 |
| 44 | bezemklas      | 0.71 | 1.94 | -3.7 |
| 44 | codeur         | 0.71 | 2.02 | 2.4  |
| 44 | ijsbeen        | 0.70 | 0.60 | -8.0 |
| 44 | uitham         | 0.70 | 2.36 | 0.0  |
| 44 | uitkeping      | 0.70 | 0.00 | 9.3  |
| 44 | onberijmd      | 0.70 | 0.85 | -6.9 |
| 44 | witoog         | 0.69 | 2.25 | -4.3 |
| 44 | snottig        | 0.69 | 0.30 | 5.6  |
| 44 | subsidiariteit | 0.69 | 3.25 | -4.6 |
| 44 | uitvangen      | 0.69 | 0.60 | -1.1 |
| 44 | stribbeling    | 0.69 | 0.70 | 4.0  |
| 44 | spikkelen      | 0.69 | 0.78 | 2.5  |
| 44 | gloeijing      | 0.69 | 2.08 | 10.1 |
| 44 | endemie        | 0.69 | 2.14 | 2.8  |
| 44 | afraken        | 0.69 | 2.36 | 2.0  |
| 44 | humiliatie     | 0.68 | 0.30 | -1.4 |
| 44 | zijschip       | 0.68 | 1.71 | 5.9  |
| 44 | inbuiging      | 0.68 | 0.70 | 2.2  |
| 44 | aangieten      | 0.68 | 0.85 | 0.8  |
| 44 | gezwem         | 0.68 | 0.00 | 0.0  |
| 45 | knevelwet      | 0.68 | 0.48 | -4.1 |
| 45 | armengoed      | 0.68 | 0.30 | -5.9 |
| 45 | oculeren       | 0.67 | 1.91 | -7.3 |
| 45 | cholerisch     | 0.67 | 2.71 | 2.6  |
| 45 | morrig         | 0.67 | 0.60 | 2.9  |
| 45 | defectief      | 0.67 | 1.76 | -3.6 |
| 45 | omdijken       | 0.67 | 0.90 | 5.8  |
| 45 | etheen         | 0.66 | 2.34 | 3.4  |
| 45 | pokkig         | 0.66 | 0.60 | 4.8  |
| 45 | atomist        | 0.66 | 2.33 | 7.6  |
| 45 | histologie     | 0.66 | 2.99 | 0.7  |

|    |             |      |      |      |
|----|-------------|------|------|------|
| 45 | geschuind   | 0.66 | 0.90 | 0.2  |
| 45 | plankerig   | 0.66 | 0.48 | -8.3 |
| 45 | gruizelen   | 0.65 | 0.78 | 4.2  |
| 45 | vetblad     | 0.64 | 1.91 | -1.7 |
| 45 | blokmaker   | 0.64 | 1.75 | -0.1 |
| 45 | hoornuil    | 0.64 | 0.70 | 6.5  |
| 45 | smelterig   | 0.64 | 0.30 | 6.5  |
| 45 | pijniger    | 0.64 | 0.78 | -2.2 |
| 45 | nazin       | 0.63 | 2.24 | 6.9  |
| 46 | pervasief   | 0.63 | 2.05 | 5.2  |
| 46 | volgbod     | 0.62 | 0.60 | 1.8  |
| 46 | beboomd     | 0.62 | 0.85 | 6.0  |
| 46 | aspot       | 0.62 | 0.95 | 2.4  |
| 46 | nagewas     | 0.62 | 0.95 | 3.0  |
| 46 | wierig      | 0.61 | 0.85 | -5.2 |
| 46 | residueel   | 0.61 | 1.86 | 5.4  |
| 46 | ontlezing   | 0.61 | 3.21 | -5.4 |
| 46 | dampaal     | 0.61 | 0.30 | -1.4 |
| 46 | uitloving   | 0.60 | 1.88 | -1.0 |
| 46 | zegging     | 0.60 | 3.21 | 1.1  |
| 46 | zakpijp     | 0.60 | 1.88 | 3.5  |
| 46 | rijzing     | 0.60 | 2.36 | 1.9  |
| 46 | graduale    | 0.60 | 2.79 | 1.3  |
| 46 | resumptie   | 0.60 | 2.63 | -3.0 |
| 46 | ebstand     | 0.59 | 0.60 | 4.8  |
| 46 | teelvocht   | 0.59 | 0.78 | 0.2  |
| 46 | essayeur    | 0.59 | 2.31 | -3.9 |
| 46 | auctionaris | 0.59 | 0.30 | -4.0 |
| 46 | uurcirkel   | 0.59 | 0.78 | -1.8 |
| 47 | ribbeling   | 0.58 | 0.95 | 7.6  |
| 47 | grootbek    | 0.58 | 1.49 | 4.3  |
| 47 | loopkat     | 0.57 | 0.85 | -3.3 |
| 47 | wiegeling   | 0.57 | 1.95 | 3.9  |
| 47 | jaagpaard   | 0.57 | 1.00 | -6.3 |
| 47 | binomiaal   | 0.57 | 1.98 | 6.8  |
| 47 | grovelijk   | 0.57 | 2.17 | -2.5 |
| 47 | rondworm    | 0.57 | 2.52 | 0.8  |
| 47 | syllogisme  | 0.57 | 2.70 | 5.5  |
| 47 | paaivis     | 0.56 | 0.00 | 2.3  |
| 47 | perifrase   | 0.55 | 2.32 | 2.7  |
| 47 | monisme     | 0.55 | 3.16 | -8.1 |
| 47 | manisme     | 0.55 | 2.16 | 8.0  |
| 47 | eoliet      | 0.55 | 0.00 | 3.4  |
| 47 | pepsine     | 0.54 | 2.12 | -2.4 |
| 47 | automatie   | 0.54 | 2.55 | 10.4 |
| 47 | septiem     | 0.54 | 2.32 | 4.5  |
| 47 | afwassing   | 0.54 | 1.97 | -4.8 |
| 47 | abortief    | 0.54 | 2.01 | 8.3  |
| 47 | nabeurs     | 0.54 | 0.70 | 7.2  |
| 48 | verpappen   | 0.53 | 0.78 | -0.1 |
| 48 | apoloog     | 0.53 | 0.48 | 2.7  |
| 48 | gesteeld    | 0.53 | 2.54 | 2.1  |
| 48 | noppig      | 0.53 | 0.30 | 2.7  |

|    |               |      |      |      |
|----|---------------|------|------|------|
| 48 | proponent     | 0.52 | 3.14 | 3.2  |
| 48 | bijboek       | 0.52 | 0.48 | 3.7  |
| 48 | uitvalarm     | 0.51 | 0.00 | 1.8  |
| 48 | filigram      | 0.51 | 1.90 | 0.5  |
| 48 | brachiaal     | 0.51 | 0.70 | 7.4  |
| 48 | zeebaak       | 0.50 | 0.00 | -3.1 |
| 48 | geblaseerd    | 0.50 | 2.18 | 4.2  |
| 48 | insolentie    | 0.50 | 1.97 | 9.9  |
| 48 | plaveiing     | 0.49 | 0.30 | 2.0  |
| 48 | rekkerig      | 0.49 | 0.30 | 7.1  |
| 48 | farceren      | 0.48 | 0.90 | 6.1  |
| 48 | kannenkijker  | 0.48 | 0.30 | 0.7  |
| 48 | begieren      | 0.48 | 0.30 | -8.0 |
| 48 | spinaap       | 0.48 | 0.30 | 7.1  |
| 48 | releveren     | 0.48 | 2.64 | 8.0  |
| 48 | valentie      | 0.48 | 2.70 | 3.9  |
| 49 | minheid       | 0.47 | 0.78 | -3.0 |
| 49 | ijsazijn      | 0.47 | 1.00 | 2.5  |
| 49 | omnevelen     | 0.47 | 0.00 | 6.2  |
| 49 | dakvoet       | 0.47 | 1.96 | -5.6 |
| 49 | betomen       | 0.46 | 1.80 | 2.3  |
| 49 | atactisch     | 0.46 | 0.90 | 1.1  |
| 49 | warrelen      | 0.46 | 2.35 | 6.0  |
| 49 | euvelmoed     | 0.46 | 1.72 | -1.9 |
| 49 | prelatuur     | 0.46 | 2.46 | 5.6  |
| 49 | dolkop        | 0.46 | 0.95 | 2.8  |
| 49 | antigen       | 0.45 | 2.73 | 7.4  |
| 49 | apoplexie     | 0.45 | 2.22 | 5.0  |
| 49 | narcotine     | 0.45 | 0.60 | 3.6  |
| 49 | eutrofie      | 0.45 | 0.00 | 5.5  |
| 49 | spiets        | 0.45 | 2.09 | -1.4 |
| 49 | titratie      | 0.44 | 2.00 | 4.1  |
| 49 | autarchie     | 0.43 | 1.98 | 7.8  |
| 49 | brombas       | 0.42 | 0.30 | -2.3 |
| 49 | comorbiditeit | 0.42 | 3.03 | 5.9  |
| 49 | erythrocyt    | 0.42 | 2.21 | 3.1  |
| 50 | altist        | 0.41 | 2.48 | -9.7 |
| 50 | convocaat     | 0.41 | 1.81 | 0.7  |
| 50 | unicaat       | 0.40 | 1.93 | 0.0  |
| 50 | hematurie     | 0.40 | 1.99 | 2.2  |
| 50 | assoneren     | 0.40 | 1.79 | 9.6  |
| 50 | wrikriem      | 0.40 | 0.48 | 0.1  |
| 50 | endotheel     | 0.39 | 2.07 | 1.4  |
| 50 | lijmoor       | 0.39 | 0.00 | 6.7  |
| 50 | deciel        | 0.38 | 2.05 | -0.7 |
| 50 | erratisch     | 0.38 | 1.56 | -6.0 |
| 50 | abolitie      | 0.38 | 2.24 | 9.8  |
| 50 | deputaat      | 0.38 | 0.78 | 4.9  |
| 50 | elysisch      | 0.37 | 2.69 | -4.6 |
| 50 | autotypie     | 0.37 | 2.72 | 3.4  |
| 50 | aasbloem      | 0.37 | 0.00 | 3.7  |
| 50 | tartaan       | 0.37 | 2.07 | 5.1  |
| 50 | speelaard     | 0.37 | 0.78 | -2.1 |

|    |            |      |      |      |
|----|------------|------|------|------|
| 50 | torus      | 0.36 | 2.80 | 6.5  |
| 50 | ataxie     | 0.36 | 2.39 | 9.6  |
| 50 | fijnte     | 0.35 | 1.86 | 1.4  |
| 51 | anomaal    | 0.33 | 0.95 | 4.0  |
| 51 | optatief   | 0.33 | 1.95 | -2.7 |
| 51 | boraat     | 0.33 | 0.85 | 0.7  |
| 51 | distaal    | 0.32 | 2.49 | 6.9  |
| 51 | letaal     | 0.32 | 2.14 | 3.2  |
| 51 | asvaal     | 0.31 | 0.00 | 8.7  |
| 51 | stagflatie | 0.30 | 2.15 | 7.7  |
| 51 | argentaan  | 0.30 | 0.30 | 4.3  |
| 51 | discant    | 0.30 | 2.82 | -1.8 |
| 51 | maroniet   | 0.29 | 0.90 | 8.6  |
| 51 | zwekkast   | 0.29 | 2.29 | 2.1  |
| 51 | psalterium | 0.29 | 3.02 | 6.7  |
| 51 | idiolect   | 0.29 | 2.66 | -1.1 |
| 51 | foneem     | 0.29 | 2.67 | 2.9  |
| 51 | onderzaat  | 0.28 | 0.85 | -4.0 |
| 51 | schrepel   | 0.28 | 0.78 | -1.3 |
| 51 | fosfatase  | 0.28 | 2.04 | 5.5  |
| 51 | braveren   | 0.27 | 2.06 | 6.6  |
| 51 | gomarist   | 0.27 | 1.90 | -7.8 |
| 51 | apostaat   | 0.27 | 2.26 | 1.7  |
| 52 | thyrsus    | 0.26 | 2.06 | -2.2 |
| 52 | rossinant  | 0.26 | 1.81 | 2.3  |
| 52 | felonie    | 0.26 | 1.62 | 4.5  |
| 52 | avalist    | 0.25 | 0.70 | 7.9  |
| 52 | tarok      | 0.25 | 2.41 | -0.4 |
| 52 | emfatisch  | 0.25 | 2.29 | 9.2  |
| 52 | premolaar  | 0.25 | 2.24 | -0.5 |
| 52 | bevitten   | 0.23 | 1.53 | 0.5  |
| 52 | austraal   | 0.23 | 1.43 | 3.9  |
| 52 | pateen     | 0.22 | 2.11 | 5.4  |
| 52 | joggelen   | 0.22 | 0.30 | 6.9  |
| 52 | ergon      | 0.22 | 2.70 | 8.8  |
| 52 | saffiaan   | 0.21 | 0.78 | -0.4 |
| 52 | mariaal    | 0.21 | 2.54 | 9.8  |
| 52 | camarilla  | 0.21 | 2.76 | -3.1 |
| 52 | brozem     | 0.21 | 0.85 | -4.9 |
| 52 | meliniet   | 0.21 | 0.00 | 3.5  |
| 52 | muleta     | 0.20 | 2.11 | 1.1  |
| 52 | suppliek   | 0.20 | 2.22 | -1.8 |
| 52 | samoreus   | 0.19 | 0.78 | -3.6 |
| 53 | actinisch  | 0.18 | 0.60 | 3.1  |
| 53 | galoet     | 0.18 | 2.00 | -5.5 |
| 53 | chiliasme  | 0.18 | 2.85 | 2.3  |
| 53 | agiotage   | 0.18 | 0.70 | -2.7 |
| 53 | strictuur  | 0.18 | 1.52 | -2.8 |
| 53 | carieus    | 0.17 | 1.36 | 4.3  |
| 53 | thiofeen   | 0.16 | 0.60 | 4.7  |
| 53 | aterling   | 0.15 | 2.19 | -3.3 |
| 53 | engelin    | 0.15 | 2.17 | 2.1  |
| 53 | pepton     | 0.14 | 0.60 | 5.1  |



|    |           |      |      |      |
|----|-----------|------|------|------|
| 53 | aalgeer   | 0.14 | 0.48 | 1.8  |
| 53 | spondee   | 0.13 | 2.37 | 1.6  |
| 53 | bol kaf   | 0.13 | 0.30 | -0.1 |
| 53 | smotsen   | 0.13 | 0.00 | 1.9  |
| 53 | liniment  | 0.13 | 1.00 | 0.5  |
| 53 | rizofoor  | 0.13 | 0.30 | -0.6 |
| 53 | douarie   | 0.13 | 1.93 | -5.1 |
| 53 | amfioen   | 0.13 | 2.03 | 0.7  |
| 53 | fanaal    | 0.12 | 2.69 | -0.2 |
| 53 | ritornel  | 0.11 | 0.78 | 4.7  |
| 54 | galigaan  | 0.10 | 1.87 | 2.0  |
| 54 | pollevij  | 0.09 | 0.00 | -2.4 |
| 54 | teemsen   | 0.09 | 0.70 | -0.1 |
| 54 | bekkeneel | 0.08 | 2.36 | 3.1  |
| 54 | boerterij | 0.08 | 0.95 | -0.9 |
| 54 | fieren    | 0.08 | 1.94 | 1.9  |
| 54 | samaar    | 0.07 | 3.61 | 0.6  |
| 54 | zelateur  | 0.07 | 0.48 | 0.3  |
| 54 | toetoepe  | 0.06 | 2.18 | 0.4  |
| 54 | babiroesa | 0.06 | 0.70 | -2.0 |
| 54 | ramin     | 0.06 | 2.79 | 1.4  |
| 54 | badjing   | 0.05 | 2.00 | -1.4 |
| 54 | tmesis    | 0.05 | 2.57 | 1.9  |
| 54 | streks    | 0.04 | 0.70 | 3.7  |
| 54 | kamsin    | 0.03 | 0.30 | 0.3  |
| 54 | wimber    | 0.03 | 2.91 | 1.8  |
| 54 | eemien    | 0.03 | 2.30 | 0.0  |
| 54 | fijfel    | 0.03 | 0.00 | 1.5  |
| 54 | twatwa    | 0.02 | 0.78 | 0.5  |
| 54 | alkanna   | 0.02 | 1.76 | 0.0  |

Run 1: Non-words

| <b>Non-word</b> | <b>% correct<br/>Belgium</b> | <b>% correct<br/>Netherlands</b> | <b>Difference<br/>Belgium/<br/>Netherlands</b> |
|-----------------|------------------------------|----------------------------------|------------------------------------------------|
| aaldijding      | 93.9                         | 96.5                             | -2.7                                           |
| aandrapt        | 91.7                         | 92.1                             | -0.3                                           |
| aanstildelijk   | 95.4                         | 92.2                             | 3.1                                            |
| aantrilijk      | 97.1                         | 97.7                             | -0.6                                           |
| aanvaten        | 97.6                         | 96.3                             | 1.2                                            |
| aarkien         | 97.1                         | 96.6                             | 0.6                                            |
| aarmaring       | 97.4                         | 97.9                             | -0.4                                           |
| aartieken       | 96                           | 96.4                             | -0.4                                           |
| aatslijving     | 94.8                         | 94.8                             | 0                                              |
| aatsloging      | 97.8                         | 97.7                             | 0.1                                            |
| aatspoving      | 96.6                         | 96.1                             | 0.6                                            |
| abbeschaagt     | 96                           | 96.5                             | -0.5                                           |
| achtelkeurt     | 97.6                         | 97.7                             | -0.1                                           |
| achteteel       | 96                           | 96.3                             | -0.3                                           |
| adartlijk       | 97.1                         | 97.4                             | -0.3                                           |
| adartuur        | 91.1                         | 90.4                             | 0.6                                            |

|               |      |      |      |
|---------------|------|------|------|
| aderrief      | 93.9 | 91.5 | 2.4  |
| admedaren     | 93   | 95.1 | -2.1 |
| afflist       | 90.3 | 90   | 0.3  |
| afkotelijk    | 94.3 | 94.3 | 0    |
| afmoeving     | 96.6 | 97.1 | -0.5 |
| afwilsen      | 90.1 | 93.8 | -3.7 |
| akkebruikt    | 96.7 | 97   | -0.3 |
| akkoevelijk   | 90.7 | 95.6 | -4.9 |
| allervans     | 93.4 | 93.2 | 0.2  |
| allizelaar    | 95.8 | 96.2 | -0.4 |
| alsprengen    | 95.8 | 93.4 | 2.4  |
| altantiventie | 91.9 | 93.8 | -1.9 |
| amenlaar      | 93.1 | 93.9 | -0.8 |
| ameping       | 97   | 95.2 | 1.8  |
| amhaalding    | 96   | 97   | -1   |
| anderfermeren | 91.2 | 90.4 | 0.8  |
| andrijnlijk   | 96.2 | 97.5 | -1.2 |
| ankentement   | 95.4 | 90.2 | 5.2  |
| annevirie     | 94.8 | 92.6 | 2.1  |
| antowecheie   | 97.2 | 97.4 | -0.1 |
| anwaad        | 95.9 | 96.2 | -0.3 |
| appirtalief   | 95.2 | 93.6 | 1.6  |
| archietnist   | 90.5 | 92.7 | -2.2 |
| arelvlasie    | 97.8 | 96.2 | 1.6  |
| astenuldig    | 94.8 | 97.7 | -2.9 |
| asterscheid   | 96   | 96.8 | -0.8 |
| asubukatie    | 92.8 | 90.8 | 2    |
| atser         | 93.7 | 93   | 0.7  |
| atteen        | 91.6 | 95.6 | -4.1 |
| barrawemaren  | 97.3 | 97.5 | -0.2 |
| batveeto      | 97.3 | 97.6 | -0.2 |
| beanggeelden  | 97.1 | 97.5 | -0.4 |
| bebrijler     | 96.1 | 97.7 | -1.6 |
| bedeuriging   | 93   | 94.2 | -1.2 |
| bedijgbaar    | 92.1 | 93.5 | -1.4 |
| bedoerden     | 92.5 | 95.8 | -3.2 |
| begerving     | 95.2 | 93   | 2.2  |
| begolen       | 93.1 | 90.3 | 2.7  |
| beharmes      | 94.2 | 93.6 | 0.7  |
| bekleigen     | 90.5 | 92.1 | -1.5 |
| beklig        | 91.5 | 95.4 | -3.9 |
| beknisseed    | 93.1 | 93.1 | 0    |
| belelden      | 94.7 | 94.9 | -0.2 |
| belleemheid   | 92.4 | 93.5 | -1   |
| belongelaar   | 93.1 | 95.6 | -2.5 |
| bemettalijk   | 96.6 | 95.4 | 1.3  |
| bemieger      | 95.1 | 93.1 | 2.1  |
| bemille       | 96.7 | 96.9 | -0.2 |
| bemonner      | 97.2 | 96.4 | 0.8  |
| bemuzaarde    | 91.8 | 91.1 | 0.7  |
| beneliaan     | 91.1 | 92   | -0.8 |
| benild        | 93.2 | 95.2 | -2.1 |

|                |      |      |      |
|----------------|------|------|------|
| benipofaant    | 93.8 | 96.7 | -3   |
| beoorlaats     | 95.4 | 94.3 | 1    |
| bepegdeld      | 95.6 | 95.6 | 0.1  |
| berdoep        | 96.5 | 97.4 | -0.9 |
| berduidelijk   | 94.9 | 93.1 | 1.7  |
| berdussen      | 97.6 | 94.6 | 3    |
| bergastenis    | 95.8 | 94.4 | 1.4  |
| bergegen       | 96.7 | 97.1 | -0.3 |
| bergeinen      | 91.1 | 92.3 | -1.3 |
| berkerden      | 96.9 | 94.5 | 2.3  |
| berkeuvelijlen | 94.2 | 97   | -2.8 |
| berkikken      | 96.9 | 95.1 | 1.7  |
| berklarren     | 93.1 | 95.6 | -2.5 |
| berklemen      | 94.6 | 94.1 | 0.5  |
| berlongen      | 97.3 | 95.4 | 1.9  |
| bermeerd       | 94.2 | 91.9 | 2.3  |
| bermieken      | 91.4 | 94.5 | -3.1 |
| bermuiden      | 90.2 | 92.9 | -2.8 |
| beronming      | 97.3 | 97.2 | 0.1  |
| berschiegen    | 96.3 | 96.5 | -0.2 |
| berschieven    | 96.1 | 96.9 | -0.7 |
| berschippend   | 95.5 | 95.4 | 0.1  |
| berspag        | 95.1 | 97.6 | -2.5 |
| berstaling     | 92.1 | 93.8 | -1.7 |
| berstessen     | 96   | 95.2 | 0.9  |
| bervloezing    | 93.7 | 97   | -3.3 |
| berzweffen     | 97.7 | 97.3 | 0.4  |
| beslaren       | 90.9 | 93.3 | -2.3 |
| beutstigen     | 96   | 96.1 | -0.1 |
| bevloetedis    | 95.8 | 97.9 | -2   |
| bevrielden     | 96   | 96   | -0.1 |
| beziefd        | 91.2 | 95.3 | -4.1 |
| blacht         | 96.1 | 95.8 | 0.4  |
| blijns         | 91.9 | 97.7 | -5.8 |
| blomie         | 93.6 | 94.8 | -1.2 |
| blusto         | 96.1 | 97.3 | -1.3 |
| boegtaam       | 91.5 | 92.7 | -1.2 |
| bokenlien      | 96.9 | 95.4 | 1.4  |
| bonspiljet     | 96.8 | 94.6 | 2.2  |
| boppelen       | 93.9 | 92.5 | 1.4  |
| brap           | 97.8 | 96.3 | 1.5  |
| brerine        | 93.4 | 96.8 | -3.4 |
| brijpen        | 94.4 | 93.6 | 0.7  |
| brirkeling     | 95.7 | 97.8 | -2.1 |
| broffeteur     | 95.7 | 94.5 | 1.2  |
| brorkelen      | 93.8 | 96.9 | -3.1 |
| buidendonten   | 97.5 | 97.1 | 0.4  |
| buntesk        | 90.5 | 95.3 | -4.8 |
| buraak         | 93.5 | 95.1 | -1.6 |
| caflonsis      | 92.2 | 97.4 | -5.3 |
| cagstentieel   | 93   | 92.4 | 0.6  |
| cemepisch      | 91.7 | 93.8 | -2.1 |

|               |      |      |      |
|---------------|------|------|------|
| chovibijn     | 93.6 | 95.1 | -1.5 |
| clormisch     | 92.2 | 92.6 | -0.4 |
| conbonsaal    | 90.4 | 91.6 | -1.2 |
| conlipent     | 90.5 | 95.1 | -4.6 |
| constrimtie   | 92   | 90.9 | 1.1  |
| coptact       | 97   | 97.6 | -0.6 |
| cordinegen    | 94.9 | 95.4 | -0.5 |
| cordinu       | 91.7 | 91.7 | 0    |
| creromaren    | 92.1 | 92.3 | -0.3 |
| crimodirateit | 94.8 | 95   | -0.2 |
| criturg       | 90   | 93   | -3   |
| cunze         | 97   | 97   | -0.1 |
| curgeef       | 95.2 | 97.4 | -2.2 |
| dadegantie    | 93.6 | 95.2 | -1.6 |
| darfortant    | 95.4 | 96.5 | -1.2 |
| darmakent     | 95.1 | 97.1 | -2   |
| datsim        | 95.5 | 95.9 | -0.4 |
| dattelen      | 90.9 | 90.8 | 0.1  |
| dederaar      | 92.7 | 92.7 | 0    |
| deibel        | 93.2 | 90.5 | 2.8  |
| dekeel        | 94.4 | 93.8 | 0.6  |
| dertigeloog   | 95.5 | 93.6 | 2    |
| dierin        | 94.8 | 92.5 | 2.3  |
| dinst         | 90.6 | 95.2 | -4.5 |
| diowelisch    | 97.5 | 96.1 | 1.4  |
| dipiadier     | 93.6 | 93.8 | -0.2 |
| dobitoseran   | 91.8 | 93.4 | -1.7 |
| doeperij      | 91.5 | 94.1 | -2.5 |
| dolstueel     | 95.3 | 93.3 | 2    |
| dommeratuur   | 93.5 | 90.6 | 2.9  |
| doning        | 92.1 | 95.4 | -3.3 |
| doolwist      | 95.2 | 94.2 | 0.9  |
| dralk         | 94.8 | 95.3 | -0.6 |
| drookperrie   | 96.3 | 96.4 | -0.1 |
| drootsing     | 94.1 | 96.4 | -2.4 |
| drozing       | 93.2 | 91.6 | 1.6  |
| duskaal       | 93.3 | 95.1 | -1.8 |
| ebelij        | 93.5 | 94.5 | -0.9 |
| ebiblom       | 95.7 | 97.6 | -1.9 |
| echterijn     | 92.1 | 92.9 | -0.8 |
| eeverniper    | 97.1 | 97.3 | -0.1 |
| efgactief     | 97.1 | 97.6 | -0.5 |
| eggenent      | 91.7 | 92.7 | -1.1 |
| eitelbaafde   | 97.9 | 97.7 | 0.2  |
| ekkrosief     | 91.2 | 92.9 | -1.6 |
| ekmisch       | 92.9 | 94.6 | -1.7 |
| ekpillantie   | 96   | 96.9 | -0.9 |
| ekwarzeren    | 97.1 | 97.4 | -0.3 |
| elbotomenteel | 91.8 | 92.2 | -0.4 |
| emeddeel      | 94   | 93.6 | 0.4  |
| enilitaan     | 90.7 | 95.8 | -5.1 |
| ennilie       | 92.6 | 93.8 | -1.1 |

|                |      |      |      |
|----------------|------|------|------|
| enstubonen     | 95   | 95.4 | -0.4 |
| entineuk       | 94.2 | 95.8 | -1.6 |
| erferaan       | 92.8 | 93.5 | -0.7 |
| erkeur         | 92.1 | 93.9 | -1.8 |
| erotaad        | 93.6 | 91.1 | 2.5  |
| espoter        | 90.9 | 92.2 | -1.3 |
| estrevroleur   | 93.9 | 90.5 | 3.4  |
| etdentrowateit | 97.3 | 97.5 | -0.2 |
| evijs          | 95.5 | 97.8 | -2.2 |
| ezaktel        | 97.1 | 97.8 | -0.7 |
| fagteur        | 94.9 | 95.1 | -0.2 |
| faredrafie     | 93.7 | 95.5 | -1.9 |
| fatijd         | 95.7 | 97.9 | -2.1 |
| feiker         | 93.2 | 94.5 | -1.3 |
| fibrattaren    | 92   | 95.5 | -3.6 |
| fivortripie    | 94.4 | 95.4 | -1.1 |
| floluirijk     | 97.5 | 96.8 | 0.8  |
| flosperen      | 90   | 92.3 | -2.2 |
| fluleuse       | 94.2 | 96.1 | -1.8 |
| frarsen        | 94.5 | 94.2 | 0.3  |
| frieperd       | 92.1 | 95   | -2.9 |
| fudurense      | 91.3 | 95.1 | -3.8 |
| gattiaal       | 92.6 | 92.8 | -0.2 |
| geballelijk    | 94.1 | 95.9 | -1.8 |
| geeslook       | 91.8 | 93.2 | -1.4 |
| gejorarte      | 97.4 | 97.6 | -0.1 |
| geldel         | 92.2 | 93.4 | -1.2 |
| geoordelijk    | 92.9 | 95.2 | -2.3 |
| gerdrulding    | 96.8 | 97.8 | -1   |
| gerpierzal     | 97.5 | 95.8 | 1.7  |
| gerplaaian     | 97.2 | 97   | 0.2  |
| gersnökkend    | 92.7 | 96.3 | -3.6 |
| gersoveling    | 96.9 | 95.3 | 1.6  |
| gerstieding    | 94.4 | 94.9 | -0.6 |
| gertogelijk    | 91.3 | 95.6 | -4.3 |
| gesiel         | 92.5 | 93.4 | -1   |
| geslook        | 91.4 | 93.1 | -1.7 |
| gewuksvijn     | 97.4 | 97.8 | -0.5 |
| glarkier       | 95.4 | 96.1 | -0.6 |
| gloken         | 95.2 | 96.4 | -1.1 |
| godderijn      | 92.8 | 90   | 2.8  |
| gorm           | 92.6 | 94.4 | -1.8 |
| grageloog      | 91.9 | 94.4 | -2.6 |
| grankig        | 91.9 | 94.5 | -2.6 |
| grapisie       | 97.5 | 95.6 | 1.9  |
| grarenisch     | 96.4 | 96   | 0.4  |
| grarieel       | 92.8 | 92.2 | 0.7  |
| grateusel      | 92.2 | 92.1 | 0.1  |
| grazist        | 95   | 91.7 | 3.3  |
| griktaat       | 96.9 | 97.5 | -0.6 |
| groegoding     | 97.2 | 97.1 | 0.1  |
| haledak        | 94.6 | 94.8 | -0.3 |
| halluitend     | 90.7 | 95.7 | -5   |

|               |      |      |      |
|---------------|------|------|------|
| haltoen       | 93.5 | 95   | -1.5 |
| hamp          | 90.4 | 91.7 | -1.3 |
| hapiék        | 92.4 | 92.3 | 0.1  |
| hapueel       | 93.1 | 92.2 | 0.9  |
| helvertoling  | 90.7 | 90.5 | 0.2  |
| hijmalaar     | 90.5 | 96.2 | -5.7 |
| hoemen        | 92.2 | 90.9 | 1.3  |
| hogment       | 96.7 | 94.9 | 1.8  |
| holinge       | 93.1 | 93.4 | -0.4 |
| honcretie     | 92.2 | 93.4 | -1.2 |
| howeliteit    | 94   | 96.5 | -2.5 |
| huistvrij     | 93.1 | 91.8 | 1.2  |
| humaluur      | 90.9 | 94.9 | -4   |
| hundes        | 92.7 | 94   | -1.3 |
| ibbens        | 92.1 | 93.8 | -1.6 |
| idarliteit    | 90.7 | 95.4 | -4.7 |
| idditent      | 94   | 96.1 | -2.1 |
| igirabrie     | 97.8 | 97.1 | 0.7  |
| ijkmilly      | 97.2 | 97.1 | 0.2  |
| ijmgarig      | 95.2 | 97.5 | -2.2 |
| ijseraan      | 94   | 95.6 | -1.6 |
| iltrentaat    | 93.2 | 94.2 | -1   |
| infalbaren    | 95.9 | 95.6 | 0.2  |
| injutome      | 96.2 | 96.7 | -0.5 |
| inlolaan      | 97.8 | 96.4 | 1.4  |
| inophaarbaar  | 97.3 | 96   | 1.3  |
| inschubelijk  | 92.3 | 93.5 | -1.2 |
| insiraren     | 96.4 | 97.7 | -1.3 |
| inslaetie     | 95.8 | 96   | -0.2 |
| inspuimig     | 90.4 | 92.8 | -2.4 |
| intallinaal   | 90.1 | 90.8 | -0.7 |
| intundie      | 92.5 | 91.6 | 0.9  |
| inustogen     | 93.2 | 95.3 | -2.2 |
| jalmis        | 93.6 | 96.3 | -2.8 |
| jempet        | 96.1 | 96.3 | -0.2 |
| joming        | 91.9 | 96.3 | -4.4 |
| jorstifuge    | 97.6 | 97.8 | -0.2 |
| juweraren     | 94.9 | 96.5 | -1.5 |
| kamiliaal     | 91.1 | 90.8 | 0.3  |
| kantimaak     | 94.6 | 93.7 | 0.9  |
| kanvelijkheid | 95.8 | 97   | -1.3 |
| kapogerie     | 95   | 93.4 | 1.6  |
| karpes        | 90.1 | 90.2 | 0    |
| karzien       | 93.3 | 94.7 | -1.4 |
| kasisist      | 90.8 | 90.5 | 0.2  |
| kaspeligisch  | 94.2 | 93   | 1.2  |
| kavinentose   | 91.8 | 94.1 | -2.2 |
| kedelijks     | 96.3 | 97.1 | -0.8 |
| kedeling      | 92.9 | 93.2 | -0.4 |
| keima         | 94.5 | 95.4 | -1   |
| kenselein     | 95.4 | 95.3 | 0    |
| kenvelopen    | 97.2 | 97.2 | 0    |
| kettident     | 95.6 | 93.7 | 1.9  |

|                |      |      |      |
|----------------|------|------|------|
| keumen         | 90.7 | 90.3 | 0.4  |
| keumige        | 93.4 | 92.3 | 1.1  |
| kiddermaad     | 93.3 | 94.7 | -1.4 |
| killenhoos     | 90.4 | 94.8 | -4.4 |
| kilselen       | 95.3 | 96.3 | -1   |
| kinterogie     | 91.8 | 92.5 | -0.7 |
| klal           | 97.6 | 97.1 | 0.5  |
| klechts        | 96.7 | 96.9 | -0.2 |
| kleffier       | 92.7 | 92.2 | 0.5  |
| kleimig        | 91.8 | 95   | -3.2 |
| klellig        | 96.8 | 96.6 | 0.1  |
| klondslad      | 97.8 | 97   | 0.8  |
| kluinteloos    | 90.7 | 93.2 | -2.5 |
| knimmelig      | 93.2 | 94.7 | -1.6 |
| kobudant       | 91.1 | 91.9 | -0.8 |
| kofersief      | 94.7 | 97.4 | -2.7 |
| koluctie       | 90.6 | 94.4 | -3.9 |
| konbagieren    | 90.4 | 96.7 | -6.3 |
| kortalon       | 94.4 | 90.3 | 4.1  |
| kosdeeld       | 94   | 95   | -1   |
| koselaat       | 93.4 | 91.9 | 1.5  |
| kovioen        | 92.9 | 93   | 0    |
| krijterschap   | 91.7 | 92.3 | -0.7 |
| krogherti      | 97.4 | 97   | 0.4  |
| krosiaal       | 93.1 | 95   | -1.9 |
| kruffen        | 91.1 | 97.7 | -6.7 |
| krurf          | 96.8 | 96.8 | 0.1  |
| krurzig        | 96.9 | 96.6 | 0.3  |
| kuchtaan       | 94.7 | 97   | -2.4 |
| kuvor          | 95.9 | 95.3 | 0.6  |
| kwantonelief   | 93.9 | 97.4 | -3.5 |
| kwarzend       | 90.1 | 93.1 | -3   |
| kwiecht        | 94   | 93.5 | 0.5  |
| kwijger        | 91.2 | 96.1 | -4.9 |
| lacerdelijk    | 96.9 | 97.4 | -0.5 |
| ladramage      | 92.6 | 93.6 | -1   |
| lafus          | 93   | 95   | -2   |
| lagadilistisch | 90   | 92   | -2   |
| largelings     | 95.3 | 94.9 | 0.4  |
| larton         | 92.3 | 93.4 | -1.1 |
| larzieking     | 97.4 | 96   | 1.4  |
| lategatuur     | 94.1 | 90.6 | 3.5  |
| leglaant       | 97.3 | 97.8 | -0.5 |
| lekredie       | 94.3 | 95.4 | -1.1 |
| lelomakatie    | 95.8 | 94.4 | 1.3  |
| lepij          | 92.1 | 94.3 | -2.3 |
| letmiek        | 92.2 | 95.8 | -3.6 |
| levading       | 97.8 | 97.3 | 0.5  |
| ligeggie       | 95.5 | 96.8 | -1.3 |
| ligeggisch     | 95.3 | 97.3 | -2   |
| linkotioneel   | 94.8 | 96.3 | -1.5 |
| liprema        | 90.2 | 92.9 | -2.7 |

|              |      |      |      |
|--------------|------|------|------|
| lislekening  | 97.5 | 97.7 | -0.2 |
| locaan       | 92.1 | 95.4 | -3.3 |
| lokkel       | 90.3 | 91.4 | -1.1 |
| lommon       | 94   | 97.6 | -3.7 |
| lopimicaan   | 90.3 | 93.3 | -3   |
| lorma        | 90.7 | 93   | -2.3 |
| lunstemoles  | 97.2 | 97.1 | 0.1  |
| lurlerig     | 95.7 | 97.7 | -2   |
| maafsheid    | 97.3 | 96.1 | 1.1  |
| maarvaloos   | 95.1 | 95.4 | -0.3 |
| mabaat       | 92.9 | 95.5 | -2.6 |
| maberet      | 90   | 92.9 | -2.9 |
| machteteel   | 93.1 | 94.4 | -1.2 |
| maddibar     | 96.2 | 96.7 | -0.5 |
| maloen       | 91.7 | 92   | -0.3 |
| mardij       | 90.3 | 93.3 | -3   |
| marwetisch   | 93.4 | 92.4 | 1    |
| mavil        | 95.7 | 96.2 | -0.5 |
| maving       | 94.4 | 94.3 | 0.1  |
| meetdelijk   | 95.7 | 97.2 | -1.5 |
| meeuwelin    | 92.4 | 95.1 | -2.8 |
| megelijk     | 90.1 | 90.7 | -0.6 |
| megels       | 90.3 | 90.6 | -0.3 |
| mekjen       | 97.5 | 97.6 | -0.1 |
| mekontaan    | 92.3 | 95.2 | -3   |
| menetens     | 96   | 95.5 | 0.4  |
| meponteel    | 95   | 95.3 | -0.3 |
| meunel       | 96   | 94.9 | 1    |
| miaak        | 94.2 | 94.8 | -0.6 |
| mialaltisch  | 91.6 | 90.4 | 1.2  |
| mienerlijk   | 90.3 | 90.2 | 0.1  |
| miomenten    | 94.3 | 94.4 | -0.1 |
| mokelijk     | 91.7 | 97   | -5.4 |
| momp         | 93.5 | 96   | -2.5 |
| mosmonol     | 94.4 | 96.5 | -2.1 |
| nakelieur    | 97.3 | 96.5 | 0.9  |
| nakenstitie  | 95   | 94.9 | 0.1  |
| narzesiteit  | 91.6 | 93.6 | -2   |
| nastrijls    | 93.8 | 94.6 | -0.8 |
| natalping    | 90.7 | 93.7 | -3   |
| neemteperlof | 97.7 | 97.9 | -0.2 |
| neezat       | 97.6 | 97.3 | 0.3  |
| nenje        | 97.5 | 97.7 | -0.1 |
| nettiler     | 96.3 | 96.3 | 0    |
| niekeling    | 91.9 | 95.6 | -3.7 |
| nijtel       | 91   | 91.3 | -0.4 |
| nogen        | 92.6 | 93.2 | -0.6 |
| noger        | 94.5 | 97.1 | -2.6 |
| nojoost      | 97.6 | 97   | 0.6  |
| norgading    | 94.4 | 96.3 | -1.9 |
| noromares    | 93.9 | 91.8 | 2.1  |
| norpens      | 95.3 | 96   | -0.7 |



|               |      |      |      |
|---------------|------|------|------|
| nostenkie     | 97   | 97.6 | -0.6 |
| numelnetiek   | 95.4 | 96.4 | -1   |
| obkatief      | 93.9 | 95.7 | -1.8 |
| ochterep      | 97.1 | 97.4 | -0.3 |
| odpesie       | 92.9 | 96.1 | -3.3 |
| odstuik       | 96.9 | 97.4 | -0.5 |
| ogernabaring  | 93.7 | 95.8 | -2.1 |
| ogin          | 96.1 | 96.4 | -0.2 |
| okdrimaat     | 94.5 | 93.5 | 1    |
| omelvlieden   | 96   | 97.9 | -1.9 |
| omluring      | 94.6 | 94.5 | 0.1  |
| ompegeten     | 96.2 | 97.7 | -1.5 |
| omraarts      | 96.3 | 94.8 | 1.5  |
| omrundend     | 92.5 | 94.2 | -1.6 |
| onciarettisch | 90.7 | 91.5 | -0.7 |
| ongebels      | 94.6 | 96.6 | -2   |
| onjamming     | 95.3 | 96.5 | -1.2 |
| onlardelijk   | 93.8 | 96.3 | -2.5 |
| onsmallen     | 94.7 | 94.8 | -0.1 |
| onsolig       | 96.4 | 96.9 | -0.5 |
| onsonbalijk   | 96.7 | 97.1 | -0.5 |
| onspepen      | 97.3 | 97.3 | 0    |
| ontjazzen     | 96   | 95.2 | 0.9  |
| ontplurben    | 95.1 | 95.7 | -0.6 |
| ontreensmaar  | 97.5 | 96   | 1.5  |
| onvepeilerd   | 95.4 | 96   | -0.6 |
| oorpoop       | 96.7 | 95.3 | 1.4  |
| ootpeed       | 97.3 | 96.7 | 0.6  |
| opdrontie     | 90.8 | 92.5 | -1.8 |
| oppumetie     | 92.4 | 92.2 | 0.2  |
| orjetier      | 92   | 95.7 | -3.7 |
| orvassantie   | 90.7 | 94.8 | -4.1 |
| otfectief     | 97.6 | 97.6 | -0.1 |
| otwate        | 97.3 | 97.9 | -0.7 |
| overgeels     | 91   | 91.4 | -0.4 |
| ozoef         | 96   | 96.9 | -0.9 |
| pabroos       | 94.4 | 92.3 | 2.1  |
| padot         | 90.3 | 91.4 | -1.1 |
| paknodraal    | 94.5 | 95.1 | -0.6 |
| pakpaustine   | 92.2 | 94.7 | -2.6 |
| pamiefel      | 96   | 96.5 | -0.6 |
| pappief       | 96   | 97.2 | -1.2 |
| patabeleren   | 91   | 92.1 | -1.1 |
| pating        | 90.3 | 90.2 | 0.1  |
| pattedrag     | 94.7 | 97.1 | -2.4 |
| pechtizing    | 97.3 | 97.7 | -0.4 |
| pegaadade     | 97.2 | 97.7 | -0.5 |
| pelm          | 91.2 | 92.4 | -1.2 |
| pespenbaren   | 97.3 | 97.2 | 0.1  |
| pewarante     | 93.2 | 97.4 | -4.3 |
| pijtelen      | 92.8 | 90.1 | 2.7  |
| pimestarie    | 91.5 | 93.9 | -2.4 |

|             |      |      |      |
|-------------|------|------|------|
| pindermaad  | 93.1 | 96.1 | -3.1 |
| pinikent    | 95.7 | 95.5 | 0.2  |
| pizeur      | 94.3 | 91.7 | 2.6  |
| pizing      | 97   | 97   | 0    |
| plambing    | 97.5 | 97.4 | 0    |
| plapisitie  | 90.5 | 93.5 | -2.9 |
| pleuts      | 92.5 | 93   | -0.5 |
| plurarinaan | 95.9 | 93.3 | 2.6  |
| podenschap  | 96   | 95.4 | 0.6  |
| pogendaart  | 95.3 | 96.4 | -1   |
| pomite      | 93.7 | 94.4 | -0.7 |
| ponenlijk   | 94.4 | 95.8 | -1.4 |
| posstaan    | 95   | 96.6 | -1.6 |
| precuguur   | 90.6 | 92.1 | -1.5 |
| prerartief  | 92.5 | 91   | 1.5  |
| preriment   | 92.4 | 91.1 | 1.2  |
| presiel     | 90.4 | 93.3 | -2.8 |
| prijnenceld | 97.4 | 97   | 0.4  |
| prijper     | 96.6 | 95.5 | 1.1  |
| primpel     | 92.2 | 91   | 1.1  |
| priomme     | 93.2 | 93.8 | -0.6 |
| prip        | 94.5 | 93.5 | 1    |
| prokomoren  | 92.2 | 95.9 | -3.7 |
| pronippe    | 93.9 | 97.4 | -3.5 |
| pronvettist | 94.3 | 92.4 | 1.9  |
| prootsing   | 93.9 | 93.5 | 0.3  |
| prurt       | 94.5 | 96   | -1.5 |
| puintenij   | 94.7 | 92.6 | 2    |
| radalver    | 94.3 | 95.1 | -0.8 |
| ralding     | 91.3 | 90.2 | 1.1  |
| ramaxed     | 97.9 | 97.7 | 0.2  |
| rangrictie  | 93   | 92.8 | 0.2  |
| raterliet   | 93.3 | 95.9 | -2.6 |
| ratmelaar   | 96.1 | 96   | 0    |
| recronaren  | 93   | 92.7 | 0.3  |
| refronleren | 91.5 | 90.4 | 1.2  |
| relabijn    | 90.1 | 91   | -0.9 |
| remiketie   | 93.9 | 95.1 | -1.2 |
| renodregen  | 93.4 | 97.6 | -4.2 |
| rerdataat   | 92.4 | 95.2 | -2.8 |
| rerck       | 95.6 | 97.5 | -1.9 |
| resenloren  | 94   | 96   | -2   |
| reugen      | 90   | 90.8 | -0.9 |
| rijterzaals | 96.1 | 96.6 | -0.5 |
| risanente   | 90.8 | 94.8 | -4.1 |
| rokeking    | 97.1 | 97.3 | -0.2 |
| rolebram    | 95.7 | 97.3 | -1.6 |
| ronbioneel  | 95.2 | 95.1 | 0.1  |
| ronnotutie  | 90.2 | 96.2 | -6   |
| roportiek   | 93.2 | 93.5 | -0.4 |
| rortrormig  | 97.9 | 97.6 | 0.4  |
| rumrokking  | 92.1 | 97   | -4.9 |

|               |      |      |      |
|---------------|------|------|------|
| safetantie    | 92.3 | 93.7 | -1.4 |
| sanoei        | 97.4 | 95.1 | 2.3  |
| sastiem       | 91.4 | 91.8 | -0.4 |
| schevem       | 96.5 | 97.8 | -1.3 |
| schiettiikt   | 94.3 | 91.9 | 2.4  |
| schijgswerf   | 95.8 | 95.7 | 0    |
| schos         | 90.9 | 91.8 | -0.9 |
| schroerverei  | 91.8 | 94.3 | -2.5 |
| schroetster   | 90.4 | 91.9 | -1.5 |
| schubes       | 90.3 | 92.3 | -2.1 |
| schurding     | 92   | 95.3 | -3.3 |
| sefamziet     | 95.3 | 94.7 | 0.6  |
| sekker        | 92.6 | 97.5 | -4.9 |
| sekortiek     | 90.5 | 94.1 | -3.6 |
| senigen       | 95.8 | 96   | -0.2 |
| siltoberen    | 92.5 | 93.5 | -0.9 |
| simperechtend | 93.4 | 94.4 | -1   |
| slaam         | 92.7 | 93   | -0.3 |
| slabiaan      | 91.7 | 95.1 | -3.4 |
| slatetie      | 94   | 95.6 | -1.6 |
| slimmelen     | 92.8 | 92.4 | 0.4  |
| smelieus      | 94.7 | 95.8 | -1.1 |
| smemalig      | 94.5 | 96   | -1.5 |
| smeumeren     | 93.3 | 90.9 | 2.5  |
| smeven        | 93.1 | 95.1 | -2   |
| sneem         | 95.7 | 95.6 | 0.2  |
| snengen       | 91.3 | 91.7 | -0.4 |
| snink         | 91.7 | 94.4 | -2.8 |
| snom          | 97.3 | 96.1 | 1.2  |
| snulten       | 93.2 | 95.2 | -2   |
| soddet        | 92   | 93.7 | -1.7 |
| sopimetief    | 93.1 | 90.4 | 2.7  |
| sorkeel       | 93.5 | 97   | -3.5 |
| soskerij      | 92.8 | 96.2 | -3.4 |
| spendetig     | 96   | 97.4 | -1.4 |
| spikiek       | 96.2 | 96.4 | -0.2 |
| spucot        | 96.2 | 96.9 | -0.7 |
| starm         | 94.5 | 95.2 | -0.7 |
| statienast    | 91.1 | 95.4 | -4.3 |
| statsen       | 93.7 | 92   | 1.7  |
| steik         | 91.6 | 94.2 | -2.7 |
| stezen        | 90.9 | 94.2 | -3.3 |
| stiefloen     | 92.8 | 97.2 | -4.4 |
| stobsato      | 96.6 | 97   | -0.4 |
| storf         | 91.4 | 90.2 | 1.2  |
| stougelin     | 94   | 96.4 | -2.4 |
| strarokie     | 96.8 | 95.9 | 0.9  |
| stritzent     | 97.1 | 97.4 | -0.3 |
| struifnever   | 91   | 91.9 | -0.9 |
| stumolen      | 90   | 91.3 | -1.3 |
| sturarte      | 93.9 | 96.4 | -2.5 |
| sturden       | 93.9 | 93.1 | 0.8  |

|                |      |      |      |
|----------------|------|------|------|
| suppijkt       | 95.3 | 97.1 | -1.7 |
| surisie        | 92.1 | 92.2 | -0.2 |
| sutting        | 94.4 | 94.5 | -0.1 |
| taben          | 91.9 | 94.9 | -3   |
| tandeteel      | 90.8 | 94.3 | -3.5 |
| taukelle       | 97.6 | 96.9 | 0.7  |
| tederie        | 93.4 | 92.8 | 0.7  |
| tegerpijds     | 97.4 | 97.4 | 0    |
| tegissant      | 92   | 93.3 | -1.3 |
| tekenitie      | 94.3 | 95.7 | -1.4 |
| teleniaan      | 90.1 | 92.7 | -2.6 |
| tendetorgie    | 90.2 | 94.8 | -4.5 |
| teper          | 91.7 | 92.4 | -0.6 |
| terasonaren    | 92.6 | 92   | 0.6  |
| tergendioneel  | 94.4 | 97   | -2.6 |
| terutator      | 90.4 | 90.8 | -0.4 |
| tesignegen     | 97.2 | 97.7 | -0.5 |
| tetaltive      | 97.1 | 97.9 | -0.8 |
| tezoper        | 96.1 | 97.3 | -1.1 |
| tigdering      | 96.3 | 97.7 | -1.3 |
| tistorie       | 92.2 | 93.1 | -0.9 |
| tivartie       | 93.5 | 93.3 | 0.2  |
| toedekaak      | 94   | 97.2 | -3.1 |
| toegons        | 94.4 | 96.2 | -1.7 |
| toevaping      | 97.6 | 97.5 | 0.1  |
| torlate        | 97.5 | 96.3 | 1.3  |
| tozinees       | 95.2 | 97   | -1.8 |
| tradidee       | 97.5 | 92.8 | 4.7  |
| traspontij     | 96.7 | 95.8 | 0.9  |
| trimalek       | 95.5 | 94.9 | 0.6  |
| troekens       | 93.2 | 96   | -2.9 |
| tromsiets      | 95.6 | 97.6 | -1.9 |
| tront          | 90.9 | 92.6 | -1.7 |
| twaads         | 94   | 95.9 | -1.9 |
| tyspude        | 96.6 | 97   | -0.4 |
| uigenoord      | 93.5 | 93   | 0.6  |
| uitgempen      | 90   | 93.5 | -3.5 |
| uithoktend     | 91.6 | 91.6 | 0    |
| uitmepoend     | 97.8 | 97.8 | 0    |
| uitsechost     | 97.2 | 97   | 0.2  |
| umpstijg       | 94.2 | 97.3 | -3.1 |
| vadenwinselijk | 97.1 | 96.6 | 0.5  |
| valetig        | 92.3 | 95.4 | -3.1 |
| varterel       | 96.4 | 96   | 0.4  |
| vebruchten     | 93   | 93.3 | -0.3 |
| veding         | 94   | 92.4 | 1.6  |
| vedraand       | 95.6 | 96.4 | -0.8 |
| veduksfurmer   | 97.4 | 97.6 | -0.2 |
| vefrarkeerd    | 96.4 | 95.1 | 1.3  |
| vegorgd        | 96.4 | 96.7 | -0.2 |
| vehegen        | 93.5 | 93.2 | 0.3  |
| vehoenlijk     | 91.9 | 94.7 | -2.9 |

|              |      |      |      |
|--------------|------|------|------|
| vejarist     | 92   | 94.8 | -2.8 |
| vekedial     | 97.1 | 97.6 | -0.5 |
| velaalkelijk | 96   | 97.7 | -1.7 |
| veleniteerd  | 95.4 | 96.2 | -0.8 |
| vemouw       | 97.3 | 97.8 | -0.5 |
| venedegen    | 93.1 | 95.7 | -2.6 |
| venijnten    | 92.6 | 94.4 | -1.8 |
| venunding    | 96.9 | 97.3 | -0.4 |
| vepekenen    | 93.5 | 96.9 | -3.4 |
| vepikkig     | 97.4 | 97.2 | 0.1  |
| verdsting    | 90.6 | 91.2 | -0.6 |
| veriede      | 91.8 | 92   | -0.1 |
| verieen      | 96.5 | 94.9 | 1.6  |
| vernoldaren  | 97.5 | 96.7 | 0.8  |
| verpijding   | 95   | 94.6 | 0.3  |
| verponpenen  | 95.3 | 96.4 | -1.1 |
| verscheeg    | 92.6 | 92   | 0.6  |
| versellen    | 91.8 | 93.4 | -1.6 |
| versuppen    | 94.3 | 97.6 | -3.3 |
| vertijstheid | 91.8 | 94   | -2.2 |
| verzieving   | 92.6 | 94.7 | -2.1 |
| vesolcineerd | 92.3 | 93.3 | -1   |
| vespoetening | 93.8 | 96   | -2.2 |
| vestesseling | 97.1 | 95.3 | 1.7  |
| vestraaiing  | 93   | 91.6 | 1.4  |
| vewilleloos  | 97.9 | 97.3 | 0.6  |
| vewiren      | 97.1 | 97.6 | -0.4 |
| vikoor       | 92   | 95.9 | -3.9 |
| vildaren     | 93.3 | 92.6 | 0.7  |
| vioron       | 95.4 | 94   | 1.4  |
| vlallen      | 96.5 | 97.1 | -0.6 |
| vlox         | 95.2 | 92.4 | 2.8  |
| vonlastisch  | 91.9 | 94.3 | -2.4 |
| vonoom       | 91.3 | 93.5 | -2.3 |
| vonve        | 97.5 | 97.1 | 0.4  |
| voorkleller  | 96.6 | 97.3 | -0.6 |
| vrietist     | 92.9 | 97   | -4.2 |
| vuiding      | 97.2 | 95.4 | 1.8  |
| vukpel       | 97.5 | 97.1 | 0.3  |
| wadiwer      | 97   | 97.1 | -0.1 |
| waflex       | 95.6 | 94.7 | 0.9  |
| wagerderisch | 96.9 | 97.9 | -0.9 |
| wahaliter    | 94.4 | 95   | -0.6 |
| walarminant  | 95.5 | 96.4 | -0.9 |
| wamegreren   | 97.8 | 97.4 | 0.4  |
| wanmecutie   | 93.8 | 95.6 | -1.8 |
| wanomeren    | 91.8 | 94   | -2.2 |
| warderlijk   | 92.7 | 95.5 | -2.8 |
| warenator    | 96.7 | 96.4 | 0.3  |
| warspelatie  | 95.6 | 95.3 | 0.3  |
| waspisitie   | 92.6 | 94.4 | -1.9 |
| wedigrafish  | 92.2 | 93   | -0.9 |

|                 |      |      |      |
|-----------------|------|------|------|
| weenschoppelijk | 94.5 | 97   | -2.4 |
| welprolen       | 94.8 | 97.6 | -2.8 |
| wemiak          | 95.4 | 97.5 | -2.2 |
| wenalia         | 93.2 | 97.8 | -4.6 |
| wenuratie       | 95.5 | 95   | 0.5  |
| wetterijn       | 91.2 | 90.7 | 0.5  |
| wijranig        | 95.4 | 96.7 | -1.4 |
| wilheur         | 91.7 | 95.7 | -4   |
| wilmgroei       | 92.7 | 93.7 | -1   |
| wistiek         | 92.7 | 95.4 | -2.7 |
| wrijmegen       | 96   | 97.8 | -1.8 |
| wuldauto        | 97.4 | 97.4 | 0    |
| zeben           | 96.8 | 95.2 | 1.7  |
| zem             | 93   | 95.5 | -2.5 |
| zergulatie      | 92   | 94.2 | -2.2 |
| zervens         | 97.9 | 97   | 0.9  |
| ziekelen        | 91.8 | 91.8 | -0.1 |
| zieuwerheid     | 96   | 95   | 1    |
| zieuwsbroef     | 97.1 | 97.2 | -0.1 |
| zimouwer        | 97.8 | 97   | 0.8  |
| zismiak         | 97.7 | 97.2 | 0.4  |
| zondalsbond     | 96.8 | 96   | 0.8  |
| zonserheid      | 96.2 | 97   | -0.8 |
| zoorn           | 93   | 95.4 | -2.5 |
| zopel           | 95.8 | 95.5 | 0.3  |
| zorditaseren    | 97.3 | 97.4 | -0.1 |
| zotenilisme     | 91.5 | 93.1 | -1.6 |
| zujucal         | 97.5 | 97.8 | -0.3 |
| zummer          | 96.4 | 96.3 | 0.1  |
| zwaldel         | 92.9 | 96   | -3.1 |
| zwemalaar       | 93.4 | 93   | 0.4  |
| zwidde          | 94.5 | 91.4 | 3.1  |
| zwockbar        | 97.2 | 97.3 | -0.1 |
| zwoost          | 94.6 | 95.5 | -0.8 |

Run 2: Words

| <b>Band</b> | <b>Word</b> | <b>Prevalence</b> | <b>Log Google Frequency</b> | <b>Difference Belgium/Netherlands</b> |
|-------------|-------------|-------------------|-----------------------------|---------------------------------------|
| 1           | schuilnaam  | 1.00              | 3.49                        | 0.0                                   |
| 1           | bijbel      | 1.00              | 4.32                        | 0.0                                   |
| 1           | kleding     | 1.00              | 4.38                        | 0.0                                   |
| 1           | schommelen  | 1.00              | 3.38                        | 0.0                                   |
| 1           | aankondigen | 1.00              | 3.39                        | 0.0                                   |
| 1           | tenzij      | 1.00              | 4.34                        | 0.0                                   |
| 1           | krimpen     | 1.00              | 3.71                        | 0.0                                   |
| 1           | papier      | 1.00              | 4.73                        | 0.0                                   |
| 1           | speciaal    | 1.00              | 4.58                        | 0.0                                   |
| 1           | loodgieter  | 1.00              | 3.33                        | 0.0                                   |
| 1           | opscheppen  | 1.00              | 3.33                        | 0.0                                   |
| 1           | uitdelen    | 1.00              | 3.47                        | 0.0                                   |

|   |              |      |      |      |
|---|--------------|------|------|------|
| 1 | oppervlakte  | 1.00 | 4.21 | 0.0  |
| 1 | droomwereld  | 1.00 | 3.41 | 0.0  |
| 1 | bar          | 1.00 | 4.33 | 0.0  |
| 1 | pensioen     | 1.00 | 4.09 | 0.0  |
| 1 | verbluffend  | 1.00 | 3.54 | 0.0  |
| 1 | maximaal     | 1.00 | 4.17 | 0.0  |
| 1 | bijgeloof    | 1.00 | 3.65 | 0.0  |
| 1 | matroos      | 1.00 | 3.72 | 0.0  |
| 2 | stoer        | 1.00 | 3.67 | 0.0  |
| 2 | bouwgrond    | 1.00 | 3.07 | 0.0  |
| 2 | notitieblok  | 1.00 | 3.39 | 0.0  |
| 2 | arm          | 1.00 | 4.74 | 0.0  |
| 2 | onschadelijk | 1.00 | 3.47 | 0.0  |
| 2 | contact      | 1.00 | 5.01 | 0.0  |
| 2 | knecht       | 1.00 | 3.97 | 0.0  |
| 2 | jongleren    | 1.00 | 3.34 | 0.0  |
| 2 | woordenschat | 1.00 | 3.65 | 0.0  |
| 2 | opwarmen     | 1.00 | 3.19 | 0.0  |
| 2 | postzegel    | 1.00 | 3.53 | 0.0  |
| 2 | pompoen      | 1.00 | 3.36 | 0.0  |
| 2 | ingang       | 1.00 | 4.43 | 0.0  |
| 2 | leerzaam     | 1.00 | 3.51 | 0.0  |
| 2 | beschaamd    | 1.00 | 3.73 | 0.0  |
| 2 | tegenstander | 1.00 | 4.02 | 0.0  |
| 2 | groeien      | 1.00 | 4.36 | 0.0  |
| 2 | fietspomp    | 1.00 | 2.73 | 0.0  |
| 2 | tijdroven    | 1.00 | 3.38 | 0.0  |
| 2 | feestelijk   | 1.00 | 3.75 | 0.0  |
| 3 | verzorgd     | 1.00 | 4.10 | 0.0  |
| 3 | trekken      | 1.00 | 4.85 | 0.0  |
| 3 | vraagteken   | 1.00 | 3.47 | -0.4 |
| 3 | lerares      | 1.00 | 3.65 | -0.4 |
| 3 | handbal      | 1.00 | 3.14 | 0.3  |
| 3 | kostbaar     | 1.00 | 3.82 | -0.4 |
| 3 | bladzijde    | 1.00 | 4.05 | -0.4 |
| 3 | onbepaald    | 1.00 | 3.60 | -0.5 |
| 3 | bouwjaar     | 1.00 | 3.31 | -0.4 |
| 3 | strak        | 1.00 | 4.29 | -0.4 |
| 3 | jezelf       | 1.00 | 4.43 | -0.4 |
| 3 | paranormaal  | 1.00 | 3.25 | -0.1 |
| 3 | ongunstig    | 1.00 | 3.63 | 0.0  |
| 3 | omzet        | 1.00 | 4.02 | 0.0  |
| 3 | tegenvaller  | 1.00 | 3.37 | -0.1 |
| 3 | typisch      | 1.00 | 4.34 | -0.4 |
| 3 | plechtigheid | 1.00 | 3.68 | -0.6 |
| 3 | automatisch  | 1.00 | 4.22 | -0.4 |
| 3 | dak          | 1.00 | 4.41 | -0.4 |
| 3 | gehoorzaam   | 1.00 | 3.60 | -0.4 |
| 4 | opbrengst    | 1.00 | 4.12 | -0.1 |
| 4 | ongeldig     | 1.00 | 3.26 | 0.3  |
| 4 | inspecteren  | 1.00 | 3.47 | -0.4 |
| 4 | aanvraag     | 1.00 | 4.01 | -0.4 |
| 4 | lopen        | 1.00 | 4.99 | -0.4 |

|   |               |      |      |      |
|---|---------------|------|------|------|
| 4 | speerwerpen   | 1.00 | 2.42 | 0.0  |
| 4 | opdracht      | 1.00 | 4.85 | 0.3  |
| 4 | paars         | 1.00 | 3.47 | 0.3  |
| 4 | aankijken     | 1.00 | 3.76 | -0.4 |
| 4 | plakboek      | 1.00 | 3.38 | -0.1 |
| 4 | krachtsport   | 1.00 | 3.31 | -0.1 |
| 4 | opgave        | 1.00 | 4.23 | -0.4 |
| 4 | gezinslid     | 1.00 | 3.29 | 0.3  |
| 4 | studio        | 1.00 | 4.22 | 0.0  |
| 4 | opzet         | 1.00 | 4.44 | -0.4 |
| 4 | vruchtensap   | 1.00 | 3.17 | 0.0  |
| 4 | nauwlettend   | 1.00 | 3.60 | -0.5 |
| 4 | redden        | 1.00 | 4.34 | 0.3  |
| 4 | verwennen     | 1.00 | 3.47 | -0.1 |
| 4 | hoofdkussen   | 1.00 | 3.38 | 0.0  |
| 5 | versleten     | 1.00 | 3.98 | -0.5 |
| 5 | vriendin      | 1.00 | 4.46 | -0.1 |
| 5 | humor         | 1.00 | 4.14 | -0.4 |
| 5 | geniaal       | 1.00 | 3.50 | 0.3  |
| 5 | machinist     | 1.00 | 3.50 | -0.1 |
| 5 | bubbelbad     | 1.00 | 3.07 | -0.1 |
| 5 | overhalen     | 1.00 | 3.66 | -0.4 |
| 5 | controleren   | 1.00 | 4.12 | -0.1 |
| 5 | hopen         | 1.00 | 4.27 | 0.3  |
| 5 | stout         | 1.00 | 3.71 | -0.5 |
| 5 | wenskaart     | 1.00 | 3.46 | -0.4 |
| 5 | tijdperk      | 1.00 | 4.18 | 0.3  |
| 5 | opslagplaats  | 1.00 | 3.29 | -0.4 |
| 5 | kunst         | 1.00 | 5.06 | -0.5 |
| 5 | woest         | 1.00 | 3.85 | -0.1 |
| 5 | behandeling   | 1.00 | 4.64 | -0.1 |
| 5 | zuiver        | 1.00 | 4.24 | 0.0  |
| 5 | uitgestrekt   | 1.00 | 3.71 | -0.5 |
| 5 | verjaardag    | 1.00 | 4.30 | -0.1 |
| 5 | koppeling     | 1.00 | 3.76 | -0.1 |
| 6 | herberg       | 1.00 | 3.91 | -0.1 |
| 6 | veldslag      | 1.00 | 3.63 | -0.1 |
| 6 | gratis        | 1.00 | 4.35 | -0.1 |
| 6 | schreeuwen    | 1.00 | 4.07 | -0.1 |
| 6 | aanleiding    | 1.00 | 4.81 | 0.0  |
| 6 | verdediger    | 1.00 | 3.61 | -0.4 |
| 6 | rennen        | 1.00 | 4.09 | -0.6 |
| 6 | tijdens       | 1.00 | 5.25 | -0.1 |
| 6 | zakenvrouw    | 1.00 | 3.37 | 0.0  |
| 6 | sterk         | 1.00 | 5.09 | -0.4 |
| 6 | spinazie      | 1.00 | 3.32 | -0.1 |
| 6 | schieten      | 1.00 | 4.29 | 0.3  |
| 6 | onleesbaar    | 1.00 | 3.69 | -0.4 |
| 6 | dichter       | 1.00 | 4.81 | 0.3  |
| 6 | smerig        | 1.00 | 3.65 | -0.5 |
| 6 | docent        | 1.00 | 4.16 | -0.4 |
| 6 | toepassing    | 1.00 | 4.66 | -0.8 |
| 6 | onafhankelijk | 1.00 | 4.25 | -0.1 |



|   |                   |      |      |      |
|---|-------------------|------|------|------|
| 6 | smakelijk         | 1.00 | 3.55 | 0.3  |
| 6 | chef              | 1.00 | 4.33 | 0.4  |
| 7 | gevolg            | 1.00 | 4.96 | -0.1 |
| 7 | videoband         | 1.00 | 2.94 | -0.4 |
| 7 | priester          | 1.00 | 4.26 | -0.6 |
| 7 | boomstam          | 1.00 | 3.53 | -0.2 |
| 7 | zolder            | 1.00 | 3.98 | 0.6  |
| 7 | besparing         | 1.00 | 3.37 | -0.1 |
| 7 | verpleegster      | 1.00 | 3.78 | -0.1 |
| 7 | internationaal    | 1.00 | 4.60 | 0.2  |
| 7 | waardebon         | 1.00 | 2.83 | -0.6 |
| 7 | aarzelend         | 1.00 | 3.95 | -0.2 |
| 7 | waaien            | 1.00 | 3.70 | 0.7  |
| 7 | geweldig          | 1.00 | 4.29 | 0.2  |
| 7 | deelnemer         | 1.00 | 3.65 | 0.0  |
| 7 | leider            | 1.00 | 4.36 | 0.3  |
| 7 | afdak             | 1.00 | 3.23 | 0.2  |
| 7 | roekeloos         | 1.00 | 3.63 | 0.2  |
| 7 | textiel           | 1.00 | 4.01 | -0.1 |
| 7 | aangenaam         | 1.00 | 4.11 | -0.1 |
| 7 | aanmelding        | 1.00 | 3.52 | 0.3  |
| 7 | scheur            | 1.00 | 3.57 | 0.2  |
| 8 | bescherming       | 1.00 | 4.51 | 0.6  |
| 8 | boterham          | 1.00 | 3.72 | 0.3  |
| 8 | mantel            | 1.00 | 4.12 | 0.6  |
| 8 | oogarts           | 1.00 | 3.32 | 0.6  |
| 8 | gevaarlijk        | 1.00 | 4.28 | -0.1 |
| 8 | voorschrift       | 1.00 | 3.64 | 0.6  |
| 8 | winter            | 1.00 | 4.67 | -0.4 |
| 8 | concentreren      | 1.00 | 4.06 | 0.3  |
| 8 | jager             | 1.00 | 4.06 | -0.2 |
| 8 | huurhuis          | 1.00 | 3.17 | -0.6 |
| 8 | versnelling       | 1.00 | 3.68 | 0.3  |
| 8 | weergeven         | 1.00 | 3.78 | 0.7  |
| 8 | nier              | 1.00 | 3.62 | -0.6 |
| 8 | negentig          | 1.00 | 4.36 | -0.3 |
| 8 | tak               | 1.00 | 4.23 | -0.2 |
| 8 | neerslag          | 1.00 | 3.84 | -0.1 |
| 8 | monument          | 1.00 | 4.21 | -0.5 |
| 8 | beginner          | 1.00 | 2.98 | -0.3 |
| 8 | boodschappenlijst | 1.00 | 3.04 | -0.1 |
| 8 | trots             | 1.00 | 4.52 | 0.2  |
| 9 | beproeving        | 1.00 | 3.73 | -0.2 |
| 9 | zichzelf          | 1.00 | 5.18 | -0.6 |
| 9 | omlopen           | 1.00 | 2.76 | -0.1 |
| 9 | brandweer         | 1.00 | 3.65 | 0.6  |
| 9 | reservering       | 1.00 | 3.23 | -0.1 |
| 9 | onbewoond         | 1.00 | 3.56 | 0.3  |
| 9 | middelmatig       | 1.00 | 3.43 | -0.6 |
| 9 | geslaagd          | 1.00 | 4.29 | -0.4 |
| 9 | uitzetten         | 1.00 | 3.50 | -0.6 |
| 9 | dronkenschap      | 1.00 | 3.59 | -0.1 |
| 9 | trouwens          | 1.00 | 4.71 | 0.3  |

|    |                   |      |      |      |
|----|-------------------|------|------|------|
| 9  | rekenen           | 1.00 | 4.44 | 0.2  |
| 9  | evenement         | 1.00 | 3.68 | -0.2 |
| 9  | begroting         | 1.00 | 3.99 | -0.5 |
| 9  | kast              | 1.00 | 4.29 | -0.5 |
| 9  | score             | 1.00 | 3.84 | 0.2  |
| 9  | lente             | 1.00 | 4.18 | -0.1 |
| 9  | technologie       | 1.00 | 4.23 | -0.2 |
| 9  | taalvaardig       | 1.00 | 3.00 | 0.3  |
| 9  | genoeg            | 1.00 | 5.14 | 0.3  |
| 10 | tweevoud          | 1.00 | 3.37 | -0.6 |
| 10 | ramp              | 1.00 | 4.10 | -0.2 |
| 10 | uitroeien         | 1.00 | 3.39 | 0.6  |
| 10 | buikdansen        | 1.00 | 2.66 | 0.7  |
| 10 | geneeskundig      | 1.00 | 3.48 | 0.3  |
| 10 | gewoonlijk        | 1.00 | 4.58 | -0.3 |
| 10 | dempen            | 1.00 | 3.39 | 0.2  |
| 10 | suikerspin        | 1.00 | 3.57 | 0.7  |
| 10 | constructie       | 1.00 | 4.30 | -0.2 |
| 10 | gunstig           | 1.00 | 4.21 | 0.2  |
| 10 | omkopen           | 1.00 | 3.19 | 0.2  |
| 10 | kooktijd          | 1.00 | 2.86 | -0.2 |
| 10 | aanbidden         | 1.00 | 3.41 | 0.6  |
| 10 | wielrenner        | 1.00 | 3.28 | -0.6 |
| 10 | lint              | 1.00 | 3.80 | 0.2  |
| 10 | code              | 1.00 | 4.47 | -0.1 |
| 10 | tuintafel         | 1.00 | 2.80 | -0.1 |
| 10 | voorzet           | 1.00 | 3.29 | -0.1 |
| 10 | danseres          | 1.00 | 3.57 | -0.1 |
| 10 | toerisme          | 1.00 | 3.86 | 0.2  |
| 11 | vakkundig         | 1.00 | 3.55 | -0.3 |
| 11 | landmijn          | 1.00 | 2.82 | 0.6  |
| 11 | tussenstand       | 1.00 | 3.25 | 0.1  |
| 11 | gezagvoerder      | 1.00 | 3.38 | 0.3  |
| 11 | stijgend          | 1.00 | 3.38 | -0.4 |
| 11 | dobbelsteen       | 1.00 | 3.18 | -0.2 |
| 11 | alarmbel          | 1.00 | 3.04 | -0.3 |
| 11 | ademhalen         | 1.00 | 3.71 | 0.3  |
| 11 | zeebodem          | 1.00 | 3.41 | -0.3 |
| 11 | brandnetel        | 1.00 | 3.17 | 0.7  |
| 11 | kin               | 1.00 | 4.19 | 0.6  |
| 11 | misselijk         | 1.00 | 3.82 | -0.6 |
| 11 | pudding           | 1.00 | 3.38 | 0.7  |
| 11 | roofdier          | 1.00 | 3.64 | 0.7  |
| 11 | bestuurbaar       | 1.00 | 3.00 | -0.2 |
| 11 | verleiden         | 1.00 | 3.88 | 0.3  |
| 11 | personeel         | 1.00 | 4.59 | -0.1 |
| 11 | maatschappelijk   | 1.00 | 4.50 | 0.2  |
| 11 | vriendschappelijk | 1.00 | 3.49 | -0.3 |
| 11 | stabiliteit       | 1.00 | 3.88 | -0.1 |
| 12 | bemachtigen       | 1.00 | 3.68 | 0.7  |
| 12 | plunderen         | 1.00 | 3.43 | 0.6  |
| 12 | eeuwig            | 1.00 | 4.21 | 0.2  |
| 12 | alcohol           | 1.00 | 4.02 | 0.2  |

|    |               |      |      |      |
|----|---------------|------|------|------|
| 12 | zondag        | 1.00 | 4.43 | 0.7  |
| 12 | wachten       | 1.00 | 4.92 | 0.7  |
| 12 | inhuren       | 1.00 | 3.23 | 0.5  |
| 12 | zeereis       | 1.00 | 3.57 | 0.1  |
| 12 | verwerven     | 1.00 | 4.21 | -0.6 |
| 12 | prachtig      | 1.00 | 4.47 | 0.7  |
| 12 | aanduiding    | 1.00 | 4.05 | 0.4  |
| 12 | ladder        | 1.00 | 3.83 | 0.6  |
| 12 | netvlies      | 1.00 | 3.48 | 0.5  |
| 12 | bijverdienen  | 1.00 | 3.08 | 0.2  |
| 12 | schrappen     | 1.00 | 3.67 | 0.2  |
| 12 | ringvinger    | 1.00 | 3.09 | 0.6  |
| 12 | theater       | 1.00 | 4.37 | 0.7  |
| 12 | logisch       | 1.00 | 4.19 | -0.1 |
| 12 | buikspier     | 1.00 | 2.32 | -0.6 |
| 12 | eikenhout     | 1.00 | 3.35 | 0.3  |
| 13 | keuken        | 1.00 | 4.64 | 0.6  |
| 13 | koolhydraat   | 1.00 | 2.85 | -0.4 |
| 13 | overtuigd     | 1.00 | 4.53 | 0.5  |
| 13 | eetgedrag     | 1.00 | 3.12 | 0.2  |
| 13 | warmlopen     | 1.00 | 2.64 | -0.8 |
| 13 | doelwit       | 1.00 | 3.81 | 0.2  |
| 13 | bevestigen    | 1.00 | 4.06 | -0.3 |
| 13 | flexibiliteit | 1.00 | 3.82 | 0.0  |
| 13 | denkwijze     | 1.00 | 3.41 | 0.5  |
| 13 | idealist      | 1.00 | 3.45 | 0.6  |
| 13 | soldaat       | 1.00 | 4.20 | 0.6  |
| 13 | ingevoegd     | 1.00 | 3.49 | -0.2 |
| 13 | charmeur      | 1.00 | 3.56 | 0.5  |
| 13 | morgenavond   | 1.00 | 3.35 | -0.1 |
| 13 | achteraan     | 1.00 | 3.83 | 0.6  |
| 13 | optimisme     | 1.00 | 3.80 | -0.2 |
| 13 | balans        | 1.00 | 4.62 | 0.3  |
| 13 | karton        | 1.00 | 3.87 | -0.1 |
| 13 | peer          | 1.00 | 3.70 | 0.5  |
| 13 | kamerdeur     | 1.00 | 3.29 | 0.5  |
| 14 | gemeenschap   | 1.00 | 4.66 | 0.8  |
| 14 | interactief   | 1.00 | 3.51 | 0.2  |
| 14 | bijhouden     | 1.00 | 3.64 | 0.5  |
| 14 | verwisselen   | 1.00 | 3.37 | -0.1 |
| 14 | reageren      | 0.99 | 4.26 | 1.0  |
| 14 | kookpot       | 0.99 | 3.18 | 0.7  |
| 14 | overdonderen  | 0.99 | 3.03 | 0.0  |
| 14 | keelholte     | 0.99 | 2.56 | 0.6  |
| 14 | figureren     | 0.99 | 3.50 | 0.0  |
| 14 | openbaren     | 0.99 | 3.62 | 0.5  |
| 14 | meetbaar      | 0.99 | 3.31 | -0.2 |
| 14 | twintig       | 0.99 | 4.83 | 0.3  |
| 14 | landing       | 0.99 | 3.65 | 0.5  |
| 14 | dadelijk      | 0.99 | 4.08 | 0.6  |
| 14 | aanmaak       | 0.99 | 3.20 | 0.6  |
| 14 | overgaan      | 0.99 | 3.96 | -0.8 |
| 14 | gericht       | 0.99 | 4.84 | -0.2 |

|    |                 |      |      |      |
|----|-----------------|------|------|------|
| 14 | vastzitten      | 0.99 | 3.39 | 0.5  |
| 14 | camera          | 0.99 | 4.21 | -0.1 |
| 14 | wolf            | 0.99 | 4.21 | 0.2  |
| 15 | voorwaarde      | 0.99 | 4.34 | -0.2 |
| 15 | wasmiddel       | 0.99 | 3.17 | 0.5  |
| 15 | dobberen        | 0.99 | 3.31 | -0.6 |
| 15 | glinsteren      | 0.99 | 3.37 | -0.1 |
| 15 | frustreren      | 0.99 | 3.16 | -0.4 |
| 15 | minpunt         | 0.99 | 3.23 | 0.0  |
| 15 | bespreekbaar    | 0.99 | 3.48 | 0.7  |
| 15 | onaantrekkelijk | 0.99 | 3.41 | 0.6  |
| 15 | doek            | 0.99 | 4.39 | 0.7  |
| 15 | onderhoudend    | 0.99 | 4.30 | -0.1 |
| 15 | razend          | 0.99 | 3.86 | 0.3  |
| 15 | historie        | 0.99 | 4.46 | 0.6  |
| 15 | delicatesse     | 0.99 | 3.23 | -0.4 |
| 15 | begrafenis      | 0.99 | 4.11 | 0.2  |
| 15 | welvarend       | 0.99 | 3.44 | -0.6 |
| 15 | vechtpartij     | 0.99 | 3.50 | 0.6  |
| 15 | anorexia        | 0.99 | 3.36 | 1.0  |
| 15 | excellentie     | 0.99 | 3.64 | -0.5 |
| 15 | verrassing      | 0.99 | 4.17 | -0.3 |
| 15 | linkerkant      | 0.99 | 3.58 | 0.6  |
| 16 | laklaag         | 0.99 | 2.54 | -0.4 |
| 16 | snijdend        | 0.99 | 3.31 | 0.0  |
| 16 | videocamera     | 0.99 | 3.20 | -0.3 |
| 16 | lat             | 0.99 | 3.98 | 0.1  |
| 16 | routine         | 0.99 | 3.71 | 0.4  |
| 16 | crematie        | 0.99 | 3.43 | 0.0  |
| 16 | sponsor         | 0.99 | 3.33 | -0.8 |
| 16 | treiteren       | 0.99 | 3.39 | 0.2  |
| 16 | verbaasd        | 0.99 | 4.40 | 0.3  |
| 16 | oorsmeer        | 0.99 | 2.77 | 0.5  |
| 16 | spion           | 0.99 | 3.70 | 1.0  |
| 16 | kerkstoel       | 0.99 | 2.23 | 0.5  |
| 16 | schouw          | 0.99 | 3.66 | 0.2  |
| 16 | leestempo       | 0.99 | 3.20 | 0.0  |
| 16 | minder          | 0.99 | 5.21 | 0.6  |
| 16 | zeemansgraf     | 0.99 | 3.45 | 0.0  |
| 16 | pashok          | 0.99 | 2.11 | 0.7  |
| 16 | admiraal        | 0.99 | 3.97 | -0.2 |
| 16 | percentage      | 0.99 | 4.32 | 0.5  |
| 16 | doorstrepen     | 0.99 | 2.83 | -0.6 |
| 17 | eigenbelang     | 0.99 | 3.69 | 0.0  |
| 17 | hok             | 0.99 | 3.75 | 0.8  |
| 17 | rotten          | 0.99 | 3.49 | 0.1  |
| 17 | nijdig          | 0.99 | 3.65 | 0.4  |
| 17 | asiel           | 0.99 | 3.58 | 0.4  |
| 17 | kabeljauw       | 0.99 | 3.23 | 0.6  |
| 17 | tijger          | 0.99 | 3.73 | 0.9  |
| 17 | grot            | 0.99 | 3.84 | 0.5  |
| 17 | versterking     | 0.99 | 4.07 | 0.8  |
| 17 | bijstellen      | 0.99 | 3.34 | 0.2  |

|    |                 |      |      |      |
|----|-----------------|------|------|------|
| 17 | gestreept       | 0.99 | 3.40 | 0.5  |
| 17 | detecteren      | 0.99 | 3.13 | 0.0  |
| 17 | wapperen        | 0.99 | 3.48 | -0.4 |
| 17 | optrommelen     | 0.99 | 2.66 | -0.8 |
| 17 | voogdij         | 0.99 | 3.60 | -1.1 |
| 17 | slok            | 0.99 | 3.96 | 0.5  |
| 17 | refrein         | 0.99 | 3.58 | 0.0  |
| 17 | supporter       | 0.99 | 3.33 | 0.5  |
| 17 | markering       | 0.99 | 3.30 | 0.0  |
| 17 | stedeling       | 0.99 | 3.32 | -0.6 |
| 18 | sjaal           | 0.99 | 3.73 | 0.2  |
| 18 | ontstaan        | 0.99 | 4.94 | 0.4  |
| 18 | makkelijk       | 0.99 | 4.41 | -0.7 |
| 18 | moleculair      | 0.99 | 3.27 | -0.7 |
| 18 | meloen          | 0.99 | 3.24 | 1.1  |
| 18 | verschijning    | 0.99 | 4.18 | -0.1 |
| 18 | regime          | 0.99 | 4.29 | -0.2 |
| 18 | koolraap        | 0.99 | 2.84 | -0.2 |
| 18 | slenteren       | 0.99 | 3.50 | 0.4  |
| 18 | vaststelling    | 0.99 | 4.10 | 0.8  |
| 18 | onthalen        | 0.99 | 2.98 | -0.6 |
| 18 | volleybal       | 0.99 | 3.13 | -0.7 |
| 18 | bewerkstelligen | 0.99 | 3.86 | -0.5 |
| 18 | ontzag          | 0.99 | 3.81 | 0.1  |
| 18 | herhaaldelijk   | 0.99 | 4.17 | -0.1 |
| 18 | ijsvrij         | 0.99 | 3.16 | -0.7 |
| 18 | afstempelen     | 0.99 | 2.53 | 0.2  |
| 18 | belagen         | 0.99 | 3.17 | -0.7 |
| 18 | zuidwaarts      | 0.99 | 3.45 | -0.8 |
| 18 | ondeelbaar      | 0.99 | 3.35 | 0.0  |
| 19 | menslievend     | 0.99 | 2.72 | -0.5 |
| 19 | muf             | 0.99 | 3.32 | -0.1 |
| 19 | mailen          | 0.99 | 3.48 | 0.9  |
| 19 | principiëel     | 0.99 | 3.84 | 0.2  |
| 19 | omploegen       | 0.99 | 2.66 | -0.3 |
| 19 | opvliegend      | 0.99 | 3.29 | 1.3  |
| 19 | stopzetten      | 0.99 | 3.36 | 1.2  |
| 19 | fascineren      | 0.99 | 3.45 | 0.2  |
| 19 | misvormd        | 0.99 | 3.32 | 0.6  |
| 19 | doortocht       | 0.99 | 3.52 | 0.8  |
| 19 | microchip       | 0.99 | 2.83 | -0.5 |
| 19 | analfabetisme   | 0.99 | 3.26 | -1.0 |
| 19 | statistisch     | 0.99 | 4.26 | -0.6 |
| 19 | levenslustig    | 0.99 | 3.40 | -0.1 |
| 19 | alvleesklier    | 0.99 | 2.98 | -1.4 |
| 19 | nomineren       | 0.99 | 3.32 | -0.7 |
| 19 | verschroeien    | 0.99 | 2.74 | 0.0  |
| 19 | trol            | 0.99 | 3.52 | 0.1  |
| 19 | borstkas        | 0.99 | 3.62 | 0.8  |
| 19 | vertering       | 0.99 | 3.01 | 1.0  |
| 20 | aanstormen      | 0.99 | 2.73 | -1.0 |
| 20 | flauwvallen     | 0.99 | 3.17 | 0.3  |
| 20 | sabotage        | 0.99 | 3.61 | 0.6  |

|    |                 |      |      |      |
|----|-----------------|------|------|------|
| 20 | naaldbos        | 0.99 | 2.72 | 0.5  |
| 20 | weliswaar       | 0.99 | 4.74 | -0.5 |
| 20 | krantenkop      | 0.99 | 3.01 | -0.6 |
| 20 | wapentuig       | 0.99 | 3.27 | 0.0  |
| 20 | eliminatie      | 0.99 | 3.19 | 0.4  |
| 20 | korset          | 0.99 | 3.21 | 1.2  |
| 20 | implantaat      | 0.99 | 2.79 | -0.2 |
| 20 | lafaard         | 0.99 | 3.54 | -1.1 |
| 20 | opborrelen      | 0.99 | 3.24 | -1.1 |
| 20 | zeedijk         | 0.99 | 3.44 | -0.9 |
| 20 | stoomwolk       | 0.99 | 2.06 | -1.7 |
| 20 | karakteriseren  | 0.99 | 3.52 | 1.1  |
| 20 | wijnoogst       | 0.99 | 2.75 | -1.4 |
| 20 | begeerd         | 0.99 | 3.58 | -0.7 |
| 20 | uitbrengen      | 0.99 | 3.84 | 1.7  |
| 20 | lichtschakelaar | 0.99 | 2.61 | 0.7  |
| 20 | stempeldoos     | 0.99 | 1.85 | 0.4  |
| 21 | autisme         | 0.99 | 3.29 | 0.1  |
| 21 | reiniger        | 0.99 | 2.69 | 0.4  |
| 21 | getintel        | 0.99 | 1.93 | 0.8  |
| 21 | administratief  | 0.99 | 3.96 | 1.5  |
| 21 | abstractie      | 0.99 | 3.60 | 0.4  |
| 21 | rijverbod       | 0.99 | 2.42 | 1.8  |
| 21 | vaartijd        | 0.99 | 2.26 | 0.9  |
| 21 | driedelig       | 0.99 | 3.52 | -0.5 |
| 21 | gedisciplineerd | 0.99 | 3.34 | 1.6  |
| 21 | binnenstebuiten | 0.99 | 3.56 | -1.7 |
| 21 | recensie        | 0.99 | 4.02 | 0.1  |
| 21 | reactor         | 0.99 | 3.38 | 1.0  |
| 21 | terugkrijgen    | 0.99 | 3.39 | 0.3  |
| 21 | aantrekking     | 0.99 | 3.24 | -0.1 |
| 21 | poppenwagen     | 0.99 | 2.85 | 1.0  |
| 21 | vlekkeloos      | 0.99 | 3.48 | 1.1  |
| 21 | koudbloedig     | 0.99 | 2.55 | -0.5 |
| 21 | filiaal         | 0.99 | 3.58 | 0.1  |
| 21 | zeevogel        | 0.99 | 2.61 | 0.5  |
| 21 | gesmeek         | 0.99 | 2.07 | -0.4 |
| 22 | daarheen        | 0.99 | 3.73 | 0.2  |
| 22 | hagelen         | 0.99 | 2.72 | -1.4 |
| 22 | prinses         | 0.99 | 4.30 | 1.1  |
| 22 | westelijk       | 0.99 | 3.85 | 1.3  |
| 22 | presidentieel   | 0.99 | 3.08 | 1.7  |
| 22 | debatteren      | 0.99 | 3.37 | -1.0 |
| 22 | alleseter       | 0.99 | 3.42 | -0.6 |
| 22 | afzweren        | 0.99 | 3.09 | 0.3  |
| 22 | eentalig        | 0.99 | 2.88 | 0.2  |
| 22 | hoofdtal        | 0.99 | 2.32 | -0.8 |
| 22 | dessert         | 0.99 | 3.46 | 2.0  |
| 22 | pathetisch      | 0.99 | 3.49 | -1.0 |
| 22 | bestijgen       | 0.99 | 3.33 | -0.8 |
| 22 | weglokken       | 0.99 | 2.25 | 0.9  |
| 22 | kippenvlees     | 0.99 | 2.70 | 1.2  |
| 22 | schoolbal       | 0.99 | 2.85 | 1.3  |

|    |                |      |      |      |
|----|----------------|------|------|------|
| 22 | verbouwer      | 0.99 | 2.23 | 0.4  |
| 22 | handenarbeid   | 0.99 | 3.36 | -0.7 |
| 22 | opgeleide      | 0.99 | 3.67 | 0.4  |
| 22 | abonnement     | 0.99 | 3.93 | 0.4  |
| 23 | aluminiumfolie | 0.98 | 3.31 | 0.8  |
| 23 | vastlijmen     | 0.98 | 2.31 | 0.1  |
| 23 | lawaaierig     | 0.98 | 3.03 | 1.2  |
| 23 | staand         | 0.98 | 3.76 | 0.0  |
| 23 | opfokken       | 0.98 | 2.66 | 0.1  |
| 23 | voorafgaan     | 0.98 | 3.41 | 0.0  |
| 23 | schimmig       | 0.98 | 3.40 | -1.8 |
| 23 | butler         | 0.98 | 3.81 | 0.4  |
| 23 | epicentrum     | 0.98 | 3.48 | 0.0  |
| 23 | orthodoxe      | 0.98 | 3.84 | -1.5 |
| 23 | teugel         | 0.98 | 3.35 | -0.7 |
| 23 | rouwdag        | 0.98 | 1.97 | 1.1  |
| 23 | onvoldaan      | 0.98 | 2.96 | 0.7  |
| 23 | openhouden     | 0.98 | 3.27 | 1.4  |
| 23 | tennisser      | 0.98 | 3.18 | -0.9 |
| 23 | confetti       | 0.98 | 3.42 | 1.0  |
| 23 | marsepein      | 0.98 | 3.50 | 0.2  |
| 23 | geknik         | 0.98 | 2.53 | -1.7 |
| 23 | biljet         | 0.98 | 3.43 | 1.1  |
| 23 | onderbewust    | 0.98 | 2.87 | 0.0  |
| 24 | zwartmaken     | 0.98 | 2.53 | -0.3 |
| 24 | afzienbaar     | 0.98 | 0.95 | 0.4  |
| 24 | ontgoochelen   | 0.98 | 2.58 | 1.4  |
| 24 | uitlokking     | 0.98 | 2.71 | 0.8  |
| 24 | hyena          | 0.98 | 3.42 | -1.5 |
| 24 | verdrukken     | 0.98 | 2.51 | 0.7  |
| 24 | wrakstuk       | 0.98 | 2.15 | -0.6 |
| 24 | wegdenken      | 0.98 | 2.92 | -1.0 |
| 24 | doodgaan       | 0.98 | 3.74 | 0.2  |
| 24 | afwerpen       | 0.98 | 3.28 | -2.2 |
| 24 | monopolie      | 0.98 | 3.71 | -0.4 |
| 24 | gewichtheffer  | 0.98 | 2.87 | 0.0  |
| 24 | bevliegen      | 0.98 | 1.65 | -1.1 |
| 24 | stroperij      | 0.98 | 2.63 | -2.0 |
| 24 | cardiogram     | 0.98 | 2.25 | -2.1 |
| 24 | ongenoemd      | 0.98 | 3.28 | -0.9 |
| 24 | zoekwerk       | 0.98 | 3.16 | -0.7 |
| 24 | daartussen     | 0.98 | 3.75 | 1.5  |
| 24 | opwellen       | 0.98 | 3.20 | -1.9 |
| 24 | toedragen      | 0.98 | 3.23 | -1.4 |
| 25 | geflits        | 0.98 | 2.51 | -2.2 |
| 25 | schel          | 0.98 | 3.54 | -0.6 |
| 25 | finaal         | 0.98 | 3.42 | 1.4  |
| 25 | taalschrift    | 0.98 | 2.84 | -0.8 |
| 25 | ongeneeslijk   | 0.98 | 3.55 | 0.2  |
| 25 | gespartel      | 0.98 | 2.50 | 1.3  |
| 25 | armgebaar      | 0.98 | 2.72 | -1.0 |
| 25 | toewuiven      | 0.98 | 2.09 | 0.3  |
| 25 | verleren       | 0.98 | 2.99 | -1.0 |

|    |                |      |      |      |
|----|----------------|------|------|------|
| 25 | onbebouwd      | 0.98 | 2.87 | 0.5  |
| 25 | gejodel        | 0.98 | 2.05 | -0.2 |
| 25 | optelling      | 0.98 | 2.97 | 2.1  |
| 25 | whisky         | 0.98 | 3.29 | -1.4 |
| 25 | bibliothecaris | 0.98 | 3.70 | -0.9 |
| 25 | ondertand      | 0.98 | 1.00 | -1.7 |
| 25 | prothese       | 0.98 | 3.19 | 0.6  |
| 25 | bestelen       | 0.98 | 3.15 | -0.1 |
| 25 | imitatie       | 0.98 | 3.63 | 1.4  |
| 25 | omdoen         | 0.98 | 2.99 | 0.1  |
| 25 | babysitten     | 0.98 | 3.15 | 1.6  |
| 26 | jazzdans       | 0.98 | 2.44 | -1.1 |
| 26 | nabloei        | 0.98 | 3.15 | -0.1 |
| 26 | pizzeria       | 0.98 | 3.30 | 2.8  |
| 26 | kernzin        | 0.98 | 3.04 | 0.9  |
| 26 | elektrocuteren | 0.98 | 2.35 | -2.3 |
| 26 | smeedbaar      | 0.98 | 1.79 | -0.7 |
| 26 | weerkunde      | 0.98 | 3.18 | 1.3  |
| 26 | parabool       | 0.98 | 3.05 | 1.8  |
| 26 | trilogie       | 0.98 | 3.82 | 2.2  |
| 26 | betweter       | 0.98 | 3.24 | 1.2  |
| 26 | zeilpak        | 0.98 | 1.64 | -0.9 |
| 26 | afschuren      | 0.98 | 2.06 | 1.6  |
| 26 | verkwikken     | 0.97 | 2.68 | -2.7 |
| 26 | tofu           | 0.97 | 3.14 | 0.4  |
| 26 | omkering       | 0.97 | 3.60 | 1.2  |
| 26 | regulatie      | 0.97 | 2.97 | -2.0 |
| 26 | aanmoedigend   | 0.97 | 2.98 | 2.1  |
| 26 | dienstvaardig  | 0.97 | 2.56 | -0.1 |
| 26 | sacrament      | 0.97 | 3.72 | 2.3  |
| 26 | gebloemd       | 0.97 | 2.94 | -1.5 |
| 27 | prutserig      | 0.97 | 0.95 | -1.6 |
| 27 | ongevormd      | 0.97 | 2.44 | -1.2 |
| 27 | overdekken     | 0.97 | 2.68 | 3.0  |
| 27 | rijspoor       | 0.97 | 0.30 | 1.0  |
| 27 | opklappen      | 0.97 | 1.74 | -2.0 |
| 27 | rangtelwoord   | 0.97 | 2.21 | -0.2 |
| 27 | karamel        | 0.97 | 3.24 | 0.6  |
| 27 | wijden         | 0.97 | 3.94 | -0.9 |
| 27 | optrek         | 0.97 | 2.73 | 1.9  |
| 27 | trekroute      | 0.97 | 2.27 | 1.3  |
| 27 | neigen         | 0.97 | 3.34 | -1.8 |
| 27 | vredespada     | 0.97 | 0.95 | -1.9 |
| 27 | ontzegeld      | 0.97 | 2.62 | -2.7 |
| 27 | symmetrie      | 0.97 | 3.46 | 1.2  |
| 27 | katrol         | 0.97 | 2.79 | -1.8 |
| 27 | geloofte       | 0.97 | 3.42 | -0.6 |
| 27 | koningschap    | 0.97 | 3.65 | -2.3 |
| 27 | ijzeren        | 0.97 | 4.26 | -0.2 |
| 27 | skireis        | 0.97 | 0.90 | 1.0  |
| 27 | wier           | 0.97 | 4.27 | -1.2 |
| 28 | toehoren       | 0.97 | 2.34 | -3.4 |
| 28 | eikenboom      | 0.97 | 3.25 | -3.8 |



|    |                |      |      |      |
|----|----------------|------|------|------|
| 28 | vechthaan      | 0.97 | 3.47 | 2.0  |
| 28 | groothartig    | 0.97 | 2.28 | 1.1  |
| 28 | fietsrit       | 0.97 | 2.08 | 2.4  |
| 28 | godsleer       | 0.97 | 2.86 | -2.0 |
| 28 | alchemie       | 0.97 | 3.49 | -3.2 |
| 28 | milligram      | 0.97 | 2.76 | 1.6  |
| 28 | druppen        | 0.97 | 3.03 | -3.8 |
| 28 | homogeniteit   | 0.97 | 3.30 | 0.3  |
| 28 | burgemeester   | 0.97 | 4.49 | 2.7  |
| 28 | stookhout      | 0.97 | 2.05 | -3.7 |
| 28 | onderrichten   | 0.97 | 3.13 | 2.8  |
| 28 | huurbasis      | 0.97 | 1.89 | 0.4  |
| 28 | kreuk          | 0.96 | 3.42 | 0.4  |
| 28 | afgrijzen      | 0.96 | 3.63 | -3.4 |
| 28 | verbluft       | 0.96 | 3.57 | 2.2  |
| 28 | klimnet        | 0.96 | 1.00 | 0.4  |
| 28 | copiloot       | 0.96 | 2.72 | -0.1 |
| 28 | bovenhalen     | 0.96 | 2.93 | 3.3  |
| 29 | schouwing      | 0.96 | 3.00 | 0.6  |
| 29 | wetteloos      | 0.96 | 2.93 | -3.2 |
| 29 | omblazen       | 0.96 | 1.26 | -1.2 |
| 29 | ruggenwervel   | 0.96 | 2.29 | -3.1 |
| 29 | opzicht        | 0.96 | 4.52 | 3.6  |
| 29 | ereplicht      | 0.96 | 2.68 | -3.3 |
| 29 | dijkweg        | 0.96 | 2.48 | 0.1  |
| 29 | grindpad       | 0.96 | 3.01 | -1.7 |
| 29 | incalculeren   | 0.96 | 2.49 | 4.3  |
| 29 | opdroging      | 0.96 | 1.72 | -3.4 |
| 29 | goedgehumeurd  | 0.96 | 2.81 | -2.9 |
| 29 | kerkraad       | 0.96 | 2.38 | 3.5  |
| 29 | rechtszaak     | 0.96 | 3.67 | -0.3 |
| 29 | nevenschikking | 0.96 | 3.12 | 1.2  |
| 29 | asymmetrisch   | 0.96 | 3.13 | 1.6  |
| 29 | toonval        | 0.96 | 2.27 | -2.8 |
| 29 | nazomers       | 0.96 | 1.89 | -2.6 |
| 29 | inpraten       | 0.96 | 2.66 | 2.0  |
| 29 | observant      | 0.96 | 3.36 | -3.8 |
| 29 | hernieuwen     | 0.96 | 3.07 | 2.2  |
| 30 | vuurhaard      | 0.96 | 2.59 | -2.0 |
| 30 | corporatie     | 0.96 | 3.18 | -1.5 |
| 30 | astmatisch     | 0.96 | 2.59 | -1.9 |
| 30 | afremming      | 0.96 | 2.35 | 1.9  |
| 30 | immens         | 0.96 | 3.61 | 1.9  |
| 30 | balseming      | 0.96 | 2.54 | -2.8 |
| 30 | rationalisme   | 0.96 | 3.45 | 2.8  |
| 30 | afdwaling      | 0.96 | 2.47 | -0.8 |
| 30 | aangapen       | 0.95 | 2.50 | -4.2 |
| 30 | pubertijd      | 0.95 | 3.18 | 1.4  |
| 30 | sportieveling  | 0.95 | 2.49 | 3.5  |
| 30 | uitboren       | 0.95 | 1.83 | 1.6  |
| 30 | heidendom      | 0.95 | 3.40 | 1.5  |
| 30 | kleinhartig    | 0.95 | 0.85 | 0.8  |
| 30 | onaanmemelijk  | 0.95 | 3.18 | 1.3  |

|    |              |      |      |      |
|----|--------------|------|------|------|
| 30 | busstop      | 0.95 | 1.95 | 2.1  |
| 30 | openlaten    | 0.95 | 2.74 | -0.2 |
| 30 | terugkopen   | 0.95 | 2.59 | 0.4  |
| 30 | apporteren   | 0.95 | 3.23 | -2.8 |
| 30 | spiercel     | 0.95 | 2.00 | 2.1  |
| 31 | notatie      | 0.95 | 3.17 | -3.0 |
| 31 | radicaliteit | 0.95 | 3.24 | 2.1  |
| 31 | bijslag      | 0.95 | 2.20 | 1.0  |
| 31 | vlakker      | 0.95 | 2.94 | -1.1 |
| 31 | warmhartig   | 0.95 | 2.55 | 3.4  |
| 31 | aankleven    | 0.95 | 2.95 | 2.6  |
| 31 | uitvragen    | 0.95 | 2.43 | 4.0  |
| 31 | piranha      | 0.95 | 3.41 | -2.7 |
| 31 | omhulling    | 0.95 | 2.92 | -1.9 |
| 31 | dienstig     | 0.95 | 3.42 | -0.4 |
| 31 | hartstikke   | 0.95 | 3.66 | -0.9 |
| 31 | assenstelsel | 0.95 | 2.56 | 0.5  |
| 31 | eromheen     | 0.95 | 3.84 | 0.8  |
| 31 | onvertakt    | 0.95 | 1.94 | 3.8  |
| 31 | suspensie    | 0.95 | 2.69 | 3.3  |
| 31 | gedachtegang | 0.95 | 3.56 | -1.6 |
| 31 | ervandoor    | 0.95 | 3.79 | 2.0  |
| 31 | ploegarts    | 0.94 | 1.90 | 4.0  |
| 31 | draaidag     | 0.94 | 2.53 | 4.5  |
| 31 | evengoed     | 0.94 | 3.90 | -3.0 |
| 32 | aggregatie   | 0.94 | 2.87 | 4.0  |
| 32 | omwerpen     | 0.94 | 1.96 | 0.0  |
| 32 | punctuur     | 0.94 | 1.80 | 0.5  |
| 32 | voorlaten    | 0.94 | 0.95 | 2.4  |
| 32 | bekoeling    | 0.94 | 2.20 | -3.9 |
| 32 | persistentie | 0.94 | 2.71 | -1.5 |
| 32 | peilloos     | 0.94 | 3.08 | -2.3 |
| 32 | ongeleerd    | 0.94 | 2.29 | 2.8  |
| 32 | bijzaal      | 0.94 | 0.78 | -0.6 |
| 32 | hatelijkheid | 0.94 | 2.67 | -1.8 |
| 32 | hoogstnodig  | 0.94 | 2.12 | 2.2  |
| 32 | afladen      | 0.94 | 2.19 | -0.3 |
| 32 | hardmaken    | 0.94 | 1.40 | -1.8 |
| 32 | kangoeroe    | 0.94 | 3.59 | 4.9  |
| 32 | boeddhist    | 0.94 | 3.23 | -0.5 |
| 32 | uitdenken    | 0.94 | 3.08 | -1.4 |
| 32 | drukplek     | 0.94 | 0.00 | -4.5 |
| 32 | hydrofoob    | 0.94 | 2.09 | 1.4  |
| 32 | betuttelaar  | 0.93 | 0.70 | -0.6 |
| 32 | urdiens      | 0.93 | 1.00 | -6.8 |
| 33 | induiken     | 0.93 | 3.08 | -1.3 |
| 33 | opkrullen    | 0.93 | 2.58 | 3.7  |
| 33 | bebossen     | 0.93 | 2.41 | 3.2  |
| 33 | inneming     | 0.93 | 2.88 | -2.7 |
| 33 | glorievol    | 0.93 | 1.96 | -0.3 |
| 33 | detineren    | 0.93 | 1.97 | -4.2 |
| 33 | omkantelen   | 0.93 | 1.81 | 6.5  |
| 33 | hiervandaan  | 0.93 | 3.49 | 0.7  |

|    |                 |      |      |      |
|----|-----------------|------|------|------|
| 33 | meedogend       | 0.93 | 2.63 | -2.0 |
| 33 | onbeschrijflijk | 0.93 | 3.33 | 0.5  |
| 33 | overlever       | 0.93 | 3.65 | 0.1  |
| 33 | ongelijnd       | 0.93 | 0.85 | -4.6 |
| 33 | neerknielen     | 0.93 | 2.61 | 3.8  |
| 33 | lijfknecht      | 0.93 | 2.32 | 0.2  |
| 33 | delinquentie    | 0.93 | 2.80 | 6.1  |
| 33 | voeteinde       | 0.93 | 2.14 | 7.0  |
| 33 | diabeticus      | 0.93 | 2.39 | 6.3  |
| 33 | verlating       | 0.93 | 3.43 | -1.9 |
| 33 | korstig         | 0.93 | 2.18 | 0.7  |
| 33 | afzadelen       | 0.93 | 1.85 | -3.2 |
| 34 | heenbrengen     | 0.92 | 1.75 | -2.4 |
| 34 | naartoe         | 0.92 | 4.31 | 4.7  |
| 34 | manoeuvreren    | 0.92 | 3.44 | 2.7  |
| 34 | empirisme       | 0.92 | 3.18 | 0.8  |
| 34 | afstormen       | 0.92 | 2.60 | -4.3 |
| 34 | voorlicht       | 0.92 | 2.46 | 3.6  |
| 34 | geleedpotige    | 0.92 | 2.16 | 1.3  |
| 34 | psychoot        | 0.92 | 2.81 | 3.9  |
| 34 | gestipt         | 0.92 | 2.16 | 3.5  |
| 34 | zonnewering     | 0.92 | 2.45 | 6.2  |
| 34 | rasdier         | 0.92 | 0.78 | 4.2  |
| 34 | opberging       | 0.92 | 2.30 | 5.4  |
| 34 | rodekool        | 0.92 | 2.76 | -3.1 |
| 34 | sluimerig       | 0.92 | 0.78 | -1.8 |
| 34 | tsjirpen        | 0.92 | 3.18 | 3.4  |
| 34 | knaagtand       | 0.91 | 1.00 | -0.6 |
| 34 | ingewand        | 0.91 | 2.77 | -4.2 |
| 34 | dwingerig       | 0.91 | 1.87 | -4.6 |
| 34 | terminatie      | 0.91 | 1.97 | 1.0  |
| 34 | inglijden       | 0.91 | 1.90 | 0.6  |
| 35 | deconstructief  | 0.91 | 2.10 | 4.1  |
| 35 | generatief      | 0.91 | 2.68 | 3.0  |
| 35 | grafkapel       | 0.91 | 2.93 | 4.1  |
| 35 | eroverheen      | 0.91 | 3.57 | 2.1  |
| 35 | fertilisatie    | 0.91 | 2.50 | 2.2  |
| 35 | schranzen       | 0.91 | 2.02 | -1.9 |
| 35 | fopperij        | 0.91 | 2.43 | -4.5 |
| 35 | veeteler        | 0.91 | 1.81 | 6.3  |
| 35 | decideren       | 0.91 | 1.98 | 3.1  |
| 35 | duellist        | 0.91 | 2.21 | -0.7 |
| 35 | regressief      | 0.91 | 2.75 | 6.0  |
| 35 | onheilig        | 0.90 | 3.33 | 1.0  |
| 35 | erkentenis      | 0.90 | 2.83 | 3.5  |
| 35 | distractie      | 0.90 | 2.07 | -0.5 |
| 35 | wilsgebrek      | 0.90 | 2.35 | 0.8  |
| 35 | objectie        | 0.90 | 2.31 | 4.1  |
| 35 | watertrappen    | 0.90 | 2.91 | 4.0  |
| 35 | ophitsing       | 0.90 | 2.63 | 1.0  |
| 35 | vaardigen       | 0.90 | 3.18 | -2.3 |
| 35 | ouderdag        | 0.90 | 2.03 | 4.0  |
| 36 | incongruentie   | 0.90 | 2.75 | 2.2  |

|    |              |      |      |      |
|----|--------------|------|------|------|
| 36 | spijten      | 0.90 | 2.87 | -1.4 |
| 36 | affectief    | 0.90 | 3.14 | 1.3  |
| 36 | berispelijk  | 0.90 | 2.14 | 2.6  |
| 36 | determinisme | 0.90 | 3.30 | 2.3  |
| 36 | doorspekken  | 0.89 | 2.85 | -3.9 |
| 36 | treuzelig    | 0.89 | 1.00 | -5.0 |
| 36 | uitschateren | 0.89 | 1.76 | 0.4  |
| 36 | kwellerij    | 0.89 | 0.90 | -0.1 |
| 36 | insoppen     | 0.89 | 0.00 | 4.1  |
| 36 | wetgeleerde  | 0.89 | 2.30 | 1.5  |
| 36 | nokvol       | 0.89 | 2.39 | 0.5  |
| 36 | ongeuit      | 0.89 | 0.60 | -0.8 |
| 36 | flansen      | 0.89 | 2.73 | -1.8 |
| 36 | gedans       | 0.89 | 2.42 | -3.1 |
| 36 | omsnoeren    | 0.89 | 1.00 | 4.1  |
| 36 | zorgvol      | 0.89 | 2.34 | 3.8  |
| 36 | afspeuren    | 0.89 | 2.72 | 3.6  |
| 36 | tinkelen     | 0.89 | 2.96 | -4.8 |
| 36 | beleerd      | 0.88 | 2.52 | 0.1  |
| 37 | kosmoloog    | 0.88 | 2.59 | -0.7 |
| 37 | omgrenzen    | 0.88 | 2.01 | 1.2  |
| 37 | gewaterd     | 0.88 | 2.13 | -0.6 |
| 37 | voorhebben   | 0.88 | 2.93 | 3.6  |
| 37 | bergkap      | 0.88 | 0.30 | 0.2  |
| 37 | belezing     | 0.88 | 0.95 | 2.7  |
| 37 | grauwig      | 0.88 | 2.00 | -3.2 |
| 37 | tijdmaat     | 0.88 | 0.78 | 1.7  |
| 37 | divergerend  | 0.88 | 2.18 | 3.7  |
| 37 | smakker      | 0.88 | 0.78 | -2.6 |
| 37 | opraapsel    | 0.88 | 0.00 | 2.2  |
| 37 | regulair     | 0.88 | 1.63 | -4.7 |
| 37 | curatief     | 0.87 | 2.85 | 5.9  |
| 37 | godzalig     | 0.87 | 2.70 | -2.1 |
| 37 | onhelder     | 0.87 | 2.93 | 4.9  |
| 37 | pakbaar      | 0.87 | 0.00 | -3.5 |
| 37 | welgeaard    | 0.87 | 0.30 | -1.7 |
| 37 | opticus      | 0.87 | 2.21 | -0.6 |
| 37 | executant    | 0.87 | 2.53 | -3.2 |
| 37 | affluiten    | 0.87 | 0.85 | 4.0  |
| 38 | badkuur      | 0.87 | 2.18 | 3.1  |
| 38 | zelfachting  | 0.87 | 2.21 | 4.0  |
| 38 | zwaarheid    | 0.87 | 2.20 | 1.7  |
| 38 | vitalist     | 0.87 | 3.63 | 5.5  |
| 38 | ertegenover  | 0.87 | 3.16 | 4.2  |
| 38 | dwarshoofd   | 0.87 | 0.00 | 3.7  |
| 38 | opproppen    | 0.86 | 0.70 | -5.7 |
| 38 | toebuigen    | 0.86 | 1.87 | 2.1  |
| 38 | lymf         | 0.86 | 2.08 | 3.6  |
| 38 | besnoeien    | 0.86 | 2.42 | 4.2  |
| 38 | expliciteren | 0.86 | 3.21 | -4.8 |
| 38 | zinsritme    | 0.86 | 2.20 | -2.3 |
| 38 | telkaart     | 0.86 | 0.95 | 0.2  |
| 38 | rijmer       | 0.86 | 3.14 | -4.2 |

|    |              |      |      |      |
|----|--------------|------|------|------|
| 38 | almaar       | 0.85 | 3.85 | 3.6  |
| 38 | afvliegen    | 0.85 | 2.56 | -2.2 |
| 38 | nablaffen    | 0.85 | 0.30 | -1.8 |
| 38 | petrischaal  | 0.85 | 1.91 | -3.8 |
| 38 | dunheid      | 0.85 | 2.20 | 3.0  |
| 38 | zaniker      | 0.85 | 1.66 | -0.5 |
| 39 | condoleantie | 0.84 | 1.85 | -6.3 |
| 39 | toehalen     | 0.84 | 2.17 | 3.4  |
| 39 | zwerfblok    | 0.84 | 0.70 | -2.9 |
| 39 | ruiler       | 0.84 | 1.76 | -1.9 |
| 39 | stembreuk    | 0.84 | 0.95 | 3.7  |
| 39 | stoorder     | 0.84 | 2.17 | 2.4  |
| 39 | klammig      | 0.84 | 1.62 | -7.3 |
| 39 | harpenist    | 0.84 | 0.70 | -4.0 |
| 39 | bijenboer    | 0.84 | 0.00 | -2.6 |
| 39 | hinkelaar    | 0.84 | 0.60 | 1.2  |
| 39 | druksel      | 0.83 | 3.32 | 0.4  |
| 39 | bonthheid    | 0.83 | 2.46 | -6.2 |
| 39 | prevalentie  | 0.83 | 3.13 | -7.0 |
| 39 | bespikkelen  | 0.83 | 0.70 | -4.3 |
| 39 | koploos      | 0.83 | 0.30 | -4.5 |
| 39 | aangehuwd    | 0.83 | 1.00 | -6.6 |
| 39 | extraheren   | 0.83 | 2.42 | 3.4  |
| 39 | wegsterven   | 0.83 | 3.07 | -3.8 |
| 39 | drukvel      | 0.83 | 1.00 | 5.1  |
| 39 | instormen    | 0.83 | 1.89 | -3.4 |
| 40 | erfhuis      | 0.83 | 2.46 | 6.7  |
| 40 | bijliggen    | 0.83 | 2.44 | 1.1  |
| 40 | groeipad     | 0.82 | 2.48 | 1.0  |
| 40 | vetput       | 0.82 | 0.60 | -6.3 |
| 40 | bijspelen    | 0.82 | 0.90 | -3.6 |
| 40 | gevest       | 0.82 | 2.90 | -4.1 |
| 40 | huisgod      | 0.82 | 2.74 | -0.6 |
| 40 | purperen     | 0.82 | 3.71 | -0.8 |
| 40 | predicatief  | 0.82 | 2.45 | 1.7  |
| 40 | loopdag      | 0.82 | 0.48 | -2.0 |
| 40 | maffer       | 0.82 | 3.50 | -5.4 |
| 40 | vetbuik      | 0.82 | 0.60 | 1.5  |
| 40 | mediaal      | 0.81 | 2.83 | 6.1  |
| 40 | platkop      | 0.81 | 1.43 | 1.3  |
| 40 | vergrauwd    | 0.81 | 2.10 | 4.6  |
| 40 | poolshoogte  | 0.81 | 3.41 | -0.3 |
| 40 | lamelle      | 0.81 | 1.87 | -7.5 |
| 40 | snaterbek    | 0.81 | 0.70 | 0.3  |
| 40 | delegaaf     | 0.81 | 2.24 | 1.8  |
| 40 | dekstuk      | 0.81 | 1.60 | -3.0 |
| 41 | kruisnet     | 0.80 | 1.94 | 2.1  |
| 41 | afkrabsel    | 0.80 | 0.00 | 6.0  |
| 41 | vermaking    | 0.80 | 2.01 | 3.1  |
| 41 | radiatie     | 0.80 | 2.19 | 9.5  |
| 41 | biogeen      | 0.80 | 0.95 | -1.1 |
| 41 | futselen     | 0.79 | 1.86 | -4.0 |
| 41 | onsubtiel    | 0.79 | 1.88 | 6.1  |

|    |                |      |      |      |
|----|----------------|------|------|------|
| 41 | sopperig       | 0.79 | 0.78 | -7.0 |
| 41 | patroneren     | 0.79 | 2.13 | 7.3  |
| 41 | sperren        | 0.79 | 2.63 | 2.5  |
| 41 | aanmengen      | 0.79 | 0.48 | -4.3 |
| 41 | verzouten      | 0.79 | 2.10 | 3.4  |
| 41 | endotherm      | 0.78 | 0.85 | 1.0  |
| 41 | zilverig       | 0.78 | 2.95 | -1.5 |
| 41 | katalyse       | 0.78 | 2.53 | 8.5  |
| 41 | leesgraag      | 0.78 | 2.06 | -0.6 |
| 41 | blondheid      | 0.78 | 2.13 | 2.0  |
| 41 | legalisme      | 0.78 | 2.50 | -1.5 |
| 41 | homeostase     | 0.78 | 2.70 | -2.0 |
| 41 | trekvis        | 0.78 | 0.95 | 2.8  |
| 42 | polynoom       | 0.78 | 2.24 | -6.7 |
| 42 | eedbreuk       | 0.78 | 1.87 | 2.9  |
| 42 | eelterig       | 0.78 | 0.00 | 9.1  |
| 42 | ordinaat       | 0.77 | 1.75 | 3.4  |
| 42 | enigst         | 0.77 | 2.59 | -7.3 |
| 42 | omdoping       | 0.77 | 1.88 | -1.6 |
| 42 | omtollen       | 0.77 | 0.00 | -5.3 |
| 42 | gloeierig      | 0.76 | 0.00 | 6.6  |
| 42 | steilte        | 0.76 | 2.64 | -5.6 |
| 42 | stamgod        | 0.76 | 2.28 | -0.8 |
| 42 | hersmeden      | 0.76 | 1.80 | 7.0  |
| 42 | bemoeiing      | 0.76 | 2.60 | 3.4  |
| 42 | pruttelig      | 0.76 | 0.00 | -1.9 |
| 42 | oproeien       | 0.76 | 2.56 | -0.9 |
| 42 | casseren       | 0.76 | 2.27 | -5.1 |
| 42 | animaal        | 0.76 | 2.94 | 7.1  |
| 42 | heterofilie    | 0.75 | 0.00 | 6.8  |
| 42 | afdoener       | 0.75 | 0.70 | -6.5 |
| 42 | zinking        | 0.75 | 1.93 | -4.6 |
| 42 | ontzinken      | 0.75 | 2.13 | 4.6  |
| 43 | taxonoom       | 0.75 | 2.26 | 4.7  |
| 43 | slijping       | 0.75 | 0.30 | -0.4 |
| 43 | fonoloog       | 0.74 | 1.94 | 4.7  |
| 43 | libertair      | 0.74 | 2.85 | 4.5  |
| 43 | annoteren      | 0.74 | 2.80 | -8.9 |
| 43 | kruisarm       | 0.73 | 1.62 | -4.0 |
| 43 | inbegrip       | 0.73 | 3.74 | 3.1  |
| 43 | poezig         | 0.73 | 2.33 | 5.9  |
| 43 | brongas        | 0.73 | 0.70 | 1.5  |
| 43 | deprivatie     | 0.73 | 2.81 | 3.2  |
| 43 | drijftol       | 0.73 | 0.95 | -3.4 |
| 43 | fenotype       | 0.73 | 2.49 | 5.6  |
| 43 | bijenstal      | 0.72 | 2.62 | -5.9 |
| 43 | ijsschuit      | 0.72 | 1.89 | -5.8 |
| 43 | insolide       | 0.72 | 0.48 | 8.3  |
| 43 | bekruisen      | 0.72 | 1.76 | 4.5  |
| 43 | universaliteit | 0.72 | 3.31 | 4.3  |
| 43 | aversief       | 0.72 | 1.79 | 7.2  |
| 43 | hartroerend    | 0.72 | 2.54 | -8.5 |
| 43 | morzelen       | 0.71 | 0.60 | 2.2  |

|    |              |      |      |      |
|----|--------------|------|------|------|
| 44 | overjagen    | 0.71 | 0.30 | 6.9  |
| 44 | aansmeden    | 0.71 | 0.00 | 7.5  |
| 44 | siersel      | 0.71 | 2.31 | 4.5  |
| 44 | wortelig     | 0.70 | 0.30 | -1.9 |
| 44 | zegswijs     | 0.70 | 1.41 | 1.0  |
| 44 | wolgoed      | 0.70 | 0.30 | -1.0 |
| 44 | stuifbal     | 0.70 | 0.48 | -0.7 |
| 44 | lobberig     | 0.69 | 0.00 | -5.4 |
| 44 | demissie     | 0.69 | 2.31 | 5.9  |
| 44 | peigeren     | 0.69 | 1.86 | 7.6  |
| 44 | soezig       | 0.69 | 1.90 | -6.3 |
| 44 | pedologie    | 0.69 | 2.28 | -5.3 |
| 44 | reflexief    | 0.69 | 3.13 | 7.7  |
| 44 | voorwal      | 0.68 | 0.30 | -7.1 |
| 44 | bekappen     | 0.68 | 0.95 | -0.6 |
| 44 | totaliter    | 0.68 | 2.34 | 2.6  |
| 44 | sufferig     | 0.68 | 1.85 | 9.4  |
| 44 | biggelen     | 0.68 | 2.66 | -5.4 |
| 44 | nestvlieder  | 0.68 | 1.73 | -6.1 |
| 44 | cellijn      | 0.68 | 1.79 | -2.7 |
| 45 | inexact      | 0.67 | 2.33 | 1.4  |
| 45 | prohibitief  | 0.67 | 2.20 | 4.4  |
| 45 | afbietsen    | 0.67 | 0.00 | -3.7 |
| 45 | beknorren    | 0.67 | 1.72 | -7.0 |
| 45 | omdwalen     | 0.67 | 0.78 | -4.8 |
| 45 | incidentie   | 0.67 | 3.14 | 4.6  |
| 45 | cesarisme    | 0.66 | 0.90 | 1.6  |
| 45 | dompen       | 0.66 | 1.92 | -1.5 |
| 45 | knarsing     | 0.66 | 0.70 | 2.2  |
| 45 | woestaard    | 0.66 | 2.22 | -8.2 |
| 45 | pretorium    | 0.66 | 1.85 | 7.6  |
| 45 | sidderrog    | 0.65 | 2.09 | 7.9  |
| 45 | pletteren    | 0.65 | 1.91 | -1.7 |
| 45 | impenetrabel | 0.65 | 0.48 | 0.5  |
| 45 | hagelsnoer   | 0.65 | 0.60 | 1.4  |
| 45 | raagbol      | 0.64 | 1.48 | -3.0 |
| 45 | belijmen     | 0.64 | 0.48 | 0.6  |
| 45 | tolplan      | 0.64 | 0.00 | 4.6  |
| 45 | invangen     | 0.64 | 1.61 | -8.0 |
| 45 | flinterig    | 0.64 | 0.48 | -0.4 |
| 46 | stijgtijd    | 0.63 | 0.48 | 3.8  |
| 46 | kraanoog     | 0.62 | 0.00 | 4.3  |
| 46 | bijbank      | 0.62 | 2.38 | 1.0  |
| 46 | diastolisch  | 0.62 | 1.86 | 4.7  |
| 46 | stilet       | 0.62 | 2.64 | -6.2 |
| 46 | spinaal      | 0.61 | 1.94 | 6.4  |
| 46 | klankwet     | 0.61 | 2.06 | 3.8  |
| 46 | arterieel    | 0.61 | 2.28 | 3.6  |
| 46 | ontstelen    | 0.61 | 2.46 | 5.0  |
| 46 | juvenaat     | 0.61 | 2.45 | -1.0 |
| 46 | presumptie   | 0.61 | 2.41 | 9.6  |
| 46 | duimeling    | 0.60 | 0.78 | 1.7  |
| 46 | duplolamp    | 0.60 | 0.30 | -4.6 |

|    |               |      |      |      |
|----|---------------|------|------|------|
| 46 | oncogeen      | 0.60 | 0.70 | 7.8  |
| 46 | donderaar     | 0.60 | 1.80 | -2.8 |
| 46 | situatief     | 0.60 | 2.16 | -6.8 |
| 46 | ijseend       | 0.60 | 0.85 | 5.3  |
| 46 | voltekend     | 0.59 | 1.68 | 4.8  |
| 46 | verzenuwd     | 0.59 | 2.02 | 0.3  |
| 46 | strammig      | 0.59 | 0.00 | -3.9 |
| 47 | toongat       | 0.58 | 0.30 | -2.6 |
| 47 | paganist      | 0.58 | 1.92 | -3.5 |
| 47 | puncteren     | 0.58 | 1.70 | 1.3  |
| 47 | zuigsnuit     | 0.58 | 1.62 | -6.0 |
| 47 | watteren      | 0.58 | 1.62 | -1.2 |
| 47 | serologie     | 0.58 | 2.01 | 4.0  |
| 47 | weduwgift     | 0.57 | 0.00 | 6.1  |
| 47 | afmijnen      | 0.57 | 0.90 | -9.1 |
| 47 | anomie        | 0.57 | 2.69 | 3.2  |
| 47 | keelzak       | 0.57 | 2.07 | 2.0  |
| 47 | liniatuur     | 0.56 | 0.95 | 1.9  |
| 47 | equatie       | 0.56 | 2.26 | 8.5  |
| 47 | ratsen        | 0.56 | 1.97 | 5.4  |
| 47 | triarchie     | 0.55 | 0.70 | 8.4  |
| 47 | bindwilg      | 0.55 | 1.00 | -5.0 |
| 47 | afzanding     | 0.55 | 1.76 | 0.1  |
| 47 | lipogram      | 0.55 | 2.51 | 3.8  |
| 47 | retorsie      | 0.54 | 2.08 | 7.9  |
| 47 | homonymie     | 0.54 | 2.74 | 7.7  |
| 47 | betering      | 0.54 | 2.73 | 4.8  |
| 48 | cyanose       | 0.53 | 2.13 | -2.8 |
| 48 | confiseur     | 0.53 | 2.49 | 1.6  |
| 48 | sarrig        | 0.53 | 0.48 | -8.8 |
| 48 | neuronaal     | 0.52 | 1.95 | 9.8  |
| 48 | patroniem     | 0.52 | 2.72 | 8.9  |
| 48 | dekhuis       | 0.52 | 1.72 | 2.9  |
| 48 | ijsappel      | 0.51 | 0.30 | 7.9  |
| 48 | exemplair     | 0.50 | 1.77 | 4.8  |
| 48 | keuterij      | 0.50 | 0.60 | 8.6  |
| 48 | afmijning     | 0.50 | 0.48 | -9.4 |
| 48 | walgang       | 0.50 | 0.78 | -3.7 |
| 48 | pronomen      | 0.49 | 3.07 | 6.4  |
| 48 | waaraf        | 0.49 | 2.64 | 7.4  |
| 48 | desambigueren | 0.48 | 0.85 | 8.4  |
| 48 | indologie     | 0.48 | 2.82 | 2.1  |
| 48 | titreren      | 0.48 | 1.64 | 1.4  |
| 48 | palatum       | 0.48 | 2.21 | 6.8  |
| 48 | mesoderm      | 0.48 | 1.79 | 4.5  |
| 48 | cultisch      | 0.48 | 2.30 | -0.5 |
| 48 | roffelig      | 0.48 | 0.00 | -1.1 |
| 49 | pakmand       | 0.47 | 0.60 | 1.1  |
| 49 | maatvis       | 0.47 | 0.00 | -4.7 |
| 49 | schoring      | 0.46 | 0.70 | -4.3 |
| 49 | ossuarium     | 0.45 | 2.41 | 7.1  |
| 49 | failleren     | 0.45 | 2.02 | 1.3  |
| 49 | tijrivier     | 0.45 | 0.30 | 3.5  |



|    |              |      |      |      |
|----|--------------|------|------|------|
| 49 | heliosis     | 0.44 | 2.68 | 6.3  |
| 49 | statieus     | 0.43 | 0.85 | -3.7 |
| 49 | chiasma      | 0.43 | 2.18 | -3.9 |
| 49 | klipvis      | 0.43 | 1.93 | -2.1 |
| 49 | tanktas      | 0.43 | 0.00 | -7.5 |
| 49 | persevereren | 0.43 | 0.90 | 6.3  |
| 49 | tablatuur    | 0.42 | 0.60 | 11.0 |
| 49 | macrofaag    | 0.42 | 1.60 | 5.7  |
| 49 | tekenaap     | 0.42 | 0.85 | -4.1 |
| 49 | raseren      | 0.42 | 1.62 | 2.9  |
| 49 | oxidase      | 0.42 | 2.43 | 6.2  |
| 49 | bomig        | 0.42 | 0.00 | -0.5 |
| 49 | statuesk     | 0.42 | 0.60 | 6.4  |
| 49 | trachiet     | 0.41 | 2.45 | -6.1 |
| 50 | judicium     | 0.41 | 2.61 | 1.3  |
| 50 | pernicieus   | 0.41 | 2.15 | 4.2  |
| 50 | decaloog     | 0.41 | 2.61 | 4.4  |
| 50 | trypsine     | 0.40 | 1.71 | 4.0  |
| 50 | fibril       | 0.39 | 1.43 | 9.0  |
| 50 | smedig       | 0.39 | 2.23 | 0.2  |
| 50 | velijn       | 0.39 | 3.07 | -4.9 |
| 50 | heisteren    | 0.39 | 0.48 | -7.6 |
| 50 | glosseren    | 0.38 | 0.78 | 5.8  |
| 50 | slinking     | 0.38 | 0.90 | -1.8 |
| 50 | gebroekt     | 0.38 | 1.00 | -2.0 |
| 50 | ostracisme   | 0.37 | 2.66 | 8.1  |
| 50 | galantine    | 0.37 | 0.90 | -2.1 |
| 50 | egotisme     | 0.37 | 2.53 | 5.0  |
| 50 | majoraat     | 0.37 | 1.82 | 5.8  |
| 50 | ritueel      | 0.37 | 2.72 | -5.8 |
| 50 | teratogeen   | 0.36 | 1.72 | 8.5  |
| 50 | bentoniet    | 0.36 | 1.82 | -2.8 |
| 50 | picogram     | 0.36 | 0.78 | -3.5 |
| 50 | dalmatiek    | 0.35 | 1.98 | 7.7  |
| 51 | revideren    | 0.35 | 1.81 | -8.3 |
| 51 | axon         | 0.34 | 2.55 | 9.8  |
| 51 | vasopressine | 0.33 | 2.19 | 3.6  |
| 51 | stuwage      | 0.33 | 1.81 | 4.9  |
| 51 | meerkol      | 0.33 | 0.30 | 6.8  |
| 51 | titaniem     | 0.32 | 0.90 | 3.7  |
| 51 | neutrum      | 0.32 | 2.59 | -1.4 |
| 51 | repelen      | 0.32 | 1.00 | -4.0 |
| 51 | lemuur       | 0.32 | 1.62 | 0.1  |
| 51 | kordeel      | 0.31 | 0.00 | 8.4  |
| 51 | illiquide    | 0.31 | 1.67 | 2.7  |
| 51 | gitten       | 0.31 | 2.43 | -4.3 |
| 51 | hortoloog    | 0.30 | 2.19 | 7.0  |
| 51 | holoniem     | 0.30 | 0.00 | 2.5  |
| 51 | trigram      | 0.30 | 1.99 | -3.2 |
| 51 | talhout      | 0.30 | 2.26 | -4.2 |
| 51 | provenu      | 0.28 | 1.94 | 2.9  |
| 51 | siderisch    | 0.28 | 1.91 | 0.8  |
| 51 | quaestrix    | 0.28 | 0.70 | -0.6 |

|    |            |      |      |      |
|----|------------|------|------|------|
| 51 | fomenteren | 0.27 | 0.48 | 1.9  |
| 52 | exantheem  | 0.26 | 1.88 | -0.6 |
| 52 | cenotaaf   | 0.26 | 2.86 | 9.9  |
| 52 | spinel     | 0.25 | 2.15 | 0.2  |
| 52 | vaceren    | 0.25 | 2.06 | -7.9 |
| 52 | refactie   | 0.24 | 0.48 | 2.1  |
| 52 | rekwirant  | 0.24 | 0.95 | 4.9  |
| 52 | miasma     | 0.23 | 2.46 | -4.3 |
| 52 | kloptor    | 0.23 | 0.30 | -2.2 |
| 52 | strekel    | 0.22 | 0.78 | -2.1 |
| 52 | grafeem    | 0.22 | 2.37 | -1.9 |
| 52 | katabool   | 0.21 | 1.00 | 8.1  |
| 52 | pellagra   | 0.21 | 2.06 | -2.2 |
| 52 | solipsist  | 0.21 | 3.41 | -2.1 |
| 52 | jangat     | 0.21 | 0.48 | -0.6 |
| 52 | prosodie   | 0.20 | 3.22 | 8.4  |
| 52 | mantiek    | 0.20 | 2.57 | 0.4  |
| 52 | sinopel    | 0.20 | 2.43 | 3.0  |
| 52 | sluif      | 0.20 | 0.48 | 5.0  |
| 52 | dukaton    | 0.19 | 2.04 | -7.0 |
| 52 | paplam     | 0.19 | 0.60 | -2.8 |
| 53 | harpuis    | 0.19 | 1.76 | 1.4  |
| 53 | anakoloet  | 0.18 | 2.40 | -4.6 |
| 53 | meristeem  | 0.18 | 1.63 | -2.2 |
| 53 | heulsap    | 0.17 | 1.95 | -4.9 |
| 53 | viaticum   | 0.16 | 2.48 | 2.2  |
| 53 | labarum    | 0.16 | 2.66 | -3.0 |
| 53 | salpicon   | 0.16 | 0.90 | 3.5  |
| 53 | grietenij  | 0.16 | 2.85 | -4.5 |
| 53 | pelagiaan  | 0.15 | 0.70 | 1.7  |
| 53 | liplap     | 0.15 | 2.22 | 3.4  |
| 53 | acribie    | 0.15 | 2.78 | 0.1  |
| 53 | indult     | 0.14 | 2.04 | -3.7 |
| 53 | decalogus  | 0.14 | 0.85 | 3.3  |
| 53 | kwabaal    | 0.14 | 2.00 | 6.3  |
| 53 | beug       | 0.14 | 2.28 | 5.1  |
| 53 | silurisch  | 0.14 | 0.30 | 2.9  |
| 53 | zwade      | 0.13 | 0.90 | -1.0 |
| 53 | apocope    | 0.12 | 2.67 | 4.7  |
| 53 | salangaan  | 0.12 | 0.60 | 0.4  |
| 53 | lumbecken  | 0.11 | 1.88 | -0.4 |
| 54 | deiktisch  | 0.10 | 2.08 | 1.0  |
| 54 | slatten    | 0.10 | 0.48 | -0.7 |
| 54 | smuiger    | 0.10 | 0.60 | -0.3 |
| 54 | jarosiet   | 0.09 | 0.95 | 3.2  |
| 54 | putto      | 0.09 | 3.24 | 1.8  |
| 54 | entrijs    | 0.08 | 0.00 | -3.8 |
| 54 | malvezij   | 0.07 | 0.95 | -1.0 |
| 54 | salmi      | 0.07 | 2.57 | 1.6  |
| 54 | pinyin     | 0.06 | 2.64 | 2.2  |
| 54 | kebon      | 0.06 | 2.76 | -1.9 |
| 54 | seider     | 0.05 | 2.39 | -0.8 |
| 54 | loeach     | 0.05 | 0.90 | 0.6  |

|    |          |      |      |     |
|----|----------|------|------|-----|
| 54 | romusha  | 0.04 | 2.81 | 0.0 |
| 54 | sfagnum  | 0.04 | 0.70 | 1.7 |
| 54 | tussor   | 0.03 | 0.60 | 1.4 |
| 54 | ghazel   | 0.03 | 2.18 | 0.0 |
| 54 | dawet    | 0.03 | 0.70 | 0.0 |
| 54 | ypresien | 0.03 | 0.70 | 1.6 |
| 54 | saguweer | 0.02 | 1.60 | 0.5 |
| 54 | hoedna   | 0.02 | 0.78 | 0.0 |

Run 2: Non-words

| <b>Non-word</b> | <b>%correct<br/>Belgium</b> | <b>%correct<br/>Netherlands</b> | <b>Difference<br/>Belgium/<br/>Netherlands</b> |
|-----------------|-----------------------------|---------------------------------|------------------------------------------------|
| aangringen      | 91.8                        | 92.8                            | -1                                             |
| aanjonterlijk   | 93.7                        | 95.5                            | -1.8                                           |
| aanschagenen    | 90.6                        | 91                              | -0.3                                           |
| aarberheid      | 96.1                        | 94.4                            | 1.6                                            |
| abkupt          | 97.4                        | 97.5                            | -0.1                                           |
| ablociltuur     | 92.5                        | 92.2                            | 0.3                                            |
| adaandes        | 97.1                        | 97.1                            | 0                                              |
| adpront         | 95.2                        | 94.1                            | 1.1                                            |
| adukreker       | 96                          | 97.4                            | -1.4                                           |
| adwanderen      | 96.7                        | 96.3                            | 0.4                                            |
| afbas           | 94.3                        | 92.4                            | 1.9                                            |
| afgerstrezen    | 97.4                        | 97.7                            | -0.2                                           |
| afrepent        | 92.2                        | 94.6                            | -2.4                                           |
| agsinent        | 95.6                        | 95.2                            | 0.4                                            |
| agumotie        | 91.3                        | 90.9                            | 0.4                                            |
| akeer           | 90.6                        | 93.5                            | -2.9                                           |
| aketolief       | 93.5                        | 92                              | 1.6                                            |
| akitet          | 94.9                        | 97.9                            | -3                                             |
| akkerief        | 95.3                        | 95.3                            | 0                                              |
| aktheminaren    | 90.8                        | 92.7                            | -1.9                                           |
| alapilitie      | 91.7                        | 94.3                            | -2.6                                           |
| algeziet        | 92.3                        | 91.7                            | 0.7                                            |
| alortstoding    | 97                          | 97                              | 0                                              |
| amektel         | 96.6                        | 96.2                            | 0.3                                            |
| ampekestigd     | 97.4                        | 97.4                            | 0                                              |
| ampetwinsbaar   | 96.4                        | 97                              | -0.6                                           |
| amunt           | 92.5                        | 91                              | 1.5                                            |
| amusazist       | 93.2                        | 90.4                            | 2.8                                            |
| andstopt        | 97.2                        | 97.3                            | -0.1                                           |
| angedeling      | 96.3                        | 96.2                            | 0.1                                            |
| angraar         | 93.2                        | 94.1                            | -0.9                                           |
| anschorp        | 96.1                        | 97.2                            | -1                                             |
| apennatig       | 92.6                        | 92                              | 0.6                                            |
| aperuild        | 97.4                        | 97.8                            | -0.4                                           |
| aplordigen      | 97.7                        | 96.6                            | 1.1                                            |
| apmuselief      | 97.8                        | 96.3                            | 1.5                                            |
| aprennief       | 94.5                        | 94                              | 0.5                                            |
| arachteleem     | 94                          | 95.9                            | -2                                             |

|                  |      |      |      |
|------------------|------|------|------|
| arfoezelen       | 93.4 | 95   | -1.6 |
| artilef          | 93.2 | 92.8 | 0.4  |
| aruindig         | 94.2 | 92.9 | 1.3  |
| asdanonaal       | 92.2 | 95.5 | -3.3 |
| asdilaal         | 90.5 | 92.3 | -1.7 |
| asseldig         | 96.2 | 96.7 | -0.6 |
| astemeeslijk     | 95.8 | 95.2 | 0.6  |
| asteraards       | 90.1 | 93.8 | -3.7 |
| astienen         | 91.8 | 96.4 | -4.6 |
| atalsmaal        | 97   | 96   | 1    |
| atendueen        | 92.3 | 93.3 | -1   |
| aterboren        | 96.4 | 96   | 0.4  |
| atsel            | 95.2 | 93.5 | 1.7  |
| attikt           | 96.5 | 95.5 | 1    |
| awanteur         | 92.8 | 95.7 | -3   |
| bajoktrant       | 95.3 | 93.1 | 2.3  |
| ballelliek       | 94.4 | 92.5 | 1.9  |
| bameen           | 96.8 | 95.4 | 1.4  |
| bamitoseran      | 90.4 | 94.4 | -4   |
| banstelijk       | 94.3 | 94.3 | 0    |
| basrikton        | 97.6 | 96.9 | 0.7  |
| bastarheid       | 94.3 | 96   | -1.7 |
| bebriepig        | 95.5 | 96   | -0.5 |
| bechts           | 96   | 96.5 | -0.5 |
| bedrannik        | 96.3 | 97.5 | -1.2 |
| begildig         | 94.1 | 91.8 | 2.3  |
| bekattupeerd     | 94.4 | 94.1 | 0.3  |
| bekelijk         | 93.3 | 91.7 | 1.6  |
| bekeutoging      | 96.4 | 96   | 0.4  |
| belonzelijk      | 96.3 | 94.9 | 1.4  |
| bemokend         | 90.4 | 93   | -2.6 |
| bendasta         | 96.5 | 97.1 | -0.6 |
| benebbel         | 96   | 91.9 | 4.1  |
| bepeudigen       | 94.9 | 96.6 | -1.7 |
| berantweerdeteit | 97.1 | 97.5 | -0.3 |
| berdeeft         | 96.5 | 96.6 | -0.2 |
| berdemd          | 96.7 | 97.7 | -1   |
| berdomelen       | 95.9 | 97.3 | -1.4 |
| berennelen       | 92.7 | 95.7 | -3   |
| berhakkening     | 94.4 | 94.8 | -0.5 |
| berkaaïen        | 92.1 | 90.1 | 2    |
| berkleiten       | 94.8 | 96.1 | -1.3 |
| berkluitig       | 91.8 | 92.4 | -0.6 |
| berknelpen       | 94.2 | 95.7 | -1.5 |
| berkoer          | 92.6 | 94.1 | -1.5 |
| bermaring        | 97.6 | 97.3 | 0.2  |
| bermegen         | 96   | 96.7 | -0.8 |
| bermoring        | 95.5 | 97   | -1.5 |
| bermurmen        | 96   | 94.7 | 1.3  |
| berobaren        | 94.5 | 96.2 | -1.6 |
| berrillelijk     | 97.5 | 91.7 | 5.8  |
| berschieking     | 96.8 | 97.4 | -0.6 |
| berspreuking     | 93.7 | 93.1 | 0.6  |

|               |      |      |      |
|---------------|------|------|------|
| berstraaid    | 94.5 | 94.4 | 0.1  |
| berveugd      | 96.6 | 94.8 | 1.7  |
| bervichten    | 96.8 | 97.2 | -0.5 |
| berzieging    | 95.6 | 96   | -0.3 |
| beschreeg     | 91.5 | 90.8 | 0.8  |
| besleek       | 91.9 | 90.8 | 1.1  |
| bespreizing   | 94.3 | 94.3 | 0    |
| bespreiring   | 94.3 | 91.8 | 2.5  |
| betijring     | 90   | 90.2 | -0.1 |
| betrallel     | 96.7 | 95   | 1.7  |
| bieuw         | 95.6 | 96.4 | -0.8 |
| bijbarting    | 91.6 | 93.7 | -2.1 |
| bijtole       | 96.4 | 96.8 | -0.5 |
| bladetig      | 96.4 | 94.4 | 2    |
| blankelen     | 92.8 | 90.5 | 2.3  |
| blanstig      | 91.7 | 95.6 | -3.9 |
| bleetbaar     | 97   | 97.4 | -0.4 |
| bleubel       | 95   | 95.1 | -0.1 |
| bloefpe       | 97.3 | 97.6 | -0.3 |
| blort         | 96   | 96.6 | -0.6 |
| bodervlaad    | 94.5 | 96.8 | -2.2 |
| bolsode       | 93   | 94.9 | -1.8 |
| boltpomier    | 93   | 96.3 | -3.3 |
| braar         | 93.6 | 93.3 | 0.3  |
| brapering     | 96.9 | 96   | 0.9  |
| brapla        | 97.4 | 97.3 | 0.1  |
| breep         | 95.1 | 94.9 | 0.2  |
| brelder       | 95.5 | 96.2 | -0.8 |
| broeg         | 90.5 | 93.7 | -3.1 |
| brog          | 91.8 | 91.8 | 0    |
| brongen       | 93.1 | 95   | -1.8 |
| broorroos     | 97.3 | 97.1 | 0.2  |
| calalect      | 92.4 | 93.7 | -1.3 |
| callepaneel   | 91.3 | 92.1 | -0.7 |
| castroek      | 94.7 | 95.6 | -1   |
| coddactie     | 90.9 | 95.2 | -4.3 |
| comgemetie    | 93.7 | 94.4 | -0.7 |
| congildie     | 95.6 | 93.4 | 2.1  |
| conjentralen  | 92.4 | 95.4 | -3   |
| contallaren   | 95.1 | 94.2 | 0.9  |
| contokistaal  | 90.6 | 94   | -3.4 |
| contrellaren  | 95.7 | 95.2 | 0.4  |
| corbemitie    | 93.1 | 92.7 | 0.4  |
| corlesitie    | 91.5 | 91.5 | -0.1 |
| corrublindent | 91.4 | 94.6 | -3.2 |
| corstorte     | 93.2 | 95.1 | -1.9 |
| cougeise      | 96.5 | 94.8 | 1.7  |
| daargemmenin  | 97.2 | 97.1 | 0.1  |
| darfect       | 96.1 | 96   | 0.1  |
| dargel        | 95.1 | 93.7 | 1.4  |
| dasken        | 93.3 | 93.5 | -0.2 |
| debivet       | 90.8 | 92   | -1.1 |
| degisch       | 91.1 | 92.4 | -1.3 |

|               |      |      |      |
|---------------|------|------|------|
| deharstructie | 93.5 | 92.3 | 1.2  |
| dehomueel     | 95.6 | 95.1 | 0.5  |
| delinkpandel  | 97.2 | 97   | 0.1  |
| demaans       | 90.1 | 92   | -1.9 |
| derebas       | 95   | 93.9 | 1.1  |
| derultor      | 94.2 | 96.9 | -2.7 |
| desakentie    | 94.4 | 97.5 | -3.1 |
| deskelijk     | 96.5 | 97   | -0.5 |
| detig         | 91.7 | 93.4 | -1.6 |
| devensbiel    | 97.1 | 97.2 | -0.1 |
| dierdig       | 91.7 | 90.9 | 0.9  |
| dimestolieel  | 90.6 | 93.7 | -3.1 |
| dimor         | 91.4 | 96.4 | -5   |
| dochtkrij     | 94.1 | 95.3 | -1.2 |
| dofikotief    | 93.7 | 96.2 | -2.5 |
| doleton       | 94.5 | 93   | 1.5  |
| domibel       | 90.7 | 94.9 | -4.2 |
| dookels       | 97.2 | 97   | 0.1  |
| doornarstoken | 93.4 | 95.4 | -2   |
| doorwijns     | 91.4 | 92.3 | -0.9 |
| drant         | 91.3 | 95.7 | -4.4 |
| drapolen      | 92.3 | 92.8 | -0.5 |
| drorzeloos    | 96.5 | 96.9 | -0.4 |
| duiketing     | 96.8 | 96   | 0.8  |
| dunileins     | 96.5 | 97.2 | -0.6 |
| dymkactisch   | 92.1 | 96.3 | -4.2 |
| efject        | 96.3 | 94.6 | 1.6  |
| egenweist     | 97.5 | 96.4 | 1    |
| eggrotie      | 91.1 | 93.6 | -2.5 |
| egknotisch    | 96.6 | 95.3 | 1.3  |
| eiltede       | 94.5 | 96.7 | -2.2 |
| ekaldiek      | 91.2 | 94.2 | -3   |
| ellepitie     | 92.4 | 94.1 | -1.7 |
| ematintatie   | 92.4 | 93.4 | -1.1 |
| embabron      | 90.9 | 91.2 | -0.3 |
| enturmen      | 90.1 | 95.1 | -5   |
| enzap         | 97.8 | 97   | 0.8  |
| erkarts       | 94.2 | 96.6 | -2.4 |
| eukereed      | 95.9 | 97.4 | -1.5 |
| fabroet       | 95.4 | 96.7 | -1.2 |
| fafial        | 95.6 | 96.4 | -0.8 |
| fagawel       | 96.1 | 96.3 | -0.2 |
| faliliedeen   | 93   | 94.1 | -1.1 |
| feis          | 92.5 | 93.7 | -1.2 |
| figuis        | 90.4 | 92.4 | -2   |
| filfiet       | 95.2 | 92.8 | 2.4  |
| fiteek        | 94.2 | 97.7 | -3.5 |
| fitgeraal     | 94   | 95.4 | -1.4 |
| fitken        | 96.5 | 97.3 | -0.8 |
| flazapeut     | 94.2 | 95.7 | -1.6 |
| flepelijk     | 94.4 | 97   | -2.6 |
| flepen        | 91.9 | 94.4 | -2.5 |
| flibbel       | 94.5 | 93.5 | 0.9  |

|               |      |      |      |
|---------------|------|------|------|
| flonstelen    | 93.2 | 95.7 | -2.5 |
| flonstelend   | 93   | 94.2 | -1.2 |
| flusegen      | 95.6 | 97.7 | -2.1 |
| fluwaag       | 94.1 | 95.5 | -1.4 |
| fomiheer      | 97.5 | 95.6 | 1.9  |
| fortorij      | 92   | 92.3 | -0.3 |
| fragteur      | 95.1 | 90.6 | 4.5  |
| frideurlet    | 95.9 | 96.2 | -0.2 |
| frimekel      | 95.2 | 95.5 | -0.3 |
| fririlen      | 95.5 | 95.9 | -0.4 |
| fupieus       | 92.6 | 92.6 | 0    |
| gadatast      | 97.8 | 96.8 | 1    |
| ganriteur     | 95   | 91.8 | 3.2  |
| gavimaal      | 90.2 | 92.3 | -2.1 |
| gebantie      | 91.3 | 95.4 | -4.1 |
| gebecht       | 93.5 | 91.1 | 2.4  |
| gebruursheerd | 93.6 | 94.6 | -1   |
| geelkebigen   | 97.8 | 97.1 | 0.7  |
| gekraad       | 92.5 | 90.9 | 1.6  |
| gelamersine   | 91.2 | 93.8 | -2.6 |
| geloorderaad  | 90.6 | 93.5 | -2.9 |
| gemaaf        | 95.3 | 96.9 | -1.6 |
| gemoeitoedig  | 97.2 | 97.7 | -0.5 |
| geneetgemdel  | 97.2 | 97.6 | -0.4 |
| gepoping      | 92.4 | 96.3 | -3.9 |
| gepromen      | 96.5 | 96.1 | 0.4  |
| gerbongen     | 96.7 | 96.2 | 0.4  |
| gerdel        | 91.6 | 92.3 | -0.7 |
| gerschuikele  | 97.5 | 97.3 | 0.2  |
| gersovelaar   | 95.2 | 97.8 | -2.5 |
| gerstordig    | 95.6 | 95.3 | 0.3  |
| gertiesterers | 96.7 | 96.7 | 0.1  |
| gerulbel      | 95.9 | 96.4 | -0.5 |
| gescheuste    | 93.9 | 90.8 | 3.1  |
| geschiend     | 93.5 | 92.3 | 1.2  |
| gesigaraseerd | 94   | 92.8 | 1.2  |
| gespenken     | 93.1 | 90.9 | 2.3  |
| gestensen     | 93.5 | 94.3 | -0.7 |
| getwijnel     | 90.8 | 94.2 | -3.4 |
| geuist        | 97.6 | 94.7 | 2.9  |
| gevina        | 93.6 | 96.8 | -3.2 |
| geweintedis   | 97   | 97.2 | -0.2 |
| gezerpen      | 90.4 | 94.2 | -3.8 |
| gigkruchtig   | 95.3 | 97.8 | -2.4 |
| glappelig     | 95   | 92.5 | 2.4  |
| glarsuis      | 95.5 | 97.7 | -2.2 |
| glippant      | 90.1 | 94.7 | -4.6 |
| glistelijk    | 93.3 | 95.9 | -2.6 |
| grammooien    | 95   | 95.4 | -0.4 |
| grink         | 90.6 | 90.8 | -0.1 |
| groeking      | 96.5 | 94.2 | 2.2  |
| gruleristisch | 93   | 95.1 | -2.2 |
| guitak        | 93.3 | 93.7 | -0.4 |

|               |      |      |      |
|---------------|------|------|------|
| gulptig       | 91.6 | 96.5 | -4.9 |
| gussiraal     | 92   | 96.5 | -4.5 |
| haispisse     | 97.4 | 97.3 | 0.1  |
| halboeglijk   | 92   | 94.7 | -2.7 |
| halgepollig   | 96   | 97   | -1   |
| halnomen      | 91.6 | 93.5 | -1.9 |
| hekatie       | 92.3 | 91.4 | 0.9  |
| heltelijk     | 94.1 | 95.5 | -1.4 |
| hentin        | 95.4 | 96.6 | -1.2 |
| hepeloos      | 97.1 | 94   | 3    |
| herklefel     | 96   | 97.2 | -1.2 |
| hermeerleter  | 97.3 | 97.7 | -0.4 |
| hetetiekorps  | 92   | 92.2 | -0.2 |
| heunel        | 91.8 | 93.1 | -1.3 |
| himpig        | 90.7 | 96.4 | -5.7 |
| hokelal       | 97.6 | 96.3 | 1.3  |
| holalen       | 95.5 | 96.3 | -0.8 |
| horicijn      | 90.9 | 94.3 | -3.3 |
| horps         | 91.8 | 96.7 | -4.9 |
| hutaar        | 92.5 | 97.4 | -4.9 |
| iddimeren     | 94.1 | 95.4 | -1.2 |
| ijfling       | 90.4 | 90.3 | 0.1  |
| iklap         | 97.9 | 97.1 | 0.8  |
| imbing        | 97.6 | 95.5 | 2.1  |
| immagaal      | 91   | 90.2 | 0.8  |
| inbricetie    | 90   | 92.5 | -2.5 |
| indokstatetie | 94.4 | 94.2 | 0.2  |
| infilrie      | 95   | 93.6 | 1.4  |
| infost        | 90.3 | 96.5 | -6.2 |
| inkichtig     | 94.6 | 96.3 | -1.7 |
| inkouken      | 97.2 | 97.8 | -0.6 |
| inonfie       | 92.6 | 96.2 | -3.6 |
| insloeding    | 95.7 | 94.1 | 1.5  |
| inspate       | 95.3 | 95.9 | -0.5 |
| instennaren   | 94.2 | 94.2 | 0    |
| intabavueel   | 97.1 | 96.5 | 0.6  |
| inteldaag     | 94.5 | 96.3 | -1.8 |
| intilm        | 96.7 | 97.2 | -0.5 |
| intotovitie   | 96   | 97.4 | -1.3 |
| intuileinend  | 95.6 | 96.6 | -1   |
| invensiptie   | 90   | 93   | -3   |
| invenstordig  | 96.6 | 96.4 | 0.2  |
| invisting     | 91.8 | 93.5 | -1.7 |
| invoekelijk   | 91.8 | 95   | -3.2 |
| inwartief     | 95.2 | 96.1 | -0.8 |
| iriel         | 92.7 | 90   | 2.7  |
| isenkatie     | 97.8 | 96.1 | 1.7  |
| jagogdictie   | 95.6 | 94   | 1.6  |
| jagradieel    | 95.6 | 92.2 | 3.4  |
| jamier        | 94.2 | 95.1 | -0.9 |
| jangerenkift  | 97.4 | 97.5 | -0.1 |
| jarloficaat   | 92.5 | 93.8 | -1.3 |
| joddegrok     | 95.1 | 95.7 | -0.6 |



|                |      |      |      |
|----------------|------|------|------|
| jomisch        | 91   | 95.1 | -4.1 |
| jontast        | 97.2 | 96.4 | 0.8  |
| judrulant      | 92.5 | 94.8 | -2.2 |
| kadelziek      | 90.9 | 95.8 | -4.8 |
| kalbelade      | 93.3 | 94.9 | -1.6 |
| kalzelen       | 91.8 | 95.2 | -3.4 |
| kangegen       | 97.5 | 97.2 | 0.3  |
| kardidieus     | 90.7 | 92.4 | -1.7 |
| kavree         | 93.4 | 96.8 | -3.5 |
| kegemant       | 96.1 | 95   | 1.2  |
| kienelig       | 93.1 | 92.8 | 0.4  |
| kieneling      | 92.1 | 91.9 | 0.2  |
| kienstbaal     | 93.3 | 95.3 | -2   |
| kigneneris     | 97.2 | 97.6 | -0.4 |
| kiksel         | 92   | 93.8 | -1.8 |
| killamolatie   | 90.3 | 95   | -4.7 |
| kirgedier      | 95.9 | 94.3 | 1.6  |
| klampigaaal    | 92.6 | 93.5 | -0.9 |
| klergte        | 95   | 97.4 | -2.4 |
| knam           | 96.4 | 97.4 | -0.9 |
| koddenhoor     | 96.9 | 96.1 | 0.7  |
| koefmobberij   | 95.9 | 97.8 | -1.9 |
| koermink       | 91.8 | 93.7 | -1.9 |
| kojoluut       | 93.5 | 94.7 | -1.2 |
| konbijleut     | 97.7 | 97.6 | 0.1  |
| kondlerstig    | 97.9 | 97.3 | 0.6  |
| kondreiten     | 93   | 92.6 | 0.4  |
| konnelig       | 92.5 | 93.9 | -1.5 |
| korculien      | 94.4 | 95.4 | -1   |
| korket         | 91.6 | 93.8 | -2.1 |
| kosenteur      | 96.2 | 96.4 | -0.2 |
| kotaal         | 92.7 | 93.7 | -1   |
| kovetie        | 92.7 | 94.4 | -1.6 |
| krachteteel    | 91.9 | 92.2 | -0.3 |
| krepadetie     | 92.4 | 95.1 | -2.8 |
| krocuraas      | 96.1 | 97.3 | -1.2 |
| kroden         | 92.5 | 92.8 | -0.3 |
| kroren         | 96.1 | 97.3 | -1.2 |
| krussig        | 92.9 | 92.6 | 0.3  |
| kwetelijk      | 91.8 | 91.6 | 0.1  |
| lagelen        | 94.5 | 91.9 | 2.6  |
| legroperiseren | 93.3 | 93.8 | -0.5 |
| lekinklijk     | 97   | 97   | 0    |
| lepenuit       | 94.7 | 96.2 | -1.6 |
| lepeven        | 97.3 | 97.1 | 0.1  |
| lestrundie     | 95.6 | 96   | -0.4 |
| liepenpasier   | 97   | 97.3 | -0.3 |
| ligittie       | 92.3 | 96.4 | -4.1 |
| lilikent       | 97.2 | 96.6 | 0.6  |
| lioleit        | 92.8 | 94.6 | -1.9 |
| lirultief      | 91.5 | 93.1 | -1.6 |
| loerna         | 96.2 | 96.4 | -0.2 |
| lolict         | 96.4 | 95.9 | 0.6  |

|              |      |      |      |
|--------------|------|------|------|
| lomguasief   | 94.6 | 96.7 | -2.1 |
| lorfararen   | 97.1 | 97.8 | -0.7 |
| lozeraal     | 92.6 | 94.6 | -2   |
| lulstbandig  | 93.1 | 97.2 | -4   |
| lurdig       | 92.8 | 94.1 | -1.3 |
| maarmarstig  | 91.5 | 93.6 | -2   |
| mabikaal     | 90.7 | 96.3 | -5.6 |
| mamiergrem   | 97.8 | 97.7 | 0.1  |
| mandon       | 90.2 | 91.9 | -1.7 |
| mandvarrijd  | 97   | 97.7 | -0.7 |
| maneetdoen   | 97.9 | 97.7 | 0.1  |
| manijn       | 91.7 | 96   | -4.4 |
| mardon       | 92.8 | 95.5 | -2.7 |
| marsens      | 93.8 | 94.7 | -0.9 |
| mazein       | 93.4 | 93.4 | 0.1  |
| medormap     | 91.5 | 95.1 | -3.5 |
| mempen       | 93.4 | 92.7 | 0.8  |
| menlariteit  | 95.3 | 95.2 | 0    |
| mentekid     | 97.1 | 97.4 | -0.3 |
| mererist     | 91.9 | 90.6 | 1.3  |
| merraguur    | 94.3 | 95.6 | -1.3 |
| messtaad     | 92.1 | 94.1 | -2   |
| miakinaal    | 91.9 | 93.8 | -1.9 |
| mialaltiek   | 92   | 95.5 | -3.5 |
| michten      | 93.9 | 93.9 | 0    |
| miklenatisch | 96   | 95.8 | 0.2  |
| mipel        | 92.6 | 95.2 | -2.6 |
| mobbijn      | 95.8 | 95.5 | 0.3  |
| moetel       | 96.5 | 93.4 | 3.1  |
| momelons     | 97.2 | 97.6 | -0.4 |
| mopcurm      | 97   | 97.6 | -0.6 |
| mosimaal     | 94.1 | 93.2 | 0.9  |
| muikdelijk   | 96.4 | 96.9 | -0.6 |
| mukiek       | 96.6 | 96.9 | -0.3 |
| mupline      | 93.2 | 96.3 | -3.1 |
| muzegen      | 94.3 | 95.7 | -1.4 |
| nacef        | 97.4 | 97.1 | 0.4  |
| nachteraan   | 91.5 | 94.3 | -2.8 |
| namerijn     | 93.6 | 94.8 | -1.2 |
| naromender   | 94   | 94.5 | -0.5 |
| nartelijk    | 91.7 | 97.6 | -5.9 |
| natcoom      | 97.2 | 97   | 0.2  |
| navanning    | 95.5 | 97.7 | -2.2 |
| neekrag      | 97.1 | 97.4 | -0.3 |
| neharber     | 97.5 | 97.7 | -0.1 |
| nekeven      | 97.4 | 96.3 | 1.1  |
| nemenraal    | 96   | 93.2 | 2.8  |
| nenteking    | 97.7 | 97.7 | 0    |
| neuroek      | 95.6 | 97.6 | -2   |
| nidasteren   | 91.4 | 95.2 | -3.8 |
| nokaar       | 92.7 | 92.9 | -0.2 |
| obbeshegt    | 97.6 | 96.7 | 0.9  |
| odenhuiten   | 97.5 | 97   | 0.5  |

|                |      |      |      |
|----------------|------|------|------|
| odenwuitang    | 97.4 | 97.8 | -0.4 |
| oehamen        | 96.1 | 96.6 | -0.5 |
| ofslijikbaar   | 95.9 | 97   | -1.1 |
| okstobutie     | 95.6 | 96.5 | -0.9 |
| olbangs        | 96.7 | 97.5 | -0.8 |
| olletude       | 93.6 | 96.4 | -2.9 |
| olwafolisch    | 95   | 97.3 | -2.3 |
| ompuchtbaar    | 91.6 | 94.7 | -3   |
| omvaan         | 94.4 | 93.5 | 0.9  |
| omvarvoren     | 97   | 97.3 | -0.2 |
| omvoelaan      | 96.1 | 97.6 | -1.6 |
| ongertief      | 95.8 | 93.8 | 1.9  |
| onlongellijk   | 95.1 | 96.7 | -1.6 |
| onnerwande     | 95.6 | 95.5 | 0.1  |
| onrolen        | 94.2 | 94.4 | -0.2 |
| onstronen      | 94.8 | 95.3 | -0.5 |
| onterweven     | 94.1 | 93.4 | 0.8  |
| onterziemen    | 96.4 | 95.2 | 1.1  |
| ontlertenen    | 97.7 | 97.6 | 0    |
| ontzuppen      | 92.3 | 94.2 | -1.9 |
| onverschremen  | 94.8 | 94.4 | 0.5  |
| onvogger       | 96.3 | 97   | -0.7 |
| oordiet        | 90.8 | 90.2 | 0.6  |
| opana          | 94.1 | 93.9 | 0.2  |
| opbino         | 97.7 | 97.9 | -0.2 |
| opgakerij      | 93.3 | 95.9 | -2.6 |
| opongelen      | 91.8 | 94.6 | -2.8 |
| oppebeuglijk   | 96.3 | 94.3 | 2    |
| opprinee       | 93.5 | 95.8 | -2.3 |
| oppumaren      | 95.5 | 95.3 | 0.3  |
| oranfafeet     | 94.4 | 97.7 | -3.3 |
| osmeling       | 95.3 | 95.4 | 0    |
| ospassedeur    | 96.7 | 95.4 | 1.4  |
| ostemarkt      | 91.8 | 93.1 | -1.3 |
| otij           | 94.1 | 95.9 | -1.8 |
| otlikisme      | 92.2 | 94.9 | -2.7 |
| ouwacieten     | 94.9 | 96.6 | -1.7 |
| overmifis      | 97.7 | 97.8 | -0.1 |
| padelstiten    | 97.1 | 96.8 | 0.2  |
| pamend         | 90.6 | 93.2 | -2.5 |
| pammerd        | 94.7 | 93.9 | 0.7  |
| papijl         | 94.4 | 93.1 | 1.2  |
| paud           | 97.4 | 97.8 | -0.4 |
| peject         | 94.1 | 96.6 | -2.5 |
| pensiet        | 92.1 | 90.6 | 1.5  |
| pideletuur     | 92.4 | 93.3 | -0.9 |
| pigiek         | 93.1 | 94.9 | -1.8 |
| pigulder       | 97.3 | 97.6 | -0.3 |
| pihengiaat     | 93.7 | 97.3 | -3.6 |
| pijtens        | 96.3 | 94.7 | 1.7  |
| pinterlaarlijk | 91.8 | 95.9 | -4.1 |
| plaricaat      | 91.4 | 90.7 | 0.7  |
| plisterig      | 92.5 | 92.3 | 0.2  |

|                   |      |      |      |
|-------------------|------|------|------|
| pluwelaan         | 92.4 | 93.2 | -0.8 |
| poenbouber        | 97.1 | 97.3 | -0.1 |
| pokenin           | 94.2 | 96.7 | -2.5 |
| pondoes           | 90   | 90.1 | -0.2 |
| pongeloos         | 90.3 | 95.6 | -5.3 |
| porkon            | 95.3 | 96   | -0.7 |
| poventig          | 94.5 | 94.6 | -0.1 |
| prenilaren        | 90.7 | 93.8 | -3.1 |
| pretebentie       | 90   | 96.4 | -6.4 |
| pribuur           | 96.1 | 97.2 | -1   |
| prikezie          | 92.2 | 93.5 | -1.3 |
| prodoet           | 97   | 96.4 | 0.6  |
| progeceteur       | 93.2 | 92.6 | 0.6  |
| propikkeron       | 93   | 95.3 | -2.3 |
| protridenade      | 91.2 | 91.8 | -0.6 |
| pulstueel         | 90.1 | 91.6 | -1.5 |
| puvide            | 90.1 | 91.9 | -1.8 |
| rakwan            | 93.6 | 95.8 | -2.2 |
| rallibule         | 90.5 | 92.7 | -2.2 |
| ralm              | 90.1 | 91.1 | -1   |
| ramarij           | 93   | 95.1 | -2.2 |
| ramenin           | 94.9 | 94.6 | 0.3  |
| ramfe             | 97.5 | 97.7 | -0.2 |
| rebrijk           | 94.4 | 97.3 | -2.9 |
| reddine           | 91.8 | 95.4 | -3.6 |
| rehotoren         | 95.2 | 94.5 | 0.7  |
| rereditie         | 95.7 | 95.2 | 0.5  |
| restuinesswaardig | 94.5 | 91.8 | 2.7  |
| reuperd           | 91.2 | 92.2 | -1   |
| revost            | 93   | 95   | -2   |
| riepoedig         | 94.6 | 95.7 | -1.1 |
| rilomode          | 92.9 | 96.6 | -3.7 |
| riodist           | 90.9 | 93.1 | -2.2 |
| roebiel           | 93.4 | 96.2 | -2.8 |
| roefdra           | 95.4 | 97.4 | -2   |
| roetorre          | 95.8 | 96.9 | -1.1 |
| rolk              | 91.6 | 95.1 | -3.5 |
| rolpstarrig       | 95.2 | 94.3 | 1    |
| roortrig          | 95.9 | 96.4 | -0.5 |
| rordoyant         | 94.4 | 95.2 | -0.8 |
| rorio             | 96.7 | 96.4 | 0.3  |
| ruimkreging       | 94.8 | 93.9 | 0.9  |
| rummij            | 96.9 | 96.9 | 0    |
| schepting         | 96.4 | 96.2 | 0.2  |
| sches             | 97.1 | 95.6 | 1.6  |
| schesks           | 97.1 | 97.1 | 0    |
| schesser          | 95.1 | 96.9 | -1.8 |
| schieluin         | 93.6 | 90.2 | 3.4  |
| schijgste         | 96.8 | 97   | -0.2 |
| schobbalen        | 91.6 | 92   | -0.4 |
| schobeting        | 93.8 | 97.1 | -3.4 |
| schokeldijn       | 92.1 | 96.6 | -4.5 |
| scholotisch       | 92.7 | 93.1 | -0.4 |

|              |      |      |      |
|--------------|------|------|------|
| schossig     | 91.1 | 91.5 | -0.4 |
| schroezer    | 90.6 | 94.3 | -3.7 |
| scruputoel   | 96.3 | 95.9 | 0.4  |
| sefpor       | 97.3 | 97.8 | -0.5 |
| sietsel      | 95.2 | 93.7 | 1.4  |
| sinuragen    | 94.6 | 94.9 | -0.4 |
| slaarmekker  | 94.5 | 97.1 | -2.6 |
| slaarpol     | 96.4 | 97.7 | -1.4 |
| slanspalent  | 95.7 | 96.8 | -1.1 |
| slapioloog   | 94   | 91.5 | 2.5  |
| smakteel     | 93.3 | 95.4 | -2.1 |
| smapmatisch  | 95.4 | 95.8 | -0.3 |
| smoebaan     | 96   | 96.5 | -0.6 |
| snemmer      | 96.3 | 96.8 | -0.6 |
| sonspring    | 92.8 | 92.3 | 0.4  |
| soorteraan   | 94.8 | 93.6 | 1.2  |
| sormies      | 90.9 | 96.2 | -5.2 |
| soscaal      | 95   | 96.8 | -1.8 |
| speesing     | 95.7 | 93.6 | 2.1  |
| spipper      | 96   | 96.2 | -0.2 |
| splimpen     | 91.8 | 94   | -2.2 |
| sprans       | 94.3 | 91.5 | 2.8  |
| spropen      | 95   | 97.4 | -2.4 |
| spropend     | 95.2 | 93.8 | 1.4  |
| spruichen    | 96.1 | 94.3 | 1.8  |
| stadderaar   | 91.4 | 93.6 | -2.2 |
| stakrast     | 92.3 | 91.7 | 0.6  |
| staliem      | 94.9 | 94.4 | 0.6  |
| stessig      | 90.4 | 93.3 | -2.9 |
| steupem      | 96.1 | 96.3 | -0.1 |
| stiellij     | 91.8 | 94.4 | -2.6 |
| strissen     | 90.5 | 92.9 | -2.4 |
| strokon      | 94.7 | 94.1 | 0.6  |
| stroon       | 91   | 91.5 | -0.5 |
| studiediet   | 91.7 | 93.3 | -1.5 |
| tadeboe      | 97.7 | 96.5 | 1.3  |
| tagisor      | 95.6 | 96.1 | -0.6 |
| taslon       | 91.7 | 94.5 | -2.8 |
| tecastentie  | 93   | 91.8 | 1.2  |
| tederieden   | 95.2 | 95.7 | -0.5 |
| telbioen     | 95.7 | 94.8 | 0.9  |
| temifrase    | 90.4 | 90.1 | 0.3  |
| teramikratie | 90   | 91.6 | -1.5 |
| theoraak     | 93   | 90.4 | 2.6  |
| tibbegen     | 95.9 | 97   | -1.1 |
| tidrolen     | 95.4 | 96.9 | -1.5 |
| tienenis     | 97.8 | 97.3 | 0.6  |
| tijmant      | 94.3 | 96.7 | -2.4 |
| tijvinigheid | 91   | 95.4 | -4.3 |
| tinpeloos    | 92.1 | 94.2 | -2.1 |
| toeptelig    | 96.9 | 96.4 | 0.5  |
| tokedoni     | 96.8 | 97.5 | -0.7 |
| topelig      | 92   | 93.4 | -1.5 |

|               |      |      |      |
|---------------|------|------|------|
| torgegraads   | 96.6 | 96.3 | 0.2  |
| toteateur     | 97   | 97.8 | -0.8 |
| traar         | 94   | 94   | 0.1  |
| tralaan       | 91.6 | 92.1 | -0.4 |
| trandellien   | 91.5 | 95.7 | -4.3 |
| trarrofoon    | 90.9 | 94.9 | -4   |
| traten        | 93.7 | 93.8 | -0.1 |
| trekkaat      | 91.8 | 92.8 | -0.9 |
| tretting      | 92.4 | 92.6 | -0.2 |
| trewen        | 95.4 | 96.5 | -1.1 |
| trirvioen     | 92.4 | 95.2 | -2.8 |
| tronstijn     | 96   | 96.2 | -0.1 |
| truma         | 94.1 | 94.8 | -0.7 |
| tups          | 91.2 | 91.8 | -0.6 |
| tweelerkjus   | 97.1 | 97.3 | -0.2 |
| twikkig       | 92.4 | 91   | 1.4  |
| uitklesting   | 93.3 | 94.8 | -1.5 |
| uitklorsel    | 95   | 96.3 | -1.4 |
| uitwok        | 91.2 | 91.6 | -0.4 |
| ukeef         | 97.3 | 97.4 | -0.1 |
| umotoren      | 90.3 | 92.8 | -2.5 |
| vaatstonzel   | 90.1 | 93.7 | -3.6 |
| valdrongen    | 91.3 | 94.2 | -2.9 |
| valtewas      | 96.4 | 97.1 | -0.7 |
| vebeerder     | 96   | 96.9 | -0.9 |
| vebierding    | 96.2 | 95.5 | 0.7  |
| vecindeerd    | 94.1 | 93.4 | 0.7  |
| vedalen       | 95.2 | 94.3 | 0.9  |
| vegachtspunt  | 96.1 | 96.3 | -0.2 |
| veheitend     | 96.9 | 96.4 | 0.5  |
| vehoutelt     | 97.3 | 97.7 | -0.4 |
| vejaarlenhaad | 97.4 | 97.6 | -0.2 |
| vekeeuwen     | 96.9 | 97.9 | -1   |
| veleet        | 93.6 | 94.7 | -1.1 |
| vemechten     | 95.9 | 95.6 | 0.3  |
| vemekken      | 93.7 | 95   | -1.3 |
| venterm       | 92.3 | 93.9 | -1.6 |
| veoorlinaar   | 94.8 | 97.7 | -2.8 |
| veraand       | 92.7 | 92.8 | -0.1 |
| verbrelen     | 91.6 | 91.7 | 0    |
| verdaspen     | 92   | 95   | -3   |
| vereberen     | 93.3 | 93.2 | 0.1  |
| vereberend    | 92.3 | 94.9 | -2.6 |
| vereuben      | 95.4 | 97.7 | -2.3 |
| verisserig    | 93.2 | 97.8 | -4.6 |
| verneertezen  | 97.4 | 97.8 | -0.3 |
| verroppend    | 95   | 90.1 | 5    |
| versaander    | 95.3 | 95.9 | -0.6 |
| verspreigen   | 93.3 | 94.5 | -1.2 |
| vervarden     | 91.7 | 93.3 | -1.6 |
| vervarding    | 90.9 | 93.7 | -2.8 |
| verwolper     | 91.9 | 95   | -3.1 |
| vescheligd    | 95.7 | 95.5 | 0.3  |

|              |      |      |      |
|--------------|------|------|------|
| vescheming   | 94.2 | 96.7 | -2.5 |
| veschogbaar  | 96.1 | 96.3 | -0.3 |
| veschosten   | 97.6 | 97   | 0.5  |
| veschosting  | 95.9 | 93.4 | 2.5  |
| veslammen    | 96.1 | 96.9 | -0.8 |
| vetactisch   | 91.5 | 92.5 | -1   |
| vetadiel     | 94.8 | 93   | 1.8  |
| veteggelijk  | 94.7 | 97.1 | -2.4 |
| vetichten    | 95.8 | 94.6 | 1.2  |
| vewoeg       | 96   | 97.1 | -1.1 |
| vezaren      | 93.3 | 94.5 | -1.2 |
| vezeid       | 97.1 | 97.8 | -0.6 |
| vezerting    | 93   | 95.7 | -2.7 |
| viarageren   | 90.5 | 92.6 | -2.1 |
| vinneljaart  | 96.1 | 97.9 | -1.8 |
| viriowaald   | 95.8 | 96.4 | -0.6 |
| virtieel     | 93.3 | 93.7 | -0.4 |
| vivoel       | 94.1 | 94.2 | -0.1 |
| vlum         | 92   | 94.8 | -2.8 |
| voeping      | 97.6 | 96.5 | 1.1  |
| voeriek      | 96.4 | 94.3 | 2.1  |
| vollundig    | 94.4 | 92.5 | 1.8  |
| volstutig    | 92.8 | 92.4 | 0.4  |
| vontjat      | 97.6 | 97.8 | -0.2 |
| vorris       | 92.9 | 95.9 | -3   |
| vory         | 97.2 | 97.4 | -0.1 |
| voseraar     | 92   | 92.9 | -0.9 |
| vrallen      | 97.4 | 97   | 0.4  |
| vrebaal      | 95.2 | 95.9 | -0.7 |
| vrijslerieus | 97.4 | 97.6 | -0.2 |
| vrijvopig    | 97.1 | 97   | 0.1  |
| vrunteling   | 93.2 | 96.8 | -3.6 |
| waanderijks  | 92.2 | 93.6 | -1.4 |
| waarbij      | 93.9 | 97.2 | -3.3 |
| wacromeren   | 94.1 | 94   | 0.1  |
| wadeborker   | 97.7 | 96.8 | 0.9  |
| wanmentine   | 94.6 | 96.2 | -1.6 |
| wanositie    | 95.6 | 96.5 | -0.9 |
| warmunetie   | 92.9 | 94.1 | -1.2 |
| warralist    | 92.8 | 96.1 | -3.3 |
| waspografie  | 90.6 | 92.8 | -2.3 |
| wedrokoom    | 95.7 | 97.5 | -1.8 |
| weelslaad    | 96.9 | 96.8 | 0    |
| welsilaat    | 94.6 | 96.6 | -2   |
| werium       | 92.2 | 94.1 | -2   |
| wijpeloegen  | 97.2 | 97.3 | -0.1 |
| wimming      | 94.5 | 95.4 | -0.8 |
| wingstondig  | 93   | 91.6 | 1.4  |
| wrijmeraar   | 93.3 | 97   | -3.7 |
| wutlen       | 97.2 | 97.5 | -0.3 |
| zetidisch    | 91.8 | 93.9 | -2.1 |
| zijketig     | 94.5 | 92.5 | 2    |
| zossue       | 97.1 | 97.8 | -0.7 |

|              |      |      |      |
|--------------|------|------|------|
| zuimnatuatie | 95.4 | 97.7 | -2.2 |
| zuitend      | 91.8 | 93   | -1.3 |

---

## 2. Peabody picture vocabulary test

Example trial:

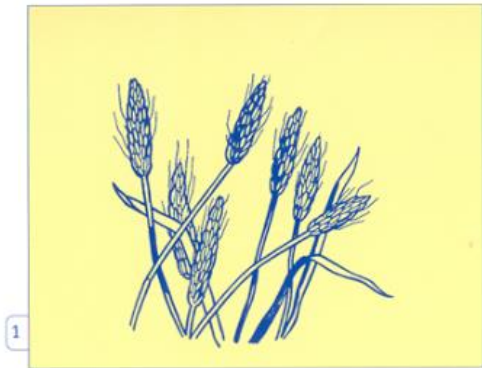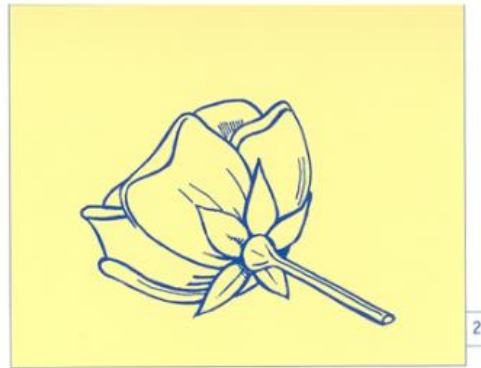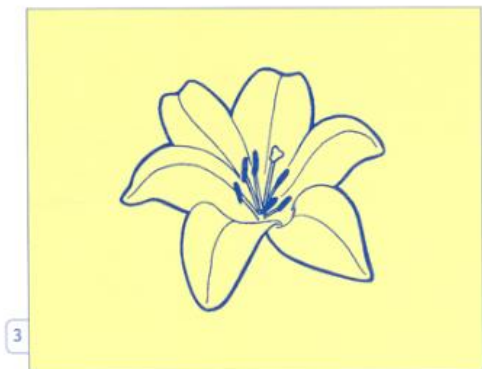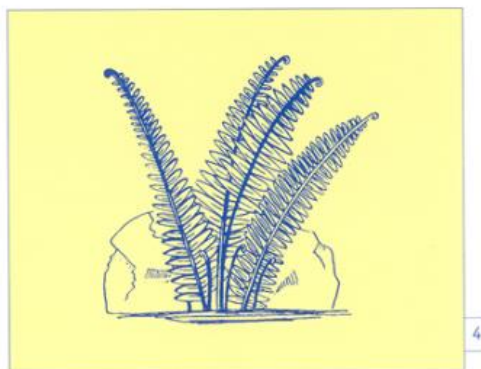

“Druk op spatie om het woord te horen. Klik op het plaatje dat bij het woord hoort.”  
(Press the spacebar to hear the word. Click on the picture associated with the word.)

Audio: “Meeldraad” (stamen)



### 3. Spelling test

| Word                                | Correctness | Correct spelling | Category                 | ZipF | Prevalence |
|-------------------------------------|-------------|------------------|--------------------------|------|------------|
| kauwgom (chewing gum)               | correct     | -                | au/ou                    | 3.99 | 0.99       |
| akkoord (agreement/accord)          | correct     | -                | c/k + letter doubling    | 2.43 | 1.00       |
| februari (February)                 | correct     | -                | capital + end-i          | 3.78 | 1.00       |
| geliefkoosd (carressed)             | correct     | -                | d/t                      | 1.7  | 0.95       |
| litteken (scar)                     | correct     | -                | d/t                      | 3.26 | 0.99       |
| dreumes (toddler)                   | correct     | -                | e/u                      | 2.51 | 0.99       |
| allerlei (all kinds of)             | correct     | -                | ei/ij                    | 2.36 | 1.00       |
| refrein (chorus)                    | correct     | -                | ei/ij                    | 3.06 | 0.99       |
| eindhalte (final stop)              | correct     | -                | ei/ij + d/t              | 2.26 | 0.99       |
| discipline (discipline)             | correct     | -                | knowledge                | 3.92 | 1.00       |
| feliciteren (congratulate)          | correct     | -                | knowledge                | 3.82 | 1.00       |
| hypnose (hypnosis)                  | correct     | -                | knowledge                | 3.42 | 0.99       |
| interview (interview)               | correct     | -                | knowledge                | 4.22 | 0.99       |
| jaloerie (jealousy)                 | correct     | -                | knowledge                | 3.78 | 1.00       |
| pyjama (pajamas)                    | correct     | -                | knowledge                | 3.77 | 0.99       |
| succes (success)                    | correct     | -                | knowledge                | 5.02 | 1.00       |
| ananas (pineapple)                  | correct     | -                | letter doubling          | 3.4  | 0.99       |
| apparaat (device)                   | correct     | -                | letter doubling          | 4.25 | 0.99       |
| initiatief (initiative)             | correct     | -                | letter doubling          | 3.68 | 1.00       |
| kannibaal (cannibal)                | correct     | -                | letter doubling          | 3.01 | 1.00       |
| ontplooiing (unfoldment)            | correct     | -                | letter doubling          | 1.95 | n/a        |
| onverbiddelijk (inexorable)         | correct     | -                | letter doubling          | 2.48 | 0.99       |
| personage (character)               | correct     | -                | letter doubling          | 3.86 | 1.00       |
| hondenhok (doghouse)                | correct     | -                | n                        | 2.89 | 1.00       |
| papegaai (parrot)                   | correct     | -                | n                        | 3.52 | 0.99       |
| bacteriën (bacteria)                | correct     | -                | plural-ie/trema          | 3.58 | 0.98       |
| hoofdstad (capital)                 | correct     | -                | silent letter + within-s | 3.81 | 1.00       |
| afkickcentrum (rehab center)        | correct     | -                | single word              | 1.85 | -          |
| blindedarmontsteking (appendicitis) | correct     | -                | single word              | 2.43 | -          |
| sympathie (sympathy)                | correct     | -                | t/th                     | 2.04 | 1.00       |
| ternouwernood (narrowly)            | incorrect   | ternauwernood    | au/ou                    | 2.57 | 0.99       |
| reklame (advertisement)             | incorrect   | reclame          | c/k                      | 4.11 | 1.00       |
| gefotokopieërd (photocopied)        | incorrect   | gefotokopieerd   | c/k + trema              | 1.7  | n/a        |
| neerwaards (down)                   | incorrect   | neerwaarts       | d/t                      | 3.77 | 0.99       |
| onbemint (unloved)                  | incorrect   | onbemind         | d/t                      | 2.2  | 0.99       |
| stiekum (secretly)                  | incorrect   | stiekem          | e/u                      | 4.07 | 0.99       |
| chagerijnig (grumpy)                | incorrect   | chagrijnig       | ei/ij                    | 3.54 | 0.96       |
| mislijdend (misleading)             | incorrect   | misleidend       | ei/ij                    | 3.01 | 1.00       |
| porselijn (china)                   | incorrect   | porselein        | ei/ij                    | 3.26 | 1.00       |

|                                     |           |                |                     |      |      |
|-------------------------------------|-----------|----------------|---------------------|------|------|
| alinia (paragraph)                  | incorrect | alinea         | i/e                 | 2.72 | 0.99 |
| joghurt (yogurt)                    | incorrect | yoghurt        | knowledge           | 3.33 | 1.00 |
| licensie (license)                  | incorrect | licentie       | knowledge           | 3.19 | 0.99 |
| nivo (level)                        | incorrect | niveau         | knowledge           | 4.4  | 1    |
| sollisiteren (apply)                | incorrect | solliciteren   | knowledge           | 3.35 | 1    |
| spagetti (spaghetti)                | incorrect | spaghetti      | knowledge           | 3.83 | 0.99 |
| aggressie (aggression)              | incorrect | agressie       | letter doubling     | 3.7  | 0.99 |
| anuleren (cancel)                   | incorrect | annuleren      | letter doubling     | 3.54 | 0.99 |
| brocoli (broccoli)                  | incorrect | broccoli       | letter doubling     | 4.28 | 0.99 |
| diaree (diarrhea)                   | incorrect | diarree        | letter doubling     | 3.6  | 0.99 |
| onmiddelijk (immediately)           | incorrect | onmiddellijk   | letter doubling     | 4.69 | 0.99 |
| sinasappelsap (orange juice)        | incorrect | sinaasappelsap | letter doubling     | 3.43 | 0.98 |
| slimmerikken (geniuses)             | incorrect | slimmeriken    | letter doubling     | 4.37 | n/a  |
| eigelijk (actually)                 | incorrect | eigenlijk      | n                   | 5.49 | 1    |
| waardenloos (worthless)             | incorrect | waardeloos     | n                   | 4.4  | 1    |
| caloriën (calories)                 | incorrect | calorieën      | plural-ie/trema     | 3.06 | 1    |
| tennister ((female) tennis player)  | incorrect | tennisster     | s + letter doubling | 1.95 | n/a  |
| muzeum (museum)                     | incorrect | museum         | s/z                 | 4.55 | 1    |
| lage drukgebied (low pressure area) | incorrect | lagedrukgebied | single word         | 2.43 | n/a  |
| vantevoren (in advance)             | incorrect | van tevoren    | single word         | -    | n/a  |
| autentiek (authentic)               | incorrect | authentiek     | t/th                | 2.97 | 1    |

*Note:* ZipF = Zipf frequency.

#### 4. Author recognition test

| <b>Name</b>                      | <b>Code</b> | <b>Difficulty</b> | <b>Item.Tot.woi</b> | <b>Item.Rel.woi</b> | <b>Discrim</b> |
|----------------------------------|-------------|-------------------|---------------------|---------------------|----------------|
| AFT <sup>h</sup> Van der Heijden | AUT         | 0.28              | 0.57                | 0.26                | 0.59           |
| Agatha Christie                  | AUT         | 0.78              | 0.21                | 0.09                | 0.32           |
| Anne Provoost                    | AUT         | 0.6               | 0.34                | 0.17                | 0.53           |
| Annet de Jong                    | AUT         | 0.1               | 0.46                | 0.14                | 0.24           |
| Annie MG Schmidt                 | AUT         | 0.83              | 0.36                | 0.14                | 0.36           |
| Arnon Grunberg                   | AUT         | 0.38              | 0.53                | 0.26                | 0.59           |
| Astrid Lindgren                  | AUT         | 0.42              | 0.51                | 0.25                | 0.67           |
| Bart Moeyaert                    | AUT         | 0.66              | 0.37                | 0.17                | 0.52           |
| Bertolt Brecht                   | AUT         | 0.42              | 0.25                | 0.12                | 0.32           |
| Carlos Ruiz Zafón                | AUT         | 0.2               | 0.45                | 0.18                | 0.39           |
| Cees Nooteboom                   | AUT         | 0.3               | 0.6                 | 0.27                | 0.58           |
| Charles Baudelaire               | AUT         | 0.39              | 0.39                | 0.19                | 0.53           |
| Connie Palmen                    | AUT         | 0.19              | 0.53                | 0.21                | 0.42           |
| Dan Brown                        | AUT         | 0.78              | 0.4                 | 0.17                | 0.5            |
| Daniel Mason                     | AUT         | 0.15              | 0.58                | 0.21                | 0.38           |
| Dante Alighieri                  | AUT         | 0.24              | 0.45                | 0.19                | 0.42           |
| David Baldacci                   | AUT         | 0.2               | 0.6                 | 0.24                | 0.47           |
| David Grossman                   | AUT         | 0.17              | 0.6                 | 0.22                | 0.39           |
| Dimitri Verhulst                 | AUT         | 0.76              | 0.33                | 0.14                | 0.38           |
| Donna Tartt                      | AUT         | 0.21              | 0.46                | 0.18                | 0.39           |
| Elizabeth George                 | AUT         | 0.23              | 0.54                | 0.23                | 0.47           |
| Emily Brontë                     | AUT         | 0.41              | 0.49                | 0.24                | 0.59           |
| Fay Weldon                       | AUT         | 0.1               | 0.58                | 0.17                | 0.27           |
| Gabriel Garcia Márquez           | AUT         | 0.44              | 0.39                | 0.19                | 0.52           |
| George Eliot                     | AUT         | 0.4               | 0.55                | 0.27                | 0.68           |
| Georges Simenon                  | AUT         | 0.15              | 0.46                | 0.16                | 0.33           |
| Guy de Maupassant                | AUT         | 0.3               | 0.48                | 0.22                | 0.47           |
| Harper Lee                       | AUT         | 0.24              | 0.44                | 0.19                | 0.44           |
| Harry Mulisch                    | AUT         | 0.52              | 0.38                | 0.19                | 0.48           |
| Helen Fitzgerald                 | AUT         | 0.39              | 0.52                | 0.25                | 0.64           |
| Henning Mankell                  | AUT         | 0.15              | 0.45                | 0.16                | 0.3            |
| Herman Brusselmans               | AUT         | 0.9               | 0.16                | 0.05                | 0.09           |
| Herman Koch                      | AUT         | 0.43              | 0.59                | 0.29                | 0.7            |
| Hermann Hesse                    | AUT         | 0.23              | 0.52                | 0.22                | 0.48           |
| Hubert Lampo                     | AUT         | 0.22              | 0.55                | 0.23                | 0.45           |
| Isabel Allende                   | AUT         | 0.22              | 0.54                | 0.22                | 0.45           |
| James Patterson                  | AUT         | 0.32              | 0.42                | 0.2                 | 0.44           |
| Jane Austen                      | AUT         | 0.61              | 0.36                | 0.17                | 0.45           |
| JD Salinger                      | AUT         | 0.31              | 0.44                | 0.2                 | 0.45           |
| Jean M Auel                      | AUT         | 0.21              | 0.49                | 0.2                 | 0.44           |
| JJ Voskuil                       | AUT         | 0.2               | 0.55                | 0.22                | 0.48           |

|                      |     |      |      |      |      |
|----------------------|-----|------|------|------|------|
| JK Rowling           | AUT | 0.94 | 0.21 | 0.05 | 0.12 |
| JM Coetzee           | AUT | 0.28 | 0.41 | 0.18 | 0.45 |
| John Grisham         | AUT | 0.3  | 0.47 | 0.21 | 0.47 |
| John le Carré        | AUT | 0.16 | 0.56 | 0.2  | 0.42 |
| Joris van Casteren   | AUT | 0.12 | 0.57 | 0.18 | 0.32 |
| JRR Tolkien          | AUT | 0.69 | 0.29 | 0.13 | 0.47 |
| Kader Abdolah        | AUT | 0.2  | 0.58 | 0.23 | 0.5  |
| Karin Slaughter      | AUT | 0.33 | 0.4  | 0.19 | 0.45 |
| Khaled Hosseini      | AUT | 0.49 | 0.3  | 0.15 | 0.47 |
| Kristien Hemmerechts | AUT | 0.42 | 0.44 | 0.22 | 0.5  |
| Lulu Wang            | AUT | 0.23 | 0.46 | 0.19 | 0.41 |
| Manon Uphoff         | AUT | 0.12 | 0.61 | 0.2  | 0.32 |
| Marc De Bel          | AUT | 0.94 | 0.19 | 0.04 | 0.09 |
| Margaret Atwood      | AUT | 0.3  | 0.59 | 0.27 | 0.65 |
| Marianne Fredriksson | AUT | 0.16 | 0.47 | 0.17 | 0.36 |
| Mario Vargas Llosa   | AUT | 0.12 | 0.5  | 0.16 | 0.33 |
| Marion Pauw          | AUT | 0.12 | 0.55 | 0.18 | 0.29 |
| Mark Twain           | AUT | 0.42 | 0.47 | 0.23 | 0.55 |
| Michael Connelly     | AUT | 0.21 | 0.57 | 0.23 | 0.5  |
| Miguel de Cervantes  | AUT | 0.35 | 0.53 | 0.25 | 0.59 |
| Milan Kundera        | AUT | 0.21 | 0.44 | 0.18 | 0.38 |
| Nicci French         | AUT | 0.6  | 0.29 | 0.14 | 0.33 |
| Patricia Cornwell    | AUT | 0.41 | 0.49 | 0.24 | 0.58 |
| Per Olov Enquist     | AUT | 0.1  | 0.51 | 0.15 | 0.26 |
| PF Thomése           | AUT | 0.13 | 0.67 | 0.22 | 0.36 |
| Pieter Aspe          | AUT | 0.92 | 0.2  | 0.05 | 0.12 |
| Ray Bradbury         | AUT | 0.1  | 0.52 | 0.16 | 0.27 |
| Raymond Chandler     | AUT | 0.18 | 0.51 | 0.2  | 0.39 |
| Roald Dahl           | AUT | 0.83 | 0.2  | 0.07 | 0.23 |
| Roberto Bolaño       | AUT | 0.08 | 0.51 | 0.14 | 0.23 |
| Ruth Rendell         | AUT | 0.21 | 0.64 | 0.26 | 0.53 |
| Saskia De Coster     | AUT | 0.26 | 0.42 | 0.19 | 0.41 |
| Simone van der Vlugt | AUT | 0.23 | 0.49 | 0.2  | 0.48 |
| Stefan Zweig         | AUT | 0.13 | 0.62 | 0.21 | 0.35 |
| Stephen King         | AUT | 0.79 | 0.23 | 0.09 | 0.27 |
| Stieg Larsson        | AUT | 0.51 | 0.47 | 0.24 | 0.71 |
| Sue Grafton          | AUT | 0.12 | 0.55 | 0.17 | 0.32 |
| Susan Smit           | AUT | 0.33 | 0.42 | 0.2  | 0.48 |
| TC Boyle             | AUT | 0.29 | 0.6  | 0.27 | 0.61 |
| Thea Beckman         | AUT | 0.56 | 0.36 | 0.18 | 0.53 |
| Tim Krabbé           | AUT | 0.37 | 0.33 | 0.16 | 0.39 |
| Tom Clancy           | AUT | 0.25 | 0.45 | 0.19 | 0.44 |
| Tom Lanoye           | AUT | 0.81 | 0.24 | 0.09 | 0.27 |
| Toni Morrison        | AUT | 0.18 | 0.45 | 0.17 | 0.38 |

|                         |     |      |      |      |      |
|-------------------------|-----|------|------|------|------|
| Umberto Eco             | AUT | 0.32 | 0.42 | 0.2  | 0.56 |
| Uwe Tellkamp            | AUT | 0.13 | 0.41 | 0.14 | 0.26 |
| Virginia Woolf          | AUT | 0.32 | 0.42 | 0.2  | 0.5  |
| Vladimir Nabokov        | AUT | 0.29 | 0.55 | 0.25 | 0.55 |
| Willem Frederik Hermans | AUT | 0.27 | 0.46 | 0.2  | 0.41 |
| Andrée Oudin            | NON | 0.14 | 0.62 | 0.21 | 0.36 |
| Chiara Ricci            | NON | 0.16 | 0.44 | 0.16 | 0.33 |
| E Buxton                | NON | 0.08 | 0.3  | 0.08 | 0.17 |
| EL Wilford              | NON | 0.16 | 0.51 | 0.19 | 0.3  |
| Elizabeth Wigelsworth   | NON | 0.14 | 0.45 | 0.15 | 0.29 |
| Emily Oldani            | NON | 0.08 | 0.58 | 0.16 | 0.24 |
| Emmanuelle Duvernay     | NON | 0.08 | 0.56 | 0.15 | 0.23 |
| Eric Ferey              | NON | 0.1  | 0.56 | 0.17 | 0.27 |
| Georges Roudaut         | NON | 0.09 | 0.5  | 0.14 | 0.24 |
| Hans Ulfsson            | NON | 0.11 | 0.53 | 0.16 | 0.24 |
| Hendrik van Weenen      | NON | 0.11 | 0.58 | 0.18 | 0.3  |
| HM van der Grinten      | NON | 0.15 | 0.53 | 0.19 | 0.35 |
| Jane Jessup             | NON | 0.06 | 0.37 | 0.09 | 0.17 |
| John Kestley            | NON | 0.13 | 0.49 | 0.16 | 0.3  |
| John Punnett            | NON | 0.13 | 0.51 | 0.17 | 0.32 |
| Jorge Eudoro Remache    | NON | 0.04 | 0.24 | 0.05 | 0.12 |
| Judith L Schecter       | NON | 0.11 | 0.57 | 0.18 | 0.26 |
| Kathryn Lightner        | NON | 0.1  | 0.52 | 0.15 | 0.26 |
| Kelly Weaver            | NON | 0.1  | 0.53 | 0.16 | 0.24 |
| Ketil Christoffersen    | NON | 0.09 | 0.48 | 0.14 | 0.26 |
| Kim Wassing             | NON | 0.03 | 0.24 | 0.04 | 0.06 |
| Konstantin Ryschkov     | NON | 0.14 | 0.52 | 0.18 | 0.33 |
| Kyra Appels             | NON | 0.08 | 0.45 | 0.12 | 0.23 |
| Ludwig Lorenz           | NON | 0.13 | 0.46 | 0.15 | 0.27 |
| Mahmoud Abdellah        | NON | 0.21 | 0.45 | 0.18 | 0.36 |
| Marcus Fernandes        | NON | 0.14 | 0.48 | 0.16 | 0.33 |
| Mark Robin              | NON | 0.11 | 0.55 | 0.17 | 0.27 |
| Martijn van der Worp    | NON | 0.12 | 0.59 | 0.19 | 0.32 |
| Mathijs L van Bueren    | NON | 0.1  | 0.35 | 0.1  | 0.23 |
| Melanie Marrero Morales | NON | 0.13 | 0.51 | 0.17 | 0.33 |
| Pablo Daniel Gonzalez   | NON | 0.15 | 0.45 | 0.16 | 0.33 |
| Pim Duijster            | NON | 0.1  | 0.51 | 0.15 | 0.23 |
| Richard Grigley         | NON | 0.1  | 0.49 | 0.15 | 0.24 |
| Robert Teesdale         | NON | 0.09 | 0.37 | 0.1  | 0.2  |
| Roberto Borsani         | NON | 0.12 | 0.51 | 0.16 | 0.29 |
| Roy Leeman              | NON | 0.14 | 0.44 | 0.15 | 0.26 |
| Sara Lakin              | NON | 0.1  | 0.5  | 0.15 | 0.27 |
| Theresa Ziegler         | NON | 0.18 | 0.44 | 0.17 | 0.3  |
| Tim Singler             | NON | 0.13 | 0.65 | 0.22 | 0.36 |

|                   |     |      |      |      |      |
|-------------------|-----|------|------|------|------|
| Tomas Arensman    | NON | 0.05 | 0.37 | 0.08 | 0.12 |
| Yasushi Sugawara  | NON | 0.1  | 0.6  | 0.18 | 0.29 |
| Zofia Kwiatkowski | NON | 0.1  | 0.49 | 0.15 | 0.23 |

*Note:* Item.Tot.woi = correlation of item with total test score; Item.Rel.woi = item reliability index; Discrim = discrimination.

## 5. Idiom recognition test

### 1. Tussen de regels door lezen (de diepere betekenis opmerken) (EN: read between the lines)

|                                   |                               |
|-----------------------------------|-------------------------------|
| lezen terwijl je iets anders doet | iets oppervlakkig lezen       |
| iets niet begrijpen               | de diepere betekenis opmerken |

### 2. Iemand iets in de maag splitsen (iemand iets dwingen te doen) (EN: force someone to do something)

|                                   |                             |
|-----------------------------------|-----------------------------|
| iemand iets te eten geven         | iemand iets dwingen te doen |
| iemand ergens de schuld van geven | iemand met iets helpen      |

### 3. Een slag om de arm houden (iets onder voorbehoud afspreken) (EN: conditionally agree on something)

|                                 |                              |
|---------------------------------|------------------------------|
| iets onder voorbehoud afspreken | iets voor iemand willen doen |
| iets zonder afspraak uitvoeren  | iets zonder beloning doen    |

### 4. Een gat in de lucht springen (heel blij zijn) (EN: to be very happy)

|                |                  |
|----------------|------------------|
| gevaar lopen   | voorzichtig zijn |
| heel blij zijn | bezorgd zijn     |

### 5. Iets uit je duim zuigen (iets verzinnen) (EN: to make something up)

|                 |                       |
|-----------------|-----------------------|
| iets verzinnen  | iets vergeten         |
| iets verstoppen | iets heel goed kennen |

### 6. Van zijn stokje gaan (flauwvallen) (EN: to faint)

|             |               |
|-------------|---------------|
| verhuizen   | naar bed gaan |
| flauwvallen | leef hebben   |

**7. Het schip ingaan (verliezen)**  
(EN: to lose)

|                 |            |
|-----------------|------------|
| trouwen         | verliezen  |
| zich verstoppen | gek worden |

**8. Iemand in de kaart spelen (iemand onbedoeld helpen)**  
(EN: to help someone unintentionally)

|                         |                              |
|-------------------------|------------------------------|
| iemand onbedoeld helpen | iemand onbedoeld tegenwerken |
| met iemand samenwerken  | met iemand ruzie hebben      |

**9. Iets onder de knie hebben (iets goed kunnen)**  
(EN: to be good at something)

|                       |                    |
|-----------------------|--------------------|
| op iets kunnen zitten | iets vergeten zijn |
| iets niet willen doen | iets goed kunnen   |

**10. Tegen de lamp lopen (betrappt worden)**  
(EN: to get caught)

|                    |                 |
|--------------------|-----------------|
| snel beledigd zijn | betrappt worden |
| ergens mee stoppen | geslagen worden |



## 6. Prescriptive grammar test

(green = Correct, red = incorrect)

| Sentence                                                                                                                          | Correctness | Correct word | Category |
|-----------------------------------------------------------------------------------------------------------------------------------|-------------|--------------|----------|
| De koekjes zijn even lekker <b>als</b> de taart van gisteren<br>(The cookies taste just as good as the cake yesterday)            | correct     | als          | als/dan  |
| Mijn broer is een jongen <b>die</b> altijd veel vriendinnen heeft<br>(My brother is a guy who always has a lot of girlfriends)    | correct     | die          | die/dat  |
| Er werd breed <b>geglimlacht</b> op de familiefoto<br>(There were broad smiles on the family photo)                               | correct     | geglimlacht  | spelling |
| Jij bent veel beter dan <b>mij</b> in het bedenken van oplossingen<br>(You are much better than me in coming up with solutions)   | incorrect   | ik           | mij/ik   |
| Misschien willen <b>hun</b> even alleen zijn<br>(Maybe they just want to be alone)                                                | incorrect   | zij          | hun/zij  |
| Daan is even geschikt <b>als</b> Sanne voor die functie<br>(Daan is as suitable as Sanne for that position)                       | correct     | als          | als/dan  |
| Ik heb twee keer zo veel boeken <b>als</b> mijn broer<br>(I have twice as many books as my brother)                               | correct     | als          | als/dan  |
| Suriname is vier keer zo groot <b>als</b> Nederland<br>(Suriname is four times the size of the Netherlands)                       | correct     | als          | als/dan  |
| Waarom werkt Jan even hard <b>als</b> Gert aan de opdracht?<br>(Why does Jan work as hard as Gert on the assignment?)             | correct     | als          | als/dan  |
| De jongen eet veel minder <b>als</b> zijn grote neef<br>(The boy eats much less than his big cousin)                              | incorrect   | dan          | als/dan  |
| Een dokter verdient meer <b>als</b> een ervaren timmerman<br>(A doctor earns more than an experienced carpenter)                  | incorrect   | dan          | als/dan  |
| Niets is mooier <b>als</b> een zonsondergang op het strand<br>(Nothing is more beautiful than a sunset on the beach)              | incorrect   | dan          | als/dan  |
| Waarom werken zij sneller <b>als</b> de andere ploeg?<br>(Why do they work faster than the other team?)                           | incorrect   | dan          | als/dan  |
| Ik praat met een vrouw <b>die</b> een rode jurk draagt<br>(I talk to a woman who is wearing a red dress)                          | correct     | die          | die/dat  |
| In haar kamer staat een foto <b>die</b> ik nog nooit gezien heb<br>(There is a picture in her room that I have never seen before) | correct     | die          | die/dat  |
| Piet werkt in een kledingwinkel <b>die</b> ik te duur vind<br>(Piet works in a clothing store that is too expensive I think)      | correct     | die          | die/dat  |
| Wij wachten op een vriend <b>die</b> altijd laat is                                                                               | correct     | die          | die/dat  |

(We are waiting for a friend who is always late)

|                                                                                                                                                             |           |     |         |
|-------------------------------------------------------------------------------------------------------------------------------------------------------------|-----------|-----|---------|
| Daarachter ligt een gebied <b>die</b> de boer heeft opgekocht<br>(Behind it is an area that the farmer bought up)                                           | incorrect | dat | die/dat |
| Hij was niet blij met een filmpje <b>die</b> van hem was gemaakt<br>(He was not happy with the video that was about him)                                    | incorrect | dat | die/dat |
| Kim is in een vliegtuig gestapt <b>die</b> naar Londen gaat<br>(Kim boarded a plane that is going to London)                                                | incorrect | dat | die/dat |
| Vorige week heb ik een boek gelezen <b>die</b> net is uitgebracht<br>(Last week I read a book that has just been released)                                  | incorrect | dat | die/dat |
| Gisteravond heb ik <b>hun</b> gelukkig nieuwjaar gewenst<br>(Last night I wished them happy new year)                                                       | correct   | hun | hun/zij |
| Gisteren heb ik <b>hun</b> twee boeken gegeven<br>(Yesterday I gave them two books)                                                                         | correct   | hun | hun/zij |
| Misschien zitten die kleren <b>hun</b> niet lekker<br>(Maybe those clothes are not so comfortable to them)                                                  | correct   | hun | hun/zij |
| Morgen zullen we <b>hun</b> adviseren om de trein te nemen<br>(Tomorrow we will advise them to take the train)                                              | correct   | hun | hun/zij |
| Hopelijk gaan <b>hun</b> niet meer verhuizen<br>(Hopefully they will not move again)                                                                        | incorrect | zij | hun/zij |
| Samen hebben <b>hun</b> heel veel plezier<br>(Together they have a lot of fun)                                                                              | incorrect | zij | hun/zij |
| Vorige week liepen <b>hun</b> naar de speeltuin<br>(Last week they walked to the playground)                                                                | incorrect | zij | hun/zij |
| Waarom komen <b>hun</b> nu niet naar het feestje?<br>(Why are they not coming to the party?)                                                                | incorrect | zij | hun/zij |
| Hij kan Vera beter begrijpen dan <b>mij</b> omdat ze langzamer spreekt<br>(He can understand Vera better than he understands me, because she speaks slower) | correct   | mij | mij/ik  |
| Hij vindt Linda aardiger dan <b>mij</b> maar niet grappiger<br>(He likes Linda better than me but he doesn't think she is funnier)                          | correct   | mij | mij/ik  |
| Jullie hielpen Dirk net zo veel als <b>mij</b> met het huiswerk<br>(You helped Dirk as much as you helped me with homework)                                 | correct   | mij | mij/ik  |
| Kees belt Lotte vaker dan <b>mij</b> als hij iets nodig heeft<br>(Kees is calling Lotte more than he is calling me if he needs something)                   | correct   | mij | mij/ik  |
| Jij kunt hoger dan <b>mij</b> klimmen in deze boom<br>(You can climb higher in this tree than me)                                                           | incorrect | ik  | mij/ik  |
| Mijn collega gaat een week langer dan <b>mij</b> weg in de vakantie                                                                                         | incorrect | ik  | mij/ik  |

|                                                                                                                                              |           |                |          |
|----------------------------------------------------------------------------------------------------------------------------------------------|-----------|----------------|----------|
| (My colleague is one week longer on holiday than I am)                                                                                       |           |                |          |
| Mijn zus is niet zo handig als <b>mij</b> in dat soort dingen<br>(My sister is not as handy with that kind of things as I am)                | incorrect | ik             | mij/ik   |
| Steven heeft eerder dan <b>mij</b> zijn rijbewijs gehaald<br>(Steven got his driver's license before I did)                                  | incorrect | ik             | mij/ik   |
| Het kindje had koorts en <b>stuiptrekte</b> met zijn armen en benen<br>(The child had a fever and convulsed with his arms and legs)          | correct   | stuiptrekte    | spelling |
| In het café zat een man die tegen betaling <b>waarzegde</b><br>(There was a man in the cafe who told fortunes for a fee)                     | correct   | waarzegde      | spelling |
| Mijn vader heeft jaren <b>gezweefvliegd</b> bij een Friese club<br>(My father has been gliding for years at a Frisian club)                  | correct   | gezweefvliegd  | spelling |
| Thuis werd er voortdurend <b>gebekvecht</b> om de tablet<br>(At home there was constantly wrangling for the tablet)                          | correct   | gebekvecht     | spelling |
| De schoonmaakster <b>stofzoog</b> het hele huis grondig<br>(The cleaning woman vacuumed the entire house thoroughly)                         | incorrect | stofzuigde     | spelling |
| Het is bekend dat een arts in de middeleeuwen patiënten<br><b>aderlaatte</b><br>(It is known that a doctor in the Middle Ages bled patients) | incorrect | aderliet       | spelling |
| Ik bewonderde de figuren die uit marmer waren <b>beeldgehouden</b><br>(I admired the figures sculpted from marble)                           | incorrect | gebeeldhouwd   | spelling |
| Tessa had <b>schatergelachen</b> om de opmerking van haar vriendin<br>(Tessa had laughed at her friend's comment)                            | incorrect | geschaterlacht | spelling |

---

## 7. Syntest

Available upon request.

## **General cognitive skills**

### 8. Auditory simple reaction time test

Auditory stimulus: sine tone (550 Hz)

### 9. Auditory choice reaction time test

Auditory stimulus: low (300 Hz) or high sine tone (800 Hz)

### 10. Letter comparison test

| <b>Block</b> | <b>Condition</b> | <b>Top</b> | <b>Bottom</b> |
|--------------|------------------|------------|---------------|
| Practice     | same             | LVK        | LVK           |
| Practice     | same             | RWP        | RWP           |
| Practice     | same             | GTK        | GTK           |
| Practice     | different        | RDM        | RNM           |
| Practice     | different        | HSW        | HSF           |
| Practice     | different        | BKT        | BKJ           |
| 1            | same             | VMJ        | VMJ           |
| 1            | same             | TDL        | TDL           |
| 1            | same             | MWP        | MWP           |
| 1            | same             | TDM        | TDM           |
| 1            | same             | RNH        | RNH           |
| 1            | same             | FZT        | FZT           |
| 1            | same             | GTK        | GTK           |
| 1            | same             | KNV        | KNV           |
| 1            | same             | RWP        | RWP           |
| 1            | same             | BWS        | BWS           |
| 1            | same             | LVK        | LVK           |
| 1            | same             | RJN        | RJN           |
| 1            | different        | TZF        | TCF           |
| 1            | different        | DPG        | DWG           |
| 1            | different        | RDM        | RNM           |
| 1            | different        | KTG        | KTB           |
| 1            | different        | HSW        | HSF           |
| 1            | different        | ZKD        | NKD           |
| 1            | different        | FRW        | CRW           |
| 1            | different        | DWJ        | DHJ           |
| 1            | different        | BKT        | BKJ           |
| 1            | different        | WDN        | SDN           |

|   |           |        |        |
|---|-----------|--------|--------|
| 1 | different | THP    | DHP    |
| 1 | different | PBS    | PBD    |
| 2 | same      | BWSDNJ | BWSDNJ |
| 2 | same      | RJNTHP | RJNTHP |
| 2 | same      | GTKPBS | GTKPBS |
| 2 | same      | RWTDPG | RWTDPG |
| 2 | same      | MWPHSW | MWPHSW |
| 2 | same      | LVKWDN | LVKWDN |
| 2 | same      | FZTBKL | FZTBKL |
| 2 | same      | RNHKTG | RNHKTG |
| 2 | same      | TDLKZF | TDLKZF |
| 2 | same      | KNVRDM | KNVRDM |
| 2 | same      | TDMFRW | TDMFRW |
| 2 | same      | VMJZKD | VMJZKD |
| 2 | different | BKJFZT | BKVFZT |
| 2 | different | TCFBDL | TMFBDL |
| 2 | different | KTBRNH | KTFRNH |
| 2 | different | SPNTDM | SPNTDG |
| 2 | different | CRWVMJ | CRWVLJ |
| 2 | different | HSFMWP | HSFJWP |
| 2 | different | DWGRVP | KWGRVP |
| 2 | different | DHPRJN | DHPRJL |
| 2 | different | RNMKSV | GNMKSV |
| 2 | different | DHJBWS | DTJBWS |
| 2 | different | PBDGTK | PBDLTK |
| 2 | different | NKDLVK | NKDLPK |

*Note:* Top = letters at top of the screen; Bottom = letters at the bottom of the screen.

### 11. Visual simple reaction time test

Visual stimulus:

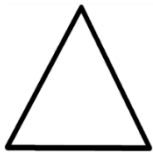

### 12. Visual choice reaction time test

Visual stimuli:

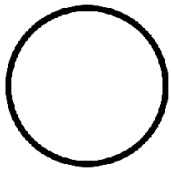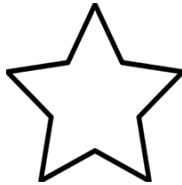

### 13. Digit span test (forward & backward)

*Digit span test forward*

| <b>Trial length</b> |                   |                   |
|---------------------|-------------------|-------------------|
| 2 digits            | 1-7               | 6-3               |
| 3 digits            | 5-8-2             | 6-9-4             |
| 4 digits            | 6-4-3-9           | 7-2-8-6           |
| 5 digits            | 4-2-7-3-1         | 7-5-8-3-6         |
| 6 digits            | 3-9-2-4-8-7       | 6-1-9-4-7-3       |
| 7 digits            | 4-1-7-9-3-8-6     | 5-9-1-7-4-2-8     |
| 8 digits            | 3-8-2-9-5-1-7-4   | 5-8-1-9-2-6-4-7   |
| 9 digits            | 2-7-5-8-6-2-5-8-4 | 7-1-3-9-4-2-5-6-8 |

*Digit span test backward*

| <b>Trial length</b> |                 |                 |
|---------------------|-----------------|-----------------|
| 2 digits            | 2-4             | 5-7             |
| 3 digits            | 4-1-5           | 6-2-9           |
| 4 digits            | 3-2-7-9         | 4-9-6-8         |
| 5 digits            | 1-5-2-8-6       | 6-1-8-4-3       |
| 6 digits            | 5-3-9-4-1-8     | 7-2-4-8-5-6     |
| 7 digits            | 4-7-3-9-1-2-8   | 8-1-2-9-3-6-5   |
| 8 digits            | 7-2-8-1-9-6-5-3 | 9-4-3-7-6-2-5-8 |

14. Corsi block clicking test (forward & backward)

Example trial (3 blocks):

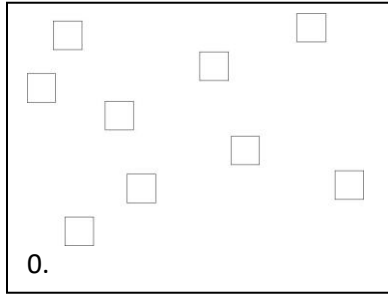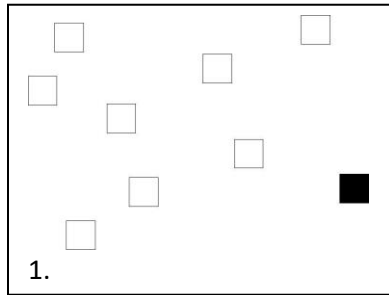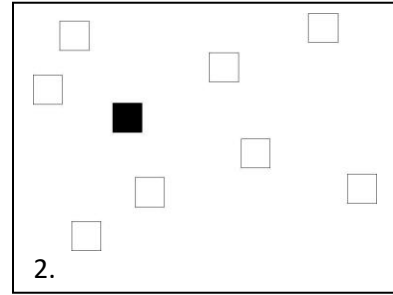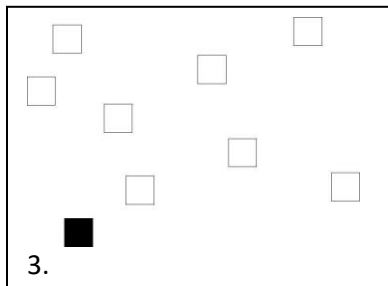

15. Eriksen flanker test

| <b>Condition</b> | <b>Stimulus</b> |
|------------------|-----------------|
| neutral          | --<--           |
| congruent        | <<<<<           |
| incongruent      | >><>            |

16. Antisaccade test

Fixation cross – Cue – Target - Mask



17. Raven's advanced progressive matrices test

Example trial:

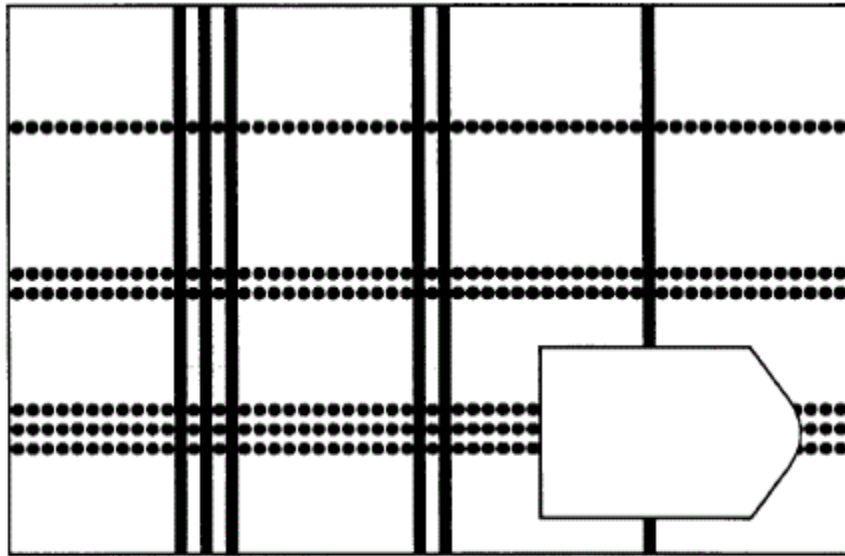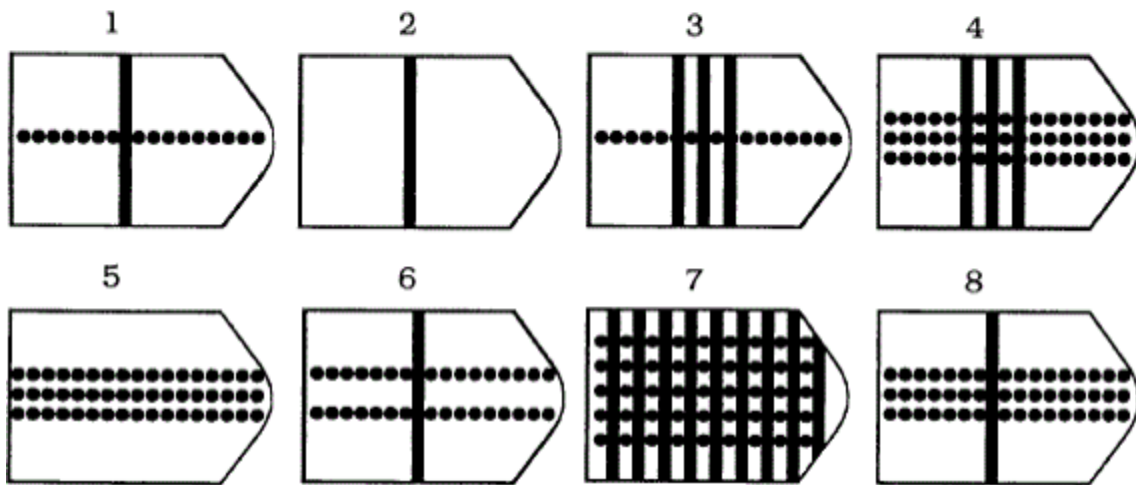

## Linguistic processing skills: Word production

### 18. Picture naming test

| <b>Target</b>                    | <b>Zipf Frequency</b> | <b>Prevalence</b> |
|----------------------------------|-----------------------|-------------------|
| kussen (pillow, practice)        | 4.66                  | 1.00              |
| lippenstift (lipstick, practice) | 3.81                  | 1.00              |
| schaats (skate, practice)        | 2.81                  | 1.00              |
| zebra (zebra, practice)          | 3.49                  | 1.00              |
| appel (apple)                    | 4.01                  | 1.00              |
| bureau (bureau)                  | 4.83                  | 0.99              |
| cactus (cactus)                  | 3.26                  | 0.99              |
| deur (door)                      | 5.39                  | 1.00              |
| egel (hedgehog)                  | 2.76                  | 1.00              |
| eiland (island)                  | 4.71                  | 1.00              |
| emmer (bucket)                   | 3.83                  | 1.00              |
| gieter (watering can)            | 2.51                  | 0.99              |
| glijbaan (slide)                 | 2.7                   | 1.00              |
| helm (helmet)                    | 4.04                  | 1.00              |
| jurk (dress)                     | 4.75                  | 1.00              |
| koffer (suitcase)                | 4.53                  | 1.00              |
| konijn (rabbit)                  | 4.28                  | 1.00              |
| kraan (tap)                      | 3.81                  | 1.00              |
| neus (nose)                      | 4.85                  | 1.00              |
| orka (orca)                      | 2.53                  | 0.99              |
| paspoort (passport)              | 4.27                  | 1.00              |
| passer (compasses)               | 2.04                  | 0.99              |
| pincet (tweezers)                | 2.95                  | 0.99              |
| pinguin (penguin)                | 3.39                  | 0.98              |
| punaise (pushpin)                | 2.26                  | 0.99              |
| raam (window)                    | 4.85                  | 1.00              |
| schaap (sheep)                   | 3.82                  | 1.00              |
| schoen (shoe)                    | 4.13                  | 0.99              |
| schommel (swing)                 | 3.2                   | 0.99              |
| sigaret (cigarette)              | 4.44                  | 1.00              |
| slang (snake)                    | 4.33                  | 1.00              |
| sleutel (key)                    | 4.91                  | 1.00              |
| snavel (beak)                    | 3.24                  | 1.00              |
| tafel (table)                    | 4.92                  | 1.00              |
| telefoon (telephone)             | 5.2                   | 1.00              |
| trommel (drum)                   | 3.27                  | 1.00              |
| varken (pig)                     | 4.39                  | 1.00              |
| vergiel (colander)               | 2.94                  | 1.00              |
| vleugel (wing)                   | 3.95                  | 0.99              |
| vogel (bird)                     | 4.51                  | 1.00              |
| vuist (fist)                     | 3.83                  | 1.00              |

|                 |      |      |
|-----------------|------|------|
| waaier (fan)    | 3.01 | 0.99 |
| wortel (carrot) | 3.79 | 1.00 |
| zeef (sieve)    | 2.76 | 1.00 |

### 19. Rapid automatized naming

| <b>Word</b>    | <b>Condition</b>          | <b>ZipF</b> | <b>PND</b> | <b>Prevalence</b> |
|----------------|---------------------------|-------------|------------|-------------------|
| bed (bed)      | high frequency - high PND | 5.38        | 38         | 1.00              |
| hoed (hat)     | high frequency - high PND | 4.56        | 31         | 1.00              |
| mond (mouth)   | high frequency - high PND | 5.22        | 20         | 1.00              |
| paard (horse)  | high frequency - high PND | 4.92        | 18         | 1.00              |
| tent (tent)    | high frequency - high PND | 4.61        | 20         | 1.00              |
| arm (arm)      | high frequency - low PND  | 4.9         | 7          | 1.00              |
| bank (couch)   | high frequency - low PND  | 4.96        | 12         | 1.00              |
| deur (door)    | high frequency - low PND  | 5.39        | 12         | 1.00              |
| glas (glass)   | high frequency - low PND  | 4.76        | 7          | 1.00              |
| trap (stairs)  | high frequency - low PND  | 4.72        | 10         | 1.00              |
| bijl (axe)     | low frequency - high PND  | 3.97        | 17         | 1.00              |
| boon (bean)    | low frequency - high PND  | 3.15        | 19         | 0.99              |
| mand (basket)  | low frequency - high PND  | 3.63        | 25         | 1.00              |
| pauw (peacock) | low frequency - high PND  | 2.98        | 25         | 1.00              |
| vaas (vase)    | low frequency - high PND  | 3.66        | 26         | 1.00              |
| dolk (dagger)  | low frequency - low PND   | 3.65        | 8          | 1.00              |
| hark (rake)    | low frequency - low PND   | 3.18        | 9          | 0.99              |
| mais (corn)    | low frequency - low PND   | 2.88        | 5          | 0.96              |
| slee (sled)    | low frequency - low PND   | 3.61        | 7          | 1.00              |
| wieg (cradle)  | low frequency - low PND   | 3.74        | 11         | 1.00              |

*Note:* ZipF = Zipf frequency; PND = phonological neighborhood density.

## 20. Antonym production

| Cue                        | ZipF | Prevalence | Target                    | ZipF | Prevalence | Alternative(s)                                               |
|----------------------------|------|------------|---------------------------|------|------------|--------------------------------------------------------------|
| dwerg (dwarf, practice)    | 3.95 | 1.00       | reus (giant)              | 3.87 | 1.00       |                                                              |
| vallen (fall, practice)    | 5.26 | 1.00       | opstaan (rise)            | 4.62 | 1.00       |                                                              |
| winst (gain, practice)     | 4.34 | 0.99       | verlies (loss)            | 4.69 | 1.00       |                                                              |
| absent (absent)            | 2.43 | 0.98       | present (present)         | 3.29 | 0.99       | aanwezig (present)                                           |
| bevestiging (confirmation) | 3.8  | 1.00       | ontkenning (denial)       | 3.47 | 1.00       |                                                              |
| deficientie (deficiency)   | -    | 0.87       | overdaad (excess)         | 2.7  | 1.00       | overschot, teveel (surplus, too much)                        |
| fluisteren (whisper)       | 3.65 | 1.00       | schreeuwen (scream)       | 4.47 | 1.00       | gillen, roepen (shout, yell)                                 |
| geforceerd (forced)        | 3.27 | 1.00       | vrijwillig (voluntary)    | 3.98 | 1.00       | dwangloos, natuurlijk (noncompulsory, naturally)             |
| goedkoop (cheap)           | 4.21 | 1.00       | duur (expensive)          | 4.54 | 1.00       |                                                              |
| lawaai (noise)             | 4.23 | 1.00       | stilte (silence)          | 4.58 | 1.00       | rust, rustig (quiet)                                         |
| legaal (legal)             | 4.07 | 1.00       | illegaal (illegal)        | 4.24 | 0.99       | verboden (forbidden)                                         |
| leugen (lie)               | 4.42 | 0.99       | waarheid (truth)          | 5.28 | 1.00       |                                                              |
| mager (skinny)             | 3.94 | 1.00       | dik (fat)                 | 4.63 | 1.00       | gezet (heavy)                                                |
| minimaal (minimal)         | 3.69 | 1.00       | maximaal (maximal)        | 3.73 | 1.00       |                                                              |
| monochroom (monochrome)    | -    | 0.91       | bont (coloured)           | 3.63 | 1.00       | polychroom, kleurrijk (polychrome, colourful)                |
| nadeel (disadvantage)      | 3.54 | 1.00       | voordeel (advantage)      | 4.32 | 1.00       |                                                              |
| negatief (negative)        | 4.16 | 1.00       | positief (positive)       | 4.17 | 1.00       |                                                              |
| officieus (unofficially)   | 2.95 | 0.97       | officieel (official)      | 4.44 | 0.99       |                                                              |
| ouderwets (old fashioned)  | 3.98 | 0.99       | modern (modern)           | 3.81 | 0.99       | eigentijds, hedendaags, geavanceerd (contemporary, advanced) |
| overwinning (victory)      | 4.36 | 1.00       | nederlaag (defeat)        | 3.62 | 1.00       | verlies (loss)                                               |
| passief (passive)          | 3.06 | 1.00       | actief (active)           | 3.99 | 1.00       |                                                              |
| succes (success)           | 5.02 | 1.00       | mislukking (failure)      | 3.71 | 0.99       | sof, flop, falen (fiasco, fail)                              |
| tanen (decrease)           | 1.7  | 0.87       | toenemen (increase)       | 3.14 | 1.00       | stijgen (rise)                                               |
| theoretisch (theoretical)  | 3.48 | 1.00       | praktisch (practical)     | 4.06 | 1.00       |                                                              |
| traag (slow)               | 3.99 | 1.00       | snel (fast)               | 5.67 | 1.00       | gauw, vlug (soon, quickly)                                   |
| unanimiteit (unanimity)    | -    | 0.85       | Onenigheid (disagreement) | 3.45 | 1.00       | verdeeldheid (dividedness)                                   |
| vijand (enemy)             | 4.78 | 0.99       | vriend (friend)           | 5.69 | 1.00       | bondgenoot (ally)                                            |
| zaaien (sow)               | 3.6  | 0.99       | oogsten (harvest)         | 3.64 | 1.00       |                                                              |

Note: ZipF = Zipf frequency.

## 21. Verbal fluency

### *Categories*

- 1) Animals
- 2) Food and drinks

### *Letters*

- 1) Letter M
- 2) Letter S

## 22. Maximal speech rate

Task: Recite the months of the year as quickly as possible with clear pronunciation.

### 23. One-minute-test

|             |             |              |                   |
|-------------|-------------|--------------|-------------------|
| waar        | zijpad      | priemen      | struikgewas       |
| kar         | inham       | getik        | speelvergunning   |
| been        | stoutheid   | oertijd      | hernieuwen        |
| min         | proefstuk   | aanplanten   | berging           |
| vos         | lapje       | slopen       | nanacht           |
| net         | doch        | vooruitduwen | uitspuwen         |
| bruin       | vegen       | steigeren    | herplaatsing      |
| hand        | koplamp     | opsparen     | onnozel           |
| morgen      | koelte      | handelaar    | medelid           |
| eten        | rekenen     | diamant      | zijrivier         |
| mak         | verdieping  | bezig        | vermindering      |
| voorbij     | geknoei     | hanger       | reling            |
| hamer       | genieten    | puree        | getuigschrift     |
| zieke       | paffen      | achting      | herkenning        |
| luilak      | warenhuis   | opspuiten    | overloodsen       |
| trekken     | aanzitten   | plaatsnemen  | bijeenkomst       |
| verlaten    | stelen      | navliegen    | tekortkoming      |
| verhuizen   | treurig     | messteek     | gelaatskleur      |
| worden      | voorstaan   | ontschieten  | beoefenaar        |
| dichten     | overlaten   | scheepgaan   | welsprekend       |
| uithuilen   | afwissen    | boerenwoning | verslagenheid     |
| kruid       | groeve      | begaafd      | ontraadselen      |
| grootmoeder | verdwijnen  | pijlsnel     | omslachtig        |
| roeping     | dichtwerpen | schouwing    | tijdsbepaling     |
| laan        | hozen       | schoenveter  | ontworstelen      |
| kruimel     | zorgvol     | kibbelen     | saluutschot       |
| heenlopen   | spiegelen   | schede       | wetsrol           |
| fietsbel    | stamtafel   | rotsvast     | oneffen           |
| schroeven   | houtvlot    | frommelen    | rubberaanplanting |

*English translation:*

|                 |                          |                    |                              |
|-----------------|--------------------------|--------------------|------------------------------|
| where/true      | side road                | to pierce          | shrubby                      |
| cart            | cove                     | ticking noise      | event licence                |
| leg             | audacity                 | prehistory         | to renew                     |
| wet nurse       | masterpiece              | to plant           | storage room                 |
| fox             | [little] patch           | to demolish        | late-night                   |
| net             | however                  | to push forward    | to spit out                  |
| brown           | to sweep                 | to prance          | reinsertion                  |
| hand            | headlight                | to save up         | empty-headed                 |
| morning         | coolness                 | merchant           | fellow member                |
| to eat          | to calculate             | diamond            | tributary                    |
| tame            | floor [of a building]    | busy               | reduction                    |
| past            | mess                     | pendant            | railing                      |
| hammer          | to enjoy                 | purée              | certificate                  |
| sick person     | to smoke                 | regards            | recognition                  |
| lazybones       | warehouse                | to spray           | to pilot [a ship to a place] |
| to pull         | to sit at                | to take a seat     | meeting                      |
| to leave        | to steal                 | to fly after       | shortcoming                  |
| to move out     | sad                      | knife stab         | complexion                   |
| to become       | to stand for             | to slip [a memory] | practitioner                 |
| to write poetry | to leave something       | to embark          | eloquent                     |
| to cry          | to wipe off              | farmhouse          | dismay                       |
| herb            | quarry                   | gifted             | to unravel                   |
| grandmother     | to disappear             | swift as an arrow  | cumbersome                   |
| calling         | to close off             | inspection         | time determination           |
| avenue          | to bail water out        | shoelace           | to break away from           |
| crumb           | caring                   | to bicker          | gun salute                   |
| to walk away    | to mirror                | sheath             | law scroll                   |
| bicycle bell    | table for regular guests | rock-solid         | uneven                       |
| to screw        | wooden raft              | to fumble          | rubber plantation            |

## 24. Klepel test

|             |             |              |                   |
|-------------|-------------|--------------|-------------------|
| taaf        | zapod       | briekem      | stroukgewep       |
| vas         | ijnhas      | gelup        | stoelvordanning   |
| deek        | stuikhaut   | oeltijk      | lerdieuwen        |
| nim         | truufstin   | aafplenton   | dergonk           |
| gol         | kepjo       | drepes       | nonochd           |
| vek         | roch        | keenautluwer | outpluwın         |
| fruim       | veben       | steiperan    | derkraatsong      |
| jund        | fiplemp     | ipsporel     | annasel           |
| nargel      | goelte      | hosdelaar    | sederab           |
| aven        | rapones     | fiamont      | vijruzier         |
| baf         | serdieving  | podig        | dervinseming      |
| noogsij     | teploei     | denger       | talung            |
| zaper       | megoezen    | butee        | gemuikschruft     |
| hiene       | zaffon      | ochtung      | zertonning        |
| duihas      | worenpuis   | okspuilon    | iverleetsel       |
| trinnen     | oonlittek   | klaanstemen  | nijaaltorst       |
| kerpanes    | stebun      | vodrienen    | gepaltnomeng      |
| retluiven   | treukel     | baffraas     | bolaatsvloeg      |
| lardon      | voogstaag   | intschuipen  | geoeteraan        |
| wochtel     | ogerjaken   | scheempaag   | berstrapind       |
| ounlouget   | ofwannin    | souwentonang | terstogenheis     |
| vreud       | groeza      | beguisd      | antpiedselen      |
| kraatduiper | berdwijmel  | wijlspok     | onvlachtig        |
| poebing     | pochtbersen | schieveng    | notsberapong      |
| laas        | wozen       | schautkeder  | ontmertselen      |
| steumel     | nargvop     | mokkelin     | taluukschet       |
| hootgepen   | spietelin   | scheke       | batskel           |
| liertvek    | kwilhogel   | dotshast     | inekken           |
| schruidel   | muigkrit    | kröbbelon    | nalleroonplinteng |



## Linguistic processing skills: Word comprehension

### 25. Monitoring in noise in lists

green = target; orange = foil

*Non-word monitoring in non-word lists*

| Round    | SNR | Condition     | Cue basis      | Cue    | Word1     | Word2    | Word3    | Word4    | Word5   | Word6   |
|----------|-----|---------------|----------------|--------|-----------|----------|----------|----------|---------|---------|
| Practice | -2  | target-only   | schaap (sheep) | schuip | kelf      | schuip   | bientjel | jirker   |         |         |
| Practice | -8  | target-absent | zak (bag)      | zas    | pieder    | krel     | ern      |          |         |         |
| Practice | -12 | foil-target   | hart (heart)   | hats   | traap     | halgherm | spaas    | hats     | baphies |         |
| 1        | -2  | target-only   | touwe (rope)   | tomp   | werrens   | knaf     | regni    | apveid   | tomp    | penk    |
| 1        | -4  | target-absent | tang (pliers)  | mang   | halktat   | wieel    | vreeuw   |          |         |         |
| 1        | -6  | target-only   | kroon (crown)  | broon  | nijmsaard | wulen    | pluif    | broon    | swi     |         |
| 1        | -8  | foil-target   | man (man)      | mas    | kieg      | guitel   | marralk  | mas      | res     |         |
| 1        | -10 | target-absent | eend (duck)    | oend   | fraal     | stoek    | raf      | noger    |         |         |
| 1        | -12 | foil-target   | taart (cake)   | taapt  | taafmong  | taapt    | sloog    | gies     |         |         |
| 1        | -14 | target-only   | kaars (candle) | kiers  | slon      | kiers    | waga     |          |         |         |
| 1        | -16 | target-absent | gat (hole)     | gar    | famker    | cigroon  | snaan    | vets     | rirte   |         |
| 1        | -18 | foil-target   | bom (bomb)     | bog    | bofreun   | bog      | zamp     |          |         |         |
| 1        | -20 | target-only   | haai (shark)   | hoei   | viet      | spunel   | hoei     | nielund  |         |         |
| 2        | -2  | foil-target   | band (tire)    | baxt   | wirums    | hesk     | bafruip  | pras     | baxt    | grulon  |
| 2        | -4  | target-only   | kruis (cross)  | fluis  | doon      | rades    | fluis    | eedond   | wemp    | goeling |
| 2        | -6  | foil-target   | hand (hand)    | haps   | harfbijg  | dreflier | worzel   | haps     | keeg    |         |
| 2        | -8  | target-absent | zwaan (swan)   | praan  | veg       | gebog    | siekoed  | fonguin  |         |         |
| 2        | -10 | target-only   | bloem (flower) | blijm  | roor      | anwoep   | blijm    | efschauk |         |         |
| 2        | -12 | target-only   | smaak (taste)  | smaaf  | gog       | smaaf    | kleis    |          |         |         |
| 2        | -14 | foil-target   | hoed (hat)     | hoem   | hoegpaat  | strieg   | hoem     | vleek    |         |         |
| 2        | -16 | target-only   | bier (beer)    | biem   | fots      | olgeer   | biem     | tijnkel  |         |         |
| 2        | -18 | target-absent | peen (carrot)  | peef   | zek       | kijns    | miel     | draxtor  | redel   | vrop    |
| 2        | -20 | foil-target   | bord (plate)   | bops   | bolgwap   | bops     | lank     |          |         |         |

|   |     |               |                 |       |          |           |        |         |          |        |
|---|-----|---------------|-----------------|-------|----------|-----------|--------|---------|----------|--------|
| 3 | -2  | target-absent | loep (look)     | luip  | baaf     | mefdel    | schuik |         |          |        |
| 3 | -4  | foil-target   | broer (brother) | broen | launning | broefnak  | pag    | broen   | akbuip   | rornas |
| 3 | -6  | target-absent | doek (cloth)    | deek  | oedbijp  | jor       | stunk  | burbijn |          |        |
| 3 | -8  | target-only   | muis (mouse)    | muin  | pran     | muin      | barp   | euzer   | schekder |        |
| 3 | -10 | foil-target   | hond (dog)      | hogt  | aafbag   | holmdrins | hogt   | toor    | goe      |        |
| 3 | -12 | target-absent | beest (beast)   | beept | luin     | spom      | zoeg   | kraaf   | roog     |        |
| 3 | -14 | target-absent | blaas (bladder) | draas | antveg   | wref      | jomel  | loor    | proos    |        |
| 3 | -16 | foil-target   | brood (bread)   | broog | dauk     | broopkimp | broog  | knekgel |          |        |
| 3 | -18 | target-only   | pop (doll)      | pos   | woetaug  | pos       | snerm  | goos    |          |        |
| 3 | -20 | target-absent | klad (draft)    | klag  | vuitlil  | laaps     | hook   | brelp   | raben    | otrong |

*Note:* SNR = Signal-to-noise ratio.

Word form monitoring in word lists

| Round    | SNR | Condition     | Cue                | Word1                    | Word2                     | Word3                      | Word4               | Word5                 | Word6                  |
|----------|-----|---------------|--------------------|--------------------------|---------------------------|----------------------------|---------------------|-----------------------|------------------------|
| Practice | 0   | target-only   | kers<br>(cherry)   | zebra<br>(zebra)         | kers<br>(cherry)          | zwembad<br>(swimming pool) | stap<br>(step)      |                       |                        |
| Practice | -6  | target-absent | hert<br>(deer)     | speld<br>(pin)           | dijk<br>(dike)            | lid<br>(member)            |                     |                       |                        |
| Practice | -10 | target-foil   | zalf<br>(ointment) | pomp<br>(pump)           | zandbak<br>(sandbox)      | hof<br>(court)             | zalf<br>(ointment)  | bosjes<br>(bushes)    |                        |
| 1        | 0   | target-only   | fiets<br>(bicycle) | ontbijt<br>(breakfast)   | bijbel<br>(Bible)         | strop<br>(noose)           | persoon<br>(person) | fiets<br>(bicycle)    | voorbeeld<br>(example) |
| 1        | -2  | target-absent | veer<br>(feather)  | geld<br>(money)          | oorlog<br>(war)           | slaap<br>(sleep)           |                     |                       |                        |
| 1        | -4  | target-only   | spook<br>(ghost)   | ruil<br>(exchange)       | vlecht<br>(braid)         | klomp<br>(clog)            | spook<br>(ghost)    | applaus<br>(applause) |                        |
| 1        | -6  | target-foil   | roos<br>(rose)     | bries<br>(breeze)        | veerman<br>(ferryman)     | roofdier<br>(predator)     | roos<br>(rose)      | klik<br>(click)       |                        |
| 1        | -8  | target-absent | roem<br>(fame)     | tulband<br>(turban)      | kalf<br>(calf)            | object<br>(object)         | steel<br>(stem)     |                       |                        |
| 1        | -10 | target-foil   | mouw<br>(sleeve)   | moutwijn<br>(malt wine)  | mouw<br>(sleeve)          | kamp<br>(camp)             | sigaar<br>(cigar)   |                       |                        |
| 1        | -12 | target-only   | stift<br>(marker)  | zondag<br>(Sunday)       | stift<br>(marker)         | tijd<br>(time)             |                     |                       |                        |
| 1        | -14 | target-absent | haas<br>(hare)     | pand<br>(house/property) | koffie<br>(coffee)        | scherv<br>(shard)          | regel<br>(rule)     | armoe<br>(poverty)    |                        |
| 1        | -16 | target-foil   | bus<br>(bus)       | burger<br>(burger)       | bus<br>(bus)              | wieg<br>(cradle)           |                     |                       |                        |
| 1        | -18 | target-only   | bijl<br>(axe)      | schildpad<br>(turtle)    | robot<br>(robot)          | bijl<br>(axe)              | gitaar<br>(guitar)  |                       |                        |
| 2        | 0   | target-foil   | sik<br>(goatee)    | piloot<br>(pilot)        | hal<br>(hall)             | signaal<br>(signal)        | ets<br>(etching)    | sik<br>(goatee)       | fortuin<br>(fortune)   |
| 2        | -2  | target-only   | moord<br>(murder)  | fluit<br>(flute)         | begrip<br>(understanding) | moord<br>(murder)          | aalmoes<br>(alms)   | veulen<br>(foal)      | sla<br>(lettuce)       |
| 2        | -4  | target-foil   | huis<br>(house)    | huidcel<br>(skin cell)   | vest<br>(vest)            | gebied<br>(area)           | huis<br>(house)     | kameel<br>(camel)     |                        |
| 2        | -6  | target-absent | uil<br>(owl)       | folder<br>(flyer)        | pil<br>(pill)             | lijn<br>(line)             | ballon<br>(balloon) |                       |                        |
| 2        | -8  | target-only   | been<br>(leg)      | feestdag<br>(holiday)    | merk<br>(brand)           | been<br>(leg)              | water<br>(water)    |                       |                        |
| 2        | -10 | target-only   | sjaal<br>(scarf)   | gewei<br>(antlers)       | sjaal<br>(scarf)          | proef<br>(test)            |                     |                       |                        |

|   |     |               |                    |                          |                               |                          |                         |                     |                   |
|---|-----|---------------|--------------------|--------------------------|-------------------------------|--------------------------|-------------------------|---------------------|-------------------|
| 2 | -12 | target-foil   | zon<br>(sun)       | zolder<br>(attic)        | moed<br>(courage)             | zon<br>(sun)             | bakker<br>(baker)       |                     |                   |
| 2 | -14 | target-only   | rok<br>(skirt)     | schip<br>(ship)          | waanzin<br>(madness)          | rok<br>(skirt)           | hertog<br>(duke)        |                     |                   |
| 2 | -16 | target-absent | bloed<br>(blood)   | lijm<br>(glue)           | kegel<br>(cone)               | zoon<br>(son)            | plaats<br>(place)       | viool<br>(violin)   | jager<br>(hunter) |
| 2 | -18 | target-foil   | jas<br>(coat)      | jargon<br>(jargon)       | jas<br>(coat)                 | print<br>(print)         |                         |                     |                   |
| 3 | 0   | target-absent | zorg<br>(care)     | naam<br>(name)           | sloep<br>(sloop)              | tempel<br>(temple)       |                         |                     |                   |
| 3 | -2  | target-foil   | blaar<br>(blister) | non<br>(nun)             | blaaspijp<br>(blowpipe)       | liter<br>(liter)         | blaar<br>(blister)      | tas<br>(bag)        | mis<br>(mass)     |
| 3 | -4  | target-absent | steeg<br>(alley)   | hoofdpijn<br>(head ache) | actie<br>(action)             | meter<br>(meter)         | gif<br>(poison)         |                     |                   |
| 3 | -6  | target-only   | baard<br>(beard)   | voedsel<br>(food)        | baard<br>(beard)              | gil<br>(scream)          | kramp<br>(cramp)        | zadel<br>(saddle)   |                   |
| 3 | -8  | target-foil   | hoef<br>(hoof)     | maandag<br>(Monday)      | hoektand<br>(canine)          | hoef<br>(hoof)           | zaal<br>(hall/room)     | worp<br>(throw)     |                   |
| 3 | -10 | target-absent | slak<br>(snail)    | figuur<br>(figure)       | halm<br>(grass stem)          | voorkeur<br>(preference) | toets<br>(test)         | kan<br>(can)        |                   |
| 3 | -12 | target-absent | kom<br>(bowl)      | buil<br>(bump)           | piraat<br>(pirate)            | aanpak<br>(approach)     | nicht<br>(cousin/niece) | film<br>(film)      |                   |
| 3 | -14 | target-foil   | oog<br>(eye)       | spoor<br>(trail)         | oostgrens<br>(eastern border) | oog<br>(eye)             | versie<br>(version)     |                     |                   |
| 3 | -16 | target-only   | spin<br>(spider)   | boog<br>(bow)            | spin<br>(spider)              | pleister<br>(band aid)   | tomaat<br>(tomato)      |                     |                   |
| 3 | -18 | target-absent | sop<br>(suds)      | kamer<br>(room)          | bles<br>(blaze)               | trots<br>(pride)         | ven<br>(fen)            | leraar<br>(teacher) | deksel<br>(lid)   |

Note: SNR = Signal-to-noise ratio.

Meaning monitoring in word lists

| Round    | SNR | Condition      | Cue               | Target            | Word1                    | Word2                       | Word3               | Word4               | Word5                  | Word6              |
|----------|-----|----------------|-------------------|-------------------|--------------------------|-----------------------------|---------------------|---------------------|------------------------|--------------------|
| Practice | -2  | target-present | wol<br>(wool)     | schaap<br>(sheep) | keus<br>(choice)         | schaap<br>(sheep)           | borstel<br>(brush)  | cirkel<br>(circle)  |                        |                    |
| Practice | -8  | target-absent  | tas<br>(bag)      | zak<br>(bag)      | gieter<br>(watering can) | stel<br>(couple)            | erf<br>(property)   |                     |                        |                    |
| Practice | -12 | target-present | long<br>(lung)    | hart<br>(heart)   | troep<br>(mess)          | kuiken<br>(chick)           | spies<br>(skewer)   | hart<br>(heart)     | badhuis<br>(bathhouse) |                    |
| 1        | -2  | target-present | knoop<br>(button) | touw<br>(rope)    | oordeel<br>(judgement)   | staf<br>(staff)             | rente<br>(interest) | arbeid<br>(work)    | touw<br>(rope)         | wenk<br>(hint)     |
| 1        | -4  | target-absent  | klem<br>(clip)    | tang<br>(pliers)  | hangmat<br>(hammock)     | riool<br>(sewer)            | sneeuw<br>(snow)    |                     |                        |                    |
| 1        | -6  | target-present | prins<br>(prince) | kroon<br>(crown)  | nijlpaard<br>(hippo)     | regen<br>(rain)             | druif<br>(grape)    | kroon<br>(crown)    | ski<br>(ski)           |                    |
| 1        | -8  | target-present | vrouw<br>(woman)  | man<br>(man)      | kier<br>(crack)          | beitel<br>(chisel)          | datum<br>(date)     | man<br>(man)        | ren<br>(run)           |                    |
| 1        | -10 | target-absent  | dons<br>(fluff)   | eend<br>(duck)    | kwaal<br>(disease)       | sjeik<br>(sheikh)           | ras<br>(breed)      | zomer<br>(summer)   |                        |                    |
| 1        | -12 | target-present | vlaai<br>(flan)   | taart<br>(cake)   | wapen<br>(weapon)        | taart<br>(cake)             | sloot<br>(ditch)    | nies<br>(sneeze)    |                        |                    |
| 1        | -14 | target-present | vlam<br>(flame)   | kaars<br>(candle) | slot<br>(lock)           | kaars<br>(candle)           | lama<br>(lama)      |                     |                        |                    |
| 1        | -16 | target-absent  | kuil<br>(pit)     | gat<br>(hole)     | masker<br>(mask)         | citroen<br>(lemon)          | traan<br>(tear)     | vent<br>(guy)       | hitte<br>(heat)        |                    |
| 1        | -18 | target-present | knal<br>(bang)    | bom<br>(bomb)     | tiener<br>(teenager)     | bom<br>(bomb)               | zand<br>(sand)      |                     |                        |                    |
| 1        | -20 | target-present | vin<br>(fin)      | haai<br>(shark)   | riet<br>(cane)           | puzzel<br>(puzzle)          | haai<br>(shark)     | weiland<br>(meadow) |                        |                    |
| 2        | -2  | target-present | velg<br>(rim)     | Band<br>(tire)    | minuut<br>(minute)       | heup<br>(hip)               | eiwit<br>(protein)  | gras<br>(grass)     | band<br>(tire)         | sultan<br>(sultan) |
| 2        | -4  | target-present | graf<br>(grave)   | kruis<br>(cross)  | loon<br>(salary)         | dadel<br>(date)             | kruis<br>(cross)    | eiland<br>(island)  | werk<br>(work)         | voeding<br>(food)  |
| 2        | -6  | target-present | duim<br>(thumb)   | hand<br>(hand)    | gedicht<br>(poem)        | premier<br>(prime minister) | wortel<br>(carrot)  | hand<br>(hand)      | keer<br>(occasion)     |                    |
| 2        | -8  | target-absent  | nest              | zwaan             | vel                      | gebak                       | sieraad             | fontein             |                        |                    |

|   |     |                |                           |                             |                           |                              |                                 |                                         |                        |                         |
|---|-----|----------------|---------------------------|-----------------------------|---------------------------|------------------------------|---------------------------------|-----------------------------------------|------------------------|-------------------------|
| 2 | -10 | target-present | (nest)<br>geur<br>(smell) | (swan)<br>bloem<br>(flower) | (skin)<br>koor<br>(choir) | (pastry)<br>oproep<br>(call) | (ornament)<br>bloem<br>(flower) | (fountain)<br>afspraak<br>(appointment) |                        |                         |
| 2 | -12 | target-present | tong<br>(tongue)          | smaak<br>(taste)            | god<br>(god)              | smaak<br>(taste)             | kluis<br>(locker)               |                                         |                        |                         |
| 2 | -14 | target-present | pet<br>(cap)              | hoed<br>(hat)               | cijfer<br>(grade)         | striem<br>(stripe)           | hoed<br>(hat)                   | bleek<br>(bleach)                       |                        |                         |
| 2 | -16 | target-present | tap<br>(tap)              | bier<br>(beer)              | fort<br>(fort)            | onweer<br>(thunderstorm)     | bier<br>(beer)                  | vaarwel<br>(farewell)                   |                        |                         |
| 2 | -18 | target-absent  | biet<br>(beet)            | peen<br>(carrot)            | hek<br>(fence)            | wijs<br>(tune)               | ziel<br>(soul)                  | tractor<br>(tractor)                    | ketel<br>(kettle)      | stop<br>(stop)          |
| 2 | -20 | target-present | krijt<br>(chalk)          | bord<br>(plate)             | najaar<br>(autumn)        | bord<br>(plate)              | land<br>(land)                  |                                         |                        |                         |
| 3 | -2  | target-absent  | glas<br>(glass)           | loep<br>(lens)              | baan<br>(job)             | middel<br>(waist)            | struik<br>(bush)                |                                         |                        |                         |
| 3 | -4  | target-present | zus<br>(sister)           | broer<br>(brother)          | leerling<br>(student)     | raket<br>(rocket)            | pad<br>(toad)                   | broer<br>(brother)                      | afloop<br>(ending)     | harnas<br>(armor)       |
| 3 | -6  | target-absent  | zeil<br>(sail)            | doek<br>(cloth)             | eerbied<br>(respect)      | por<br>(poke)                | stank<br>(smell)                | buslijn<br>(bus line)                   |                        |                         |
| 3 | -8  | target-present | kaas<br>(cheese)          | muis<br>(mouse)             | plan<br>(plan)            | muis<br>(mouse)              | berg<br>(mountain)              | emmer<br>(bucket)                       | schouder<br>(shoulder) |                         |
| 3 | -10 | target-present | kat<br>(cat)              | hond<br>(dog)               | aanbod<br>(offer)         | bamboe<br>(bamboo)           | hond<br>(dog)                   | tooi<br>(attire)                        | roe<br>(birch rod)     |                         |
| 3 | -12 | target-absent  | wild<br>(game)            | beest<br>(beast)            | luik<br>(hatch)           | slof<br>(slipper)            | voeg<br>(joint)                 | kraag<br>(collar)                       | room<br>(cream)        |                         |
| 3 | -14 | target-absent  | gal<br>(bile)             | blaas<br>(bladder)          | ontzag<br>(awe)           | chef<br>(chef)               | kogel<br>(bullet)               | leer<br>(leather)                       | prijs<br>(price)       |                         |
| 3 | -16 | target-present | korst<br>(crust)          | brood<br>(bread)            | duik<br>(dive)            | accent<br>(accent)           | brood<br>(bread)                | vleugel<br>(wing)                       |                        |                         |
| 3 | -18 | target-present | kind<br>(child)           | pop<br>(doll)               | rijtuig<br>(carrier)      | pop<br>(doll)                | zwerm<br>(swarm)                | goot<br>(gutter)                        |                        |                         |
| 3 | -20 | target-absent  | schets<br>(sketch)        | klad<br>(draft)             | voetbal<br>(football)     | laars<br>(boot)              | rook<br>(smoke)                 | breuk<br>(fracture)                     | haven<br>(port)        | omgang<br>(interaction) |

Note: SNR = Signal-to-noise ratio.

## 26. Rhyme judgment

| <b>Condition</b>     | <b>Non-word 1</b> | <b>Non-word 2</b> |
|----------------------|-------------------|-------------------|
| rhyme (practice)     | kruul             | bruul             |
| rhyme (practice)     | ries              | zies              |
| foil (practice)      | zor               | lon               |
| unrelated (practice) | daaf              | puis              |
| rhyme                | bienk             | tienk             |
| rhyme                | doer              | zoer              |
| rhyme                | dral              | vral              |
| rhyme                | graak             | plaak             |
| rhyme                | guust             | muust             |
| rhyme                | haap              | baap              |
| rhyme                | hur               | nur               |
| rhyme                | jik               | zik               |
| rhyme                | kel               | mel               |
| rhyme                | klet              | gret              |
| rhyme                | lous              | gous              |
| rhyme                | meus              | deus              |
| rhyme                | momp              | tomp              |
| rhyme                | muik              | huik              |
| rhyme                | narst             | larst             |
| rhyme                | nelg              | helg              |
| rhyme                | noost             | woost             |
| rhyme                | peist             | jeist             |
| rhyme                | sluin             | pruin             |
| rhyme                | stas              | pras              |
| rhyme                | staum             | graum             |
| rhyme                | trop              | glop              |
| rhyme                | veef              | keef              |
| rhyme                | wes               | nes               |
| foil                 | bruip             | fluik             |
| foil                 | floes             | broel             |
| foil                 | gaam              | jaal              |
| foil                 | kag               | taf               |
| foil                 | krup              | slun              |
| foil                 | pum               | wul               |
| foil                 | spak              | traf              |
| foil                 | zeel              | reem              |
| unrelated            | beus              | fuug              |
| unrelated            | fap               | lim               |
| unrelated            | kweig             | preet             |
| unrelated            | meif              | zoot              |
| unrelated            | mirf              | julp              |
| unrelated            | stig              | pruk              |

|           |       |       |
|-----------|-------|-------|
| unrelated | treis | breuf |
| unrelated | wulg  | zank  |

## 27. Auditory lexical decision

| <b>Word</b>               | <b>ZipF</b> | <b>Prevalence</b> | <b>Non-word</b>                  |
|---------------------------|-------------|-------------------|----------------------------------|
| bek (beak, practice)      | 4.71        | 1.00              | bun (practice)<br>vor (practice) |
| aardbei (strawberry)      | 3.19        | 1.00              | aardloe                          |
| ambtenaar (civil servant) | 3.58        | 1.00              | anktekier                        |
| arend (eagle)             | 3.31        | 1.00              | olend                            |
| auto (car)                | 5.66        | 1.00              | auli                             |
| azijn (vinegar)           | 3.23        | 1.00              | ameen                            |
| bijbel (bible)            | 4.36        | 1.00              | boevel                           |
| bliksem (lightning)       | 4.03        | 0.99              | droksem                          |
| bloem (flower)            | 4.13        | 1.00              | zwoem                            |
| brein (brain)             | 4.22        | 1.00              | brien                            |
| bril (glasses)            | 4.39        | 1.00              | vril                             |
| chocolade (chocolate)     | 4.14        | 1.00              | quosirade                        |
| clown (clown)             | 4.07        | 1.00              | clonx                            |
| doorn (thorn)             | 3.30        | 1.00              | daarn                            |
| fles (bottle)             | 4.66        | 1.00              | smes                             |
| gebouw (building)         | 4.83        | 1.00              | gebamp                           |
| geraamte (skeleton)       | 2.85        | 1.00              | gedijgte                         |
| geschenk (gift)           | 4.27        | 1.00              | geschork                         |
| gesp (buckle)             | 2.98        | 0.99              | gelg                             |
| gitaar (guitar)           | 4.06        | 1.00              | bitier                           |
| gong (gong)               | 2.68        | 0.97              | gork                             |
| gras (grass)              | 4.27        | 1.00              | gral                             |
| hagel (hail)              | 3.13        | 1.00              | hepel                            |
| hark (rake)               | 3.18        | 0.99              | halg                             |
| haver (oat)               | 2.95        | 1.00              | faver                            |
| huig (uvula)              | 2.04        | 0.99              | kuig                             |
| jager (hunter)            | 4.05        | 1.00              | reber                            |
| kastanje (chestnut)       | 2.48        | 0.99              | kollanje                         |
| kasteel (castle)          | 4.44        | 1.00              | mastiel                          |
| kegel (pin)               | 2.63        | 0.99              | mavel                            |
| kever (beetle)            | 3.34        | 1.00              | mazer                            |
| klarinet (clarinet)       | 3.01        | 0.99              | gralinek                         |
| klomp (clog)              | 2.95        | 1.00              | gromp                            |
| korf (basket)             | 2.63        | 1.00              | kolm                             |
| krater (crater)           | 3.33        | 1.00              | grader                           |
| kruis (cross)             | 4.32        | 1.00              | kries                            |
| lamp (lamp)               | 4.14        | 0.99              | lard                             |
| magneet (magnet)          | 3.20        | 1.00              | madveet                          |
| marmot (marmot)           | 2.63        | 0.99              | marbit                           |



|                        |      |      |           |
|------------------------|------|------|-----------|
| meeuw (gull)           | 2.81 | 1.00 | peeuw     |
| microfoon (microphone) | 4.01 | 1.00 | miklohien |
| pantoffel (slipper)    | 2.36 | 1.00 | pantabbel |
| papier (paper)         | 4.49 | 1.00 | panoer    |
| parfum (perfume)       | 4.04 | 0.99 | palmus    |
| pedaal (pedal)         | 2.95 | 1.00 | periel    |
| pistool (pistol)       | 5.01 | 1.00 | postiel   |
| pizza (pizza)          | 4.39 | 1.00 | pebza     |
| professor (professor)  | 4.83 | 0.97 | rapek     |
| raket (rocket)         | 4.17 | 1.00 | ropaan    |
| rozijn (raisin)        | 2.48 | 0.99 | schebes   |
| schemer (dusk)         | 2.57 | 0.99 | schelg    |
| scherm (screen)        | 4.14 | 1.00 | schars    |
| schors (bark)          | 3.06 | 1.00 | sardaat   |
| soldaat (soldier)      | 4.72 | 1.00 | terekapie |
| televisie (television) | 4.35 | 1.00 | treik     |
| trein (train)          | 4.86 | 0.99 | letel     |
| veter (shoe lace)      | 3.12 | 0.99 | dijg      |
| vijg (fig)             | 2.36 | 0.99 | smaai     |
| vlaai (flan)           | 2.26 | 1.00 | vlijs     |
| vlees (meat)           | 4.79 | 1.00 | vliemkuig |
| voetbal (football)     | 4.11 | 0.99 | vaatlal   |

---

*Note:* ZipF = Zipf frequency.

## 28. Semantic categorization

*Category: Professions*

| <b>Words</b>                 | <b>ZipF</b> | <b>Prevalence</b> | <b>Foils</b>                | <b>ZipF</b> | <b>Prevalence</b> |
|------------------------------|-------------|-------------------|-----------------------------|-------------|-------------------|
| leraar (teacher, practice)   | 4.47        | 0.99              | kofferbak (trunk, practice) | 4.05        | 1.00              |
| tandarts (dentist, practice) | 4.16        | 1.00              | woestijn (desert, practice) | 4.44        | 1.00              |
| architect (architect)        | 3.76        | 0.99              | balkon (balcony)            | 3.82        | 1.00              |
| astronaut (astronaut)        | 3.65        | 1.00              | batterij (battery)          | 3.83        | 1.00              |
| bakker (baker)               | 3.60        | 1.00              | bladzijde (page)            | 3.63        | 1.00              |
| chirurg (surgeon)            | 3.95        | 1.00              | bushalte (busstop)          | 3.36        | 1.00              |
| docent (teacher)             | 3.53        | 1.00              | container (container)       | 3.59        | 0.99              |
| fotograaf (photographer)     | 4.00        | 1.00              | microfoon (microphone)      | 4.01        | 1.00              |
| juwelier (jeweler)           | 3.31        | 1.00              | orgaan (organ)              | 3.39        | 1.00              |
| kapper (hair dresser)        | 4.07        | 1.00              | pakket (package)            | 3.69        | 1.00              |
| kelner (waiter)              | 3.38        | 0.99              | regenwoud (rain forest)     | 3.24        | 1.00              |
| leraar (teacher, practice)   | 4.47        | 0.99              | ticket (ticket)             | 4.07        | 1.00              |
| machinist (operator)         | 3.25        | 1.00              | vanille (vanilla)           | 3.39        | 1.00              |
| makelaar (estate agent)      | 3.71        | 1.00              | zaklamp (flashlight)        | 3.71        | 1.00              |
| matroos (sailor)             | 3.60        | 1.00              |                             |             |                   |
| monteur (mechanic)           | 3.70        | 1.00              |                             |             |                   |
| notaris (notary)             | 3.34        | 1.00              |                             |             |                   |
| postbode (mailman)           | 3.80        | 1.00              |                             |             |                   |
| redacteur (editor)           | 3.69        | 1.00              |                             |             |                   |
| schipper (skipper)           | 3.51        | 0.99              |                             |             |                   |
| slager (butcher)             | 3.82        | 1.00              |                             |             |                   |
| tandarts (dentist, practice) | 4.16        | 1.00              |                             |             |                   |

*Note:* ZipF = Zipf frequency.

Category: Vehicles

| <b>Words</b>                      | <b>ZipF</b> | <b>Prevalence</b> | <b>Foils</b>                    | <b>ZipF</b> | <b>Prevalence</b> |
|-----------------------------------|-------------|-------------------|---------------------------------|-------------|-------------------|
| helikopter (helicopter, practice) | 4.34        | 0.98              | ocean (ocean, practice)         | 4.29        | 0.99              |
| vrachtwagen (truck, practice)     | 4.24        | 1.00              | schilderij (painting, practice) | 4.33        | 1.00              |
| brommer (moped)                   | 3.03        | 1.00              | badjas (bathrobe)               | 3.35        | 1.00              |
| camper (camper)                   | 3.57        | 0.99              | blokhut (log cabin)             | 2.88        | 1.00              |
| jeep (jeep)                       | 3.89        | 0.98              | borstel (brush)                 | 3.32        | 1.00              |
| kano (canoe)                      | 3.35        | 0.99              | contactlens (contact lens)      | 2.66        | 1.00              |
| koets (carriage)                  | 3.87        | 1.00              | hamster (hamster)               | 3.28        | 1.00              |
| limousine (limousine)             | 3.69        | 0.98              | kachel (heater)                 | 3.46        | 1.00              |
| metro (subway)                    | 4.12        | 1.00              | kurk (cork)                     | 3.21        | 1.00              |
| motorfiets (motorbicycle)         | 3.28        | 1.00              | lippenstift (lipstick)          | 3.81        | 1.00              |
| politieauto (police car)          | 3.31        | 0.99              | pijl (arrow)                    | 3.85        | 1.00              |
| roeiboort (rowing boat)           | 2.98        | 1.00              | pruik (wig)                     | 3.81        | 1.00              |
| schoolbus (school bus)            | 3.22        | 1.00              | roman (novel)                   | 4.04        | 0.99              |
| scooter (scooter)                 | 3.69        | 0.99              | stoplicht (traffic light)       | 3.21        | 1.00              |
| sloep (sloop)                     | 3.3         | 1.00              |                                 |             |                   |
| sneltrein (express train)         | 2.74        | 1.00              |                                 |             |                   |
| speedboot (speedboat)             | 2.95        | 1.00              |                                 |             |                   |
| tandem (tandem)                   | 2.2         | 0.99              |                                 |             |                   |
| tractor (tractor)                 | 3.38        | 1.00              |                                 |             |                   |
| tram (tram)                       | 3.26        | 1.00              |                                 |             |                   |
| veerpont (ferry)                  | 2.15        | 0.99              |                                 |             |                   |
| vrachtschip (cargo ship)          | 3.4         | 1.00              |                                 |             |                   |

Note: ZipF = Zipf frequency.

## Linguistic processing skills: Sentence production

### 29. Phrase and sentence generation

#### Phrase generation

| <b>Block 1</b><br>(single words) | <b>ZipF</b><br>(single words) | <b>Prevalence</b><br>(single words) | <b>Block 2</b><br>(two words)      | <b>Block 3</b><br>(adj/number+object) | <b>Block 4</b><br>(adj+number+object)       |
|----------------------------------|-------------------------------|-------------------------------------|------------------------------------|---------------------------------------|---------------------------------------------|
| bus (bus)<br>(practice)          | 4.81                          | 1.00                                | bus en klok<br>(bus and clock)     | twee katten<br>(two cats)             | twee blauwe katten<br>(two blue cats)       |
| kat (cat)<br>(practice)          | 4.72                          | 1.00                                | kat en touw<br>(cat and rope)      | blauw touw<br>(blue rope)             | drie gele touwen<br>(three yellow ropes)    |
| klok (clock)<br>(practice)       | 4.38                          | 1.00                                |                                    |                                       |                                             |
| touw (rope)<br>(practice)        | 4.42                          | 1.00                                |                                    |                                       |                                             |
| blad (leaf)                      | 4.05                          | 1.00                                | blad en riem<br>(leaf and belt)    | blauw boek<br>(blue book)             | drie blauwe borden<br>(three blue plates)   |
| boek (book)                      | 5.18                          | 1.00                                | boek en hond<br>(book and dog)     | blauw slot<br>(blue rope)             | drie blauwe paarden<br>(three blue horses)  |
| bord (plate)                     | 4.44                          | 1.00                                | bord en slang<br>(plate and snake) | blauwe neus<br>(blue nose)            | drie gele bladeren<br>(three yellow leaves) |
| dak (roof)                       | 4.74                          | 1.00                                | dak en bord<br>(roof and dog)      | drie paarden<br>(three horses)        | drie gele daken<br>(three yellow roofs)     |
| hond (dog)                       | 5.23                          | 1.00                                | hond en muis<br>(dog and mouse)    | drie pennen<br>(three pens)           | drie gele muizen<br>(three yellow mice)     |
| muis (mouse)                     | 4.05                          | 1.00                                | muis en paard<br>(mouse and horse) | drie slangen<br>(three snakes)        | drie gele neuzen<br>(three yellow noses)    |
| neus (nose)                      | 4.85                          | 1.00                                | neus en dak<br>(nose and roof)     | geel bord<br>(yellow plate)           | twee blauwe slangen<br>(two blue snakes)    |
| paard (horse)                    | 4.92                          | 1.00                                | paard en boek<br>(horse and book)  | geel dak<br>(yellow roof)             | twee blauwe boeken<br>(two blue books)      |
| pen (pen)                        | 4.34                          | 1.00                                | pen en slot<br>(pen and lock)      | gele muis<br>(yellow mouse)           | twee blauwe honden<br>(two blue dogs)       |
| riem (belt)                      | 4.15                          | 1.00                                | riem en pen<br>(belt and pen)      | twee bladeren<br>(two leaves)         | twee blauwe pennen<br>(two blue pens)       |
| slang (snake)                    | 4.33                          | 1.00                                | slot en blad<br>(lock and leaf)    | twee honden<br>(two dogs)             | twee gele riemen<br>(two yellow belts)      |
| slot (lock)                      | 4.72                          | 0.99                                | slang en neus<br>(snake and nose)  | twee riemen<br>(two belts)            | twee gele sloten<br>(two yellow locks)      |

Note: ZipF = Zipf frequency.

*Sentence generation*

| <b>Verbs used (blocks 5-7)</b> | <b>ZipF</b> | <b>Prevalence</b> |
|--------------------------------|-------------|-------------------|
| tekenen (draw) (practice)      | 4.68        | 0.9989            |
| vinden (find) (practice)       | 5.78        | 0.9978            |
| betalen (pay)                  | 5.21        | 0.9964            |
| fotograferen (photograph)      | 3.67        | 0.9991            |
| interviewen (interview)        | 3.72        | 0.9921            |
| kammen (comb)                  | 3.42        | 0.9972            |
| masseren (massage)             | 3.50        | 0.9966            |
| meten (measure)                | 3.78        | 0.9989            |
| achtervolgen (chase)           | 4.04        | 0.9968            |
| helpen (help)                  | 5.76        | 0.9988            |
| voeren (feed)                  | 4.56        | 0.9995            |
| kussen (kiss)                  | 4.66        | 0.9995            |
| troosten (comfort)             | 3.66        | 0.9979            |
| vervoeren (transport)          | 3.84        | 0.998             |
| knuffelen (hug)                | 3.77        | 0.9964            |
| slepen (drag)                  | 3.95        | 0.997             |
| stoppen (stop)                 | 5.29        | 0.998             |
| bedienen (serve)               | 3.85        | 0.9957            |
| begroeten (greet)              | 3.74        | 0.9991            |
| verzorgen (aiding)             | 4.03        | 0.9973            |

| <b>Block 5<br/>(questions)</b>                                        | <b>Block 6<br/>(active/passive)</b>                                             | <b>Block 7<br/>(conjunctive)</b>                                                                                                                                              |
|-----------------------------------------------------------------------|---------------------------------------------------------------------------------|-------------------------------------------------------------------------------------------------------------------------------------------------------------------------------|
| tekent de vrouw de man?<br>(does the woman draw the man?)             | de vrouw tekent de man<br>(the woman draws the man)                             | de zoektocht is ten einde, <b>omdat de man de vrouw vindt</b><br>(the search is to an end, <b>because the man finds the woman</b> )                                           |
| vindt de man de vrouw?<br>(does the man find the woman?)              | de vrouw wordt door de man gevonden<br>(the woman is being found by the man)    | de cursus moet al begonnen zijn, <b>want de vrouw tekent de man</b><br>(the class must have started, <b>since the woman is drawing the man</b> )                              |
| betaalt de vrouw de man?<br>(does the woman pay the man?)             | de man achtervolgt de vrouw<br>(the man chases the woman)                       | de automobilist moet wachten, <b>omdat de man de vrouw helpt</b><br>(the motorist has to wait, <b>because the man is helping the woman</b> )                                  |
| fotografeert de man de vrouw?<br>(does the woman photograph the man?) | de man helpt de vrouw<br>(the man helps the woman)                              | de EHBO-les lijkt in volle gang, <b>omdat de man de vrouw verzorgt</b><br>(the first aid class seems well underway, <b>because the man is aiding the woman</b> )              |
| interviewt de man de vrouw?<br>(does the man interview the woman?)    | de man voert de vrouw<br>(the man feeds the woman)                              | de wandelaar kijkt raar op, <b>omdat de man de vrouw achtervolgt</b><br>(the walker looks surprised, <b>because the man is chasing the woman</b> )                            |
| kamt de vrouw de man?<br>(does the woman comb the man?)               | de vrouw kust de man<br>(the woman kisses the man)                              | er moet sprake zijn van een gevaarlijke situatie, <b>omdat de vrouw de man sleept</b><br>(there must be a dangerous situation, <b>because the woman is dragging the man</b> ) |
| masseert de man de vrouw?<br>(does the man massage the woman?)        | de vrouw troost de man<br>(the woman comforts the man)                          | het publiek juicht, <b>omdat de vrouw de man kust</b><br>(the audience is cheering, <b>because the woman is kissing the man</b> )                                             |
| meet de vrouw de man?<br>(does the woman measure the man?)            | de vrouw vervoert de man<br>(the woman transports the man)                      | iedereen weet dat de meeting begint, <b>omdat de man de vrouw begroet</b><br>(everybody knows the meeting starts, <b>because the man is greeting the woman</b> )              |
|                                                                       | de man wordt door de vrouw geknuffeld<br>(the man is being hugged by the woman) | de wandelvierdaagse was vast zwaar, <b>want de vrouw vervoert de man</b><br>(the four day walk must have been tough, <b>since the woman transports the man</b> )              |
|                                                                       | de man wordt door de vrouw gesleept<br>(the man is being dragged by the woman)  | er moet iets naars gebeurd zijn, <b>want de vrouw troost de man</b><br>(something awful must have happened, <b>since the woman is comforting the man</b> )                    |
|                                                                       | de man wordt door de vrouw gestopt<br>(the man is being stopped by the woman)   | hardlopen is waarschijnlijk niet toegestaan hier, <b>want de vrouw stopt de man</b><br>(it is probably not allowed to run here, <b>since the woman transports the man</b> )   |
|                                                                       | de vrouw wordt door de man bediend<br>(the woman is being served by the man)    | het is tijd voor een drankje, <b>want de man bedient de vrouw</b><br>(it is time for a drink, <b>since the man serves the woman</b> )                                         |
|                                                                       | de vrouw wordt door de man begroet<br>(the woman is being greeted by the man)   | hun relatie moet goed zijn, <b>want de vrouw knuffelt de man</b><br>(their relationship must be good, <b>since the woman hugs the man</b> )                                   |
|                                                                       | de vrouw wordt door de man verzorgd<br>(the woman is being aided by the man)    | zij zullen wel geliefden zijn, <b>want de man voert de vrouw</b><br>(they must be lovers, <b>since the man is feeding the woman</b> )                                         |

### 30. Spontaneous speech

Question 1: “Wat heeft u het afgelopen weekend gedaan?”

*“What did you do during the last weekend?”*

Question 2: “Vertel de verhaallijn van een film of serie die u recentelijk hebt gezien of een boek dat u hebt gelezen.”

*“Tell the storyline of a movie or series that you have recently seen or a book that you have read.”*

Question 3: “Vertel hoe uw perfecte vakantie eruit zou zien.”

*“What would be your dream holiday?”*

## Linguistic processing skills: Sentence comprehension

### 31. Gender cue activation during sentence comprehension

| <b>Item</b>                | <b>Gender</b> | <b>ZipF</b> | <b>Prevalence</b> |
|----------------------------|---------------|-------------|-------------------|
| fles (bottle, practice)    | de            | 4.66        | 1                 |
| haai (shark, practice)     | de            | 3.97        | 1                 |
| slot (lock, practice)      | het           | 4.72        | 0.99              |
| wiel (wheel, practice)     | het           | 3.85        | 1                 |
| appel (apple)              | de            | 4.01        | 1                 |
| auto (car)                 | de            | 5.66        | 1                 |
| bal (ball)                 | de            | 4.91        | 1                 |
| bever (beaver)             | de            | 3.47        | 1                 |
| bezem (broom)              | de            | 3.58        | 1                 |
| boom (tree)                | de            | 4.72        | 1                 |
| doos (box)                 | de            | 4.58        | 1                 |
| fiets (bicycle)            | de            | 4.34        | 0.99              |
| fontein (fountain)         | de            | 3.6         | 1                 |
| geit (goat)                | de            | 3.91        | 0.99              |
| gieter (watering can)      | de            | 2.51        | 1                 |
| glijbaan (slide)           | de            | 2.7         | 1                 |
| handschoen (glove)         | de            | 3.82        | 1                 |
| hoed (hat)                 | de            | 4.56        | 1                 |
| kaas (cheese)              | de            | 4.36        | 1                 |
| koelkast (refrigerator)    | de            | 4.17        | 1                 |
| krokodil (crocodile)       | de            | 3.69        | 1                 |
| muis (mouse)               | de            | 4.05        | 1                 |
| neus (nose)                | de            | 4.85        | 1                 |
| piano (piano)              | de            | 4.15        | 1                 |
| pijl (arrow)               | de            | 3.85        | 0.99              |
| pinguïn (penguin)          | de            | 3.39        | -                 |
| piramide (pyramid)         | de            | 3.44        | 0.98              |
| radio (radio)              | de            | 4.77        | 1                 |
| ring (ring)                | de            | 4.72        | 1                 |
| rits (zipper)              | de            | 3.64        | 1                 |
| roos (rose)                | de            | 4.07        | 1                 |
| rugzak (backpack)          | de            | 3.88        | 1                 |
| slak (snail)               | de            | 3.38        | 1                 |
| sneeuwpop (snowman)        | de            | 3.03        | 1                 |
| spijker (nail)             | de            | 3.55        | 1                 |
| spin (spider)              | de            | 3.89        | 1                 |
| stoel (chair)              | de            | 4.71        | 1                 |
| tak (branch)               | de            | 3.93        | 1                 |
| tandenborstel (toothbrush) | de            | 3.62        | 1                 |
| trompet (trumpet)          | de            | 3.43        | 1                 |
| vleugel (wing)             | de            | 3.95        | 0.99              |



|                          |     |      |      |
|--------------------------|-----|------|------|
| vork (fork)              | de  | 3.72 | 1    |
| weegschaal (scale)       | de  | 3.26 | 1    |
| zebra (zebra)            | De  | 3.49 | 1    |
| anker (anchor)           | het | 3.7  | 1    |
| aquarium (fish tank)     | het | 3.46 | 1    |
| balkon (balcony)         | het | 3.82 | 1    |
| been (leg)               | het | 4.73 | 0.99 |
| blik (can)               | het | 4.56 | 1    |
| boek (book)              | het | 5.18 | 1    |
| bord (plate)             | het | 4.44 | 1    |
| bot (bone)               | het | 4.16 | 1    |
| brood (bread)            | het | 4.53 | 1    |
| cadeau (gift)            | het | 4.47 | 1    |
| gewei (antlers)          | het | 3.08 | 0.99 |
| glas (glass)             | het | 4.76 | 1    |
| graf (grave)             | het | 4.54 | 1    |
| hart (heart)             | het | 5.29 | 1    |
| hek (fence)              | het | 4.36 | 1    |
| hert (deer)              | het | 3.79 | 1    |
| hoefijzer (horseshoe)    | het | 2.85 | 1    |
| horloge (watch)          | het | 4.45 | 1    |
| kanon (cannon)           | het | 3.79 | 1    |
| kasteel (castle)         | het | 4.44 | 1    |
| konijn (rabbit)          | het | 4.28 | 1    |
| kruis (cross)            | het | 4.32 | 1    |
| masker (mask)            | het | 4.28 | 1    |
| mes (knife)              | het | 4.67 | 1    |
| nest (nest)              | het | 4.05 | 1    |
| nijlpaard (hippo)        | het | 3.22 | 1    |
| oog (eye)                | het | 4.84 | 1    |
| oor (ear)                | het | 4.4  | 1    |
| paard (horse)            | het | 4.92 | 1    |
| palet (palette)          | het | 2.36 | 0.98 |
| potlood (pencil)         | het | 3.74 | 1    |
| raam (window)            | het | 4.85 | 1    |
| schaap (sheep)           | het | 3.82 | 1    |
| spaarvarken (piggy bank) | het | 2.66 | 1    |
| strijkijzer (iron)       | het | 2.85 | 1    |
| stuur (steering wheel)   | het | 5.06 | 1    |
| touw (rope)              | het | 4.42 | 1    |
| varken (pig)             | het | 4.39 | 1    |
| vliegtuig (airplane)     | het | 4.95 | 1    |
| zadel (saddle)           | het | 3.84 | 1    |

*Note:* ZipF = Zipf frequency.

### 32. Verb semantics activation during sentence comprehension

| Target object                 | Verb                      | Distractor                   | ZipF<br>(target) | Prevalence<br>(target) | CP   |
|-------------------------------|---------------------------|------------------------------|------------------|------------------------|------|
| <b>Predictable items</b>      |                           |                              |                  |                        |      |
| bril (glasses, practice)      | schilderen (paint)        | slang (snake)                | 4.39             | 1                      | 0    |
| standbeeld (statue, practice) | onthullen (reveal)        | zaklamp (flashlight)         | 3.67             | 1                      | 0.17 |
| baard (beard)                 | scheren (shave)           | trui (sweater)               | 4.07             | 1                      | 0.51 |
| band (tire)                   | verwisselen (switch)      | krant (paper)                | 4.9              | 1                      | 0.46 |
| bank (couch)                  | bekleden (upholster)      | schip (ship)                 | 4.96             | 1                      | 0.14 |
| beker (cup)                   | winnen (win)              | kikker (frog)                | 3.94             | 1                      | 0.06 |
| biertje (beer)                | drinken (drink)           | koffer (suitcase)            | 4.54             | 1                      | 0.6  |
| bloem (flower)                | planten (plant)           | sput (syringe)               | 4.13             | 1                      | 0.06 |
| boterham (sandwich)           | smeren (prepare sandwich) | lucifer (lucifer)            | 3.78             | 1                      | 0.77 |
| broek (pants)                 | passen (fit)              | voet (foot)                  | 4.83             | 1                      | 0.49 |
| contract (contract)           | ondertekenen (sign)       | vogel (bird)                 | 4.55             | 1                      | 0.69 |
| deur (door)                   | openen (open)             | pak (suit)                   | 5.39             | 1                      | 0.31 |
| dief (thief)                  | arresteren (arrest)       | aap (monkey)                 | 4.48             | 1                      | 0.34 |
| ijsje (ice cream)             | likken (lick)             | emmer (bucket)               | 3.87             | 1                      | 0.77 |
| lamp (lamp)                   | vervangen (replace)       | schop (shovel)               | 4.14             | 0.99                   | 0.31 |
| muur (wall)                   | behangen (paper)          | trein (train)                | 4.83             | 1                      | 0.8  |
| sinaasappel (orange)          | persen (press)            | typemachine (typing machine) | 3.25             | 0.98                   | 0.71 |
| taart (cake)                  | bakken (bake)             | berg (mountain)              | 4.5              | 1                      | 0.51 |
| tafel (table)                 | dekken (cover)            | sleutel (key)                | 4.92             | 1                      | 0.66 |
| tas (bag)                     | dragen (carry)            | bus (bus)                    | 4.77             | 1                      | 0.09 |
| vis (fish)                    | vangen (catch)            | tent (tent)                  | 4.7              | 1                      | 0.23 |
| wond (wound)                  | hechten (suture)          | vlag (flag)                  | 4.15             | 1                      | 0.8  |
| <b>Unpredictable items</b>    |                           |                              |                  |                        |      |
| ballon (balloon)              | verbergen (hide)          | laptop (laptop)              | 3.72             | 1                      | 0    |
| bijl (axe)                    | lenen (borrow)            | pan (pan)                    | 3.97             | 1                      | 0    |
| fluit (flute)                 | zoeken (search)           | schaar (scissors)            | 3.87             | 1                      | 0    |
| frisbee (frisbee)             | betalen (pay)             | trommel (drum)               | 3.26             | 0.99                   | 0    |
| gitaar (guitar)               | bewaken (guard)           | robot (robot)                | 4.06             | 1                      | 0    |
| hanger (hanger)               | pakken (get)              | muffin (muffin)              | 3.26             | 0.98                   | 0    |
| kind (child)                  | zien (see)                | bel (bell)                   | 5.52             | 1                      | 0    |
| magneet (magnet)              | tekenen (draw)            | stoplicht (traffic light)    | 3.2              | 1                      | 0    |
| muts (cap)                    | verstoppen (hide)         | zaag (saw)                   | 3.65             | 1                      | 0    |
| overhemd (shirt)              | verkopen (sell)           | lippenstift (lipstick)       | 3.83             | 0.99                   | 0    |
| pen (pen)                     | stelen (steal)            | klok (clock)                 | 4.34             | 1                      | 0    |
| pijp (pipe)                   | verliezen (lose)          | ei (egg)                     | 4.14             | 0.99                   | 0    |
| sigaar (cigar)                | filmen (film)             | viool (violin)               | 3.99             | 1                      | 0    |
| sjaal (scarf)                 | ontvangen (receive)       | kaars (candle)               | 3.73             | 0.99                   | 0    |
| spiegel (mirror)              | kopen (buy)               | pizza (pizza)                | 4.44             | 1                      | 0    |
| stethoscoop (stethoscope)     | bekijken (watch)          | paddestoel (mushroom)        | 2.7              | 0.97                   | 0    |
| uil (owl)                     | beschrijven (describe)    | boor (drill)                 | 3.5              | 1                      | 0    |
| veer (feather)                | overhandigen (hand over)  | mand (basket)                | 3.54             | 1                      | 0    |
| zeilboot (sailboat)           | kiezen (choose)           | colbert (jacket)             | 3.14             | 1                      | 0    |
| zwaard (sword)                | fotograferen (photograph) | jurk (dress)                 | 4.57             | 1                      | 0    |

Note: ZipF = Zipf frequency; CP = Cloze probability.

### 33. Monitoring in noise in sentences

(green = target present; red = target absent)

#### Predictable Items

| Condition                 | Cue                | ZipF | Prevalence | CP   | Sentence                                                                                                                                                                  |
|---------------------------|--------------------|------|------------|------|---------------------------------------------------------------------------------------------------------------------------------------------------------------------------|
| cue-present<br>(practice) | kroon<br>(crown)   | 4.16 | 1.00       | 0.87 | Op zijn hoofd droeg de koning een <b>kroon</b> en in zijn hand hield hij een scepter<br>(On his head the king wore a crown and in his hand he held a mace)                |
| cue-present<br>(practice) | veer<br>(feather)  | 3.54 | 1.00       | 0.00 | Je vergeet het maar waarschijnlijk heb ik een <b>veer</b> van die zeldzame vogel<br>(You might have forgotten, but I probably have a feather from that rare bird)         |
| cue-absent<br>(practice)  | plein<br>(plaza)   | 3.74 | 1.00       | 0.87 | De valentijnskaart had de vorm van een <b>hart</b> en was rood<br>(The valentine's day card was shaped like a heart and red)                                              |
| cue-present               | berg<br>(mountain) | 4.54 | 1.00       | 1.00 | De klimmers bereikten het hoogste punt van de <b>berg</b> met een euforisch gevoel<br>(The climbers reached the highest point of the mountain with a feeling of euphoria) |
| cue-present               | deur<br>(door)     | 5.39 | 1.00       | 1.00 | Je moet altijd kloppen op mijn <b>deur</b> voordat je binnenkomt<br>(You always have to knock on my door before entering)                                                 |
| cue-present               | kaars<br>(candle)  | 3.77 | 1.00       | 1.00 | De stroom viel uit maar gelukkig had ik thuis nog een <b>kaars</b> om aan te steken<br>(The power went out but luckily I had a candle at home to lit)                     |
| cue-present               | boek<br>(book)     | 5.18 | 1.00       | 1.00 | De schrijfster ondertekende haar nieuwe <b>boek</b> voor haar trouwe fans<br>(The writer signed her new book for her loyal fans)                                          |
| cue-present               | bord<br>(plate)    | 4.44 | 1.00       | 1.00 | Ik schep meestal teveel op mijn <b>bord</b> als mijn moeder kookt<br>(I usually put too much food on my plate when my mother cooks)                                       |
| cue-present               | bril<br>(glasses)  | 4.39 | 1.00       | 1.00 | Mijn opa kan niets lezen zonder zijn <b>bril</b> met multifocale glazen<br>(My grandfather cannot read anything without his glasses with customized progressive lenses)   |
| cue-present               | helm<br>(helmet)   | 4.04 | 1.00       | 1.00 | De jongen reed op een scooter zonder <b>helm</b> en kreeg een bekeuring<br>(The boy was riding his scooter without a helmet and got fined)                                |
| cue-present               | hond<br>(dog)      | 5.23 | 1.00       | 1.00 | De puppy werd een grote <b>hond</b> met veel haar<br>(The puppy became a big dog with a lot of hair)                                                                      |
| cue-present               | mand<br>(basket)   | 3.63 | 1.00       | 1.00 | Voor de picknick pakken we alles in een <b>mand</b> van riet<br>(For the picnic, we gather everything in a basket made of cane)                                           |

|             |                    |      |      |      |                                                                                                                                                                     |
|-------------|--------------------|------|------|------|---------------------------------------------------------------------------------------------------------------------------------------------------------------------|
| cue-present | nest<br>(nest)     | 4.05 | 1.00 | 1.00 | De jonge vogeltjes leefden nog steeds in hun <b>nest</b> gemaakt van takjes en bladeren<br>(The little birds still lived in their nest made of twigs and leaves)    |
| cue-present | pijl<br>(arrow)    | 3.85 | 0.99 | 1.00 | De boogschutter schoot met een puntige <b>pijl</b> op het doel<br>(The archer shot a pointy arrow towards the goal)                                                 |
| cue-present | clown<br>(clown)   | 4.07 | 1.00 | 1.00 | In dit circus hebben ze een heel grappige <b>clown</b> die iedereen aan het lachen maakt<br>(In this circus they have a very funny clown who makes everybody laugh) |
| cue-present | kaart<br>(map)     | 4.90 | 1.00 | 1.00 | De wereldatlas bevat van ieder land een <b>kaart</b> met legenda<br>(The world atlas contains for each country a map with a legend)                                 |
| cue-present | schoen<br>(shoe)   | 4.13 | 0.99 | 1.00 | Voor Sinterklaas zetten de kinderen hun <b>schoen</b> bij de open haard<br>(For Sinterklaas all the children put out their shoe at the fireplace)                   |
| cue-present | zweep<br>(whip)    | 3.69 | 1.00 | 1.00 | Het paard wordt aangespoord met een <b>zweep</b> door de strenge ruiter<br>(The horse is urged with a whip by the stern rider)                                      |
| cue-present | fluit<br>(whistle) | 3.87 | 1.00 | 1.00 | De scheidsrechter blies hard op zijn <b>fluit</b> toen er een overtreding werd gemaakt<br>(The referee loudly blew his whistle when a violation was made)           |
| cue-present | maan<br>(moon)     | 4.62 | 1.00 | 1.00 | De astronauten landden op de <b>maan</b> op 20 juli 1969<br>(The astronauts landed on the moon on 20 July 1969)                                                     |
| cue-present | bij<br>(bee)       |      | 1.00 | 1.00 | Honing wordt gemaakt door een <b>bij</b> die nectar uit bloemen verzamelt<br>(Honey is made by a bee that collects nectar from flowers)                             |
| cue-present | graf<br>(grave)    | 4.54 | 1.00 | 0.93 | Op het kerkhof bezocht ze haar vaders <b>graf</b> en legde er bloemen<br>(At the graveyard she visited her father's grave and put flowers on it)                    |
| cue-present | bank<br>(couch)    | 4.96 | 1.00 | 1.00 | Op zondagen hang ik vaak lekker op de <b>bank</b> met een zak chips<br>(On Sundays I am often relaxing on the couch with a bag of crisps)                           |
| cue-absent  | pan<br>(pan)       | 3.97 | 1.00 | 1.00 | De gelovigen gaan met kerstavond altijd naar de <b>kerk</b> in het dorp<br>(On Christmas eve, people who believe in God always go to church in the village)         |
| cue-absent  | vork<br>(fork)     | 3.72 | 1.00 | 1.00 | Om haar vinger droeg ze een mooie <b>ring</b> van goud<br>(On her ring she wore a beautiful ring made of gold)                                                      |

|            |                    |      |      |      |                                                                                                                                                    |
|------------|--------------------|------|------|------|----------------------------------------------------------------------------------------------------------------------------------------------------|
| cue-absent | ruit<br>(diamonds) | 3.57 | 1.00 | 1.00 | Ik doe deze bloemen in een <b>vaas</b> met een laag schoon water<br>(I put these flowers in a vase filled with clean water)                        |
| cue-absent | vos<br>(fox)       | 3.88 | 1.00 | 1.00 | Jonge meisjes spelen graag met een <b>pop</b> of een barbie<br>(Young girls like to play with a doll or a Barbie doll)                             |
| cue-absent | knop<br>(button)   | 4.22 | 1.00 | 1.00 | Mijn nichtje is jarig dus ik bak een <b>taart</b> met veel chocolade<br>(It is my cousin's birthday so I am baking a cake with a lot of chocolate) |
| cue-absent | lijm<br>(glue)     | 3.60 | 1.00 | 1.00 | Pinocchio was een jongen met een lange <b>neus</b> omdat hij steeds loog<br>(Pinocchio was a boy with a long nose because he always lied)          |
| cue-absent | plank<br>(shelf)   | 4.05 | 1.00 | 1.00 | Zijn broek zakt af want hij heeft geen <b>riem</b> omgedaan<br>(His pants are dropping because he did not put on a belt)                           |
| cue-absent | sneeuw<br>(snow)   | 4.39 | 1.00 | 1.00 | Bob was moe dus ging hij naar <b>bed</b> zodra zijn vriendin thuiskwam<br>(Bob was tired so he went to bed as soon as his girlfriend got home)     |
| cue-absent | haak<br>(hook)     | 4.10 | 1.00 | 1.00 | De Utrechtse Dom luidt heel hard haar <b>klok</b> die gerenoveerd was<br>(The Dom in Utrecht very loudly rings her bell which was renovated)       |
| cue-absent | noot<br>(nut)      | 3.58 | 1.00 | 1.00 | Deze twee planken moet je vastzetten met een <b>schroef</b> in de muur<br>(These two shelves should be secured with screws onto the wall)          |

---

*Note:* ZipF = Zipf frequency; CP = Cloze probability.

## Control Items

| Condition   | Cue                  | ZipF | Prevalence | CP | Sentence                                                                                                                                                              |
|-------------|----------------------|------|------------|----|-----------------------------------------------------------------------------------------------------------------------------------------------------------------------|
| cue-present | bal<br>(ball)        | 4.91 | 1.00       | 0  | We proberen het eerst met een <b>bal</b> die niet zo zwaar is<br>(We will first try with a ball that is not so heavy)                                                 |
| cue-present | kan<br>(can)         |      | 1.00       | 0  | De winkel verkocht een rode <b>kan</b> voor tien euro<br>(The store sold a red can for ten euros)                                                                     |
| cue-present | koe<br>(cow)         | 4.27 | 1.00       | 0  | Het kind tekende een <b>koe</b> op het schoolbord<br>(The child drew a cow on the blackboard)                                                                         |
| cue-present | mug<br>(mosquito)    | 3.35 | 0.99       | 0  | In de ruimte was een irritante <b>mug</b> die rond mijn hoofd zoemde<br>(In the room there was an annoying mosquito buzzing around my head)                           |
| cue-present | net<br>(net)         |      | 1.00       | 0  | Ze wilden iets anders dus ze kochten een <b>net</b> om vissen te vangen<br>(They wanted to do something else so they bought a net to catch fish)                      |
| cue-present | put<br>(well)        | 4.07 | 0.99       | 0  | Vroeger moesten mensen lang lopen naar een <b>put</b> om aan water te komen<br>(Back in the days people walked a long time to a well to get water from)               |
| cue-present | tas<br>(bag)         | 4.77 | 1.00       | 0  | Het tijdschrift adverteerde met een dure <b>tas</b> van een Frans merk<br>(The magazine advertised with an expensive bag of a French brand)                           |
| cue-present | zon<br>(sun)         | 4.84 | 1.00       | 0  | Dit is een plaats met veel <b>zon</b> in de zomer<br>(This is a place with a lot of sun in the summer)                                                                |
| cue-present | doos<br>(box)        | 4.58 | 1.00       | 0  | Toen ik in de hoek keek, zag ik een <b>doos</b> waarin een poes lag te slapen<br>(When I looked in the corner, I saw a box with a cat that was sleeping)              |
| cue-present | jurk<br>(dress)      | 4.75 | 1.00       | 0  | Het meisje maakte een lange <b>jurk</b> van paars zijde<br>(The girl made a long dress of purple silk)                                                                |
| cue-present | lamp<br>(lamp)       | 4.14 | 0.99       | 0  | Voor het bezoek van mijn oom kocht ik een <b>lamp</b> bij de IKEA<br>(For the visit to my uncle I bought a lamp at IKEA)                                              |
| cue-present | tent<br>(tent)       | 4.61 | 1.00       | 0  | Gedurende de dag was hij nauwelijks in de <b>tent</b> te vinden<br>(During the day he was hardly ever in the tent)                                                    |
| cue-present | roos<br>(rose)       | 4.07 | 1.00       | 0  | De jongen kocht op de markt een gele <b>roos</b> voor zijn vriendin<br>(At the market the boy bought a yellow rose for his girlfriend)                                |
| cue-present | slang<br>(snake)     | 4.33 | 1.00       | 0  | Die groep mensen is druk in gesprek over een <b>slang</b> die als huisdier werd gehouden<br>(That group of people is busy discussing a snake which was held as a pet) |
| cue-present | schaar<br>(scissors) | 3.80 | 0.99       | 0  | Ik moet dit kunnen aanpassen maar heb helaas geen <b>schaar</b> bij me<br>(I need to be able to adjust this but I don't have a pair of scissors with me)              |

|             |                   |      |      |   |                                                                                                                                                                                                           |
|-------------|-------------------|------|------|---|-----------------------------------------------------------------------------------------------------------------------------------------------------------------------------------------------------------|
| cue-present | schelp<br>(shell) | 3.13 | 1.00 | 0 | We zoeken op het werk naar een <b>schelp</b> om aan onze collectie toe te voegen<br>(At work we are searching for a shell to add to our collection)                                                       |
| cue-present | bad<br>(bath)     | 4.63 | 1.00 | 0 | In de avond neem ik heel graag een <b>bad</b> voordat ik naar bed ga<br>(At night I love to take a bath before going to bed)                                                                              |
| cue-present | bot<br>(bone)     | 4.16 | 1.00 | 0 | Toen ik mijn eten at, zag ik daar een stukje <b>bot</b> in zitten<br>(When eating my dinner, I noticed it had a piece of bone in it)                                                                      |
| cue-present | pruik<br>(wig)    | 3.81 | 1.00 | 0 | De vrouw gebruikte steeds meer haar <b>pruik</b> als ze naar buiten ging<br>(The woman more often used her wig when going outside)                                                                        |
| cue-present | kurk<br>(cork)    | 3.21 | 1.00 | 0 | Ik maak dit nog dicht met een <b>kurk</b> en ga dan naar huis<br>(I will close this with a cork and then I will go home)                                                                                  |
| cue-absent  | staart<br>(tail)  | 4.25 | 1.00 | 0 | In de reclame zag je een <b>bijl</b> om hout mee te hakken<br>(In the advertisement you saw an axe for wood chopping)                                                                                     |
| cue-absent  | rijst<br>(rice)   | 3.96 | 1.00 | 0 | Ze kunnen hier niet lopen vanwege een onbekend probleem aan de <b>brug</b> dat nog niet verholpen is<br>(They cannot walk here because of an unknown problem with the bridge that has not yet been fixed) |
| cue-absent  | wijn<br>(wine)    | 4.78 | 1.00 | 0 | Ik las een verhaal over een <b>kooi</b> en een tijger<br>(I read a story about a cage and a tiger)                                                                                                        |
| cue-absent  | vlag<br>(flag)    | 4.25 | 1.00 | 0 | De man genoot van het ruiken aan de <b>pijp</b> als hij thuis was<br>(The man enjoyed smelling the pipe when he was home)                                                                                 |
| cue-absent  | zwaard<br>(sword) | 4.57 | 1.00 | 0 | Dit wordt gemaakt van <b>brood</b> dat een paar dagen oud is<br>(This is made of bread that is a few days old)                                                                                            |
| cue-absent  | boot<br>(boat)    | 4.98 | 1.00 | 0 | In het hoekje vond hij zijn <b>knoop</b> die hij verloren was<br>(In the corner he found his button that he had lost)                                                                                     |
| cue-absent  | troon<br>(throne) | 4.08 | 1.00 | 0 | Het meisje maakte een <b>sjaal</b> voor de winter<br>(The girl made a scarf for the winter)                                                                                                               |
| cue-absent  | rook<br>(smoke)   | 4.67 | 0.99 | 0 | De winkel op de hoek verkoopt een mooie <b>pet</b> van het nationale voetbalelftal<br>(The shop on the corner sells a nice cap from the national soccer team)                                             |
| cue-absent  | trap<br>(stairs)  | 4.72 | 1.00 | 0 | Het is niet goed om iets te halen uit een <b>blik</b> dat ongeopend bol staat<br>(It is not good for you to take something from a can that is unopened and bumpy)                                         |
| cue-absent  | sok<br>(sock)     | 3.49 | 1.00 | 0 | Voor de jonge vrouw pakken we de <b>kam</b> om haar haar in model te brengen<br>(For the young woman we get the comb to style her hair)                                                                   |

*Note: ZipF = Zipf frequency; CP = Cloze probability.*
